# Supplementary material
Source: PubMed Central journal article supplement (PMC8255129)

# SNP-based GWAS for Leukocyte Telomere Length- EUR from ENGAGE consortia

Summary per genomic risk locus ?

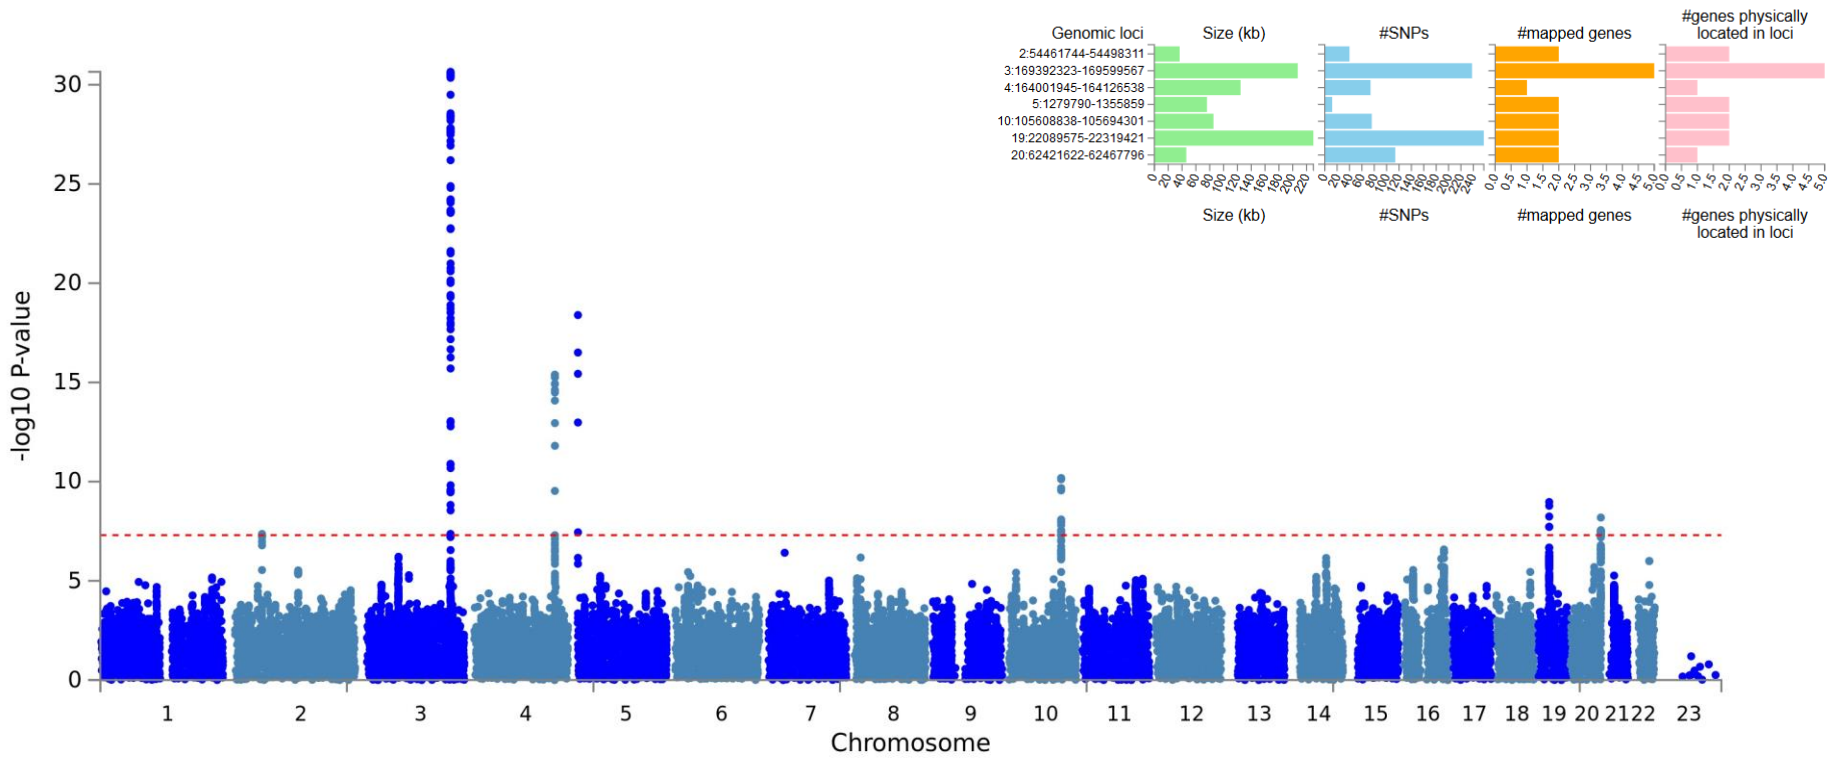

# SNP-based GWAS for Leukocyte Telomere Length- EAS from Dorajoo et. al 2019

[https://figshare.com/articles/Singapore\\_Chinese\\_LTL\\_GWAS\\_Meta-analysis/8066999](https://figshare.com/articles/Singapore_Chinese_LTL_GWAS_Meta-analysis/8066999)

Summary per genomic risk locus ?

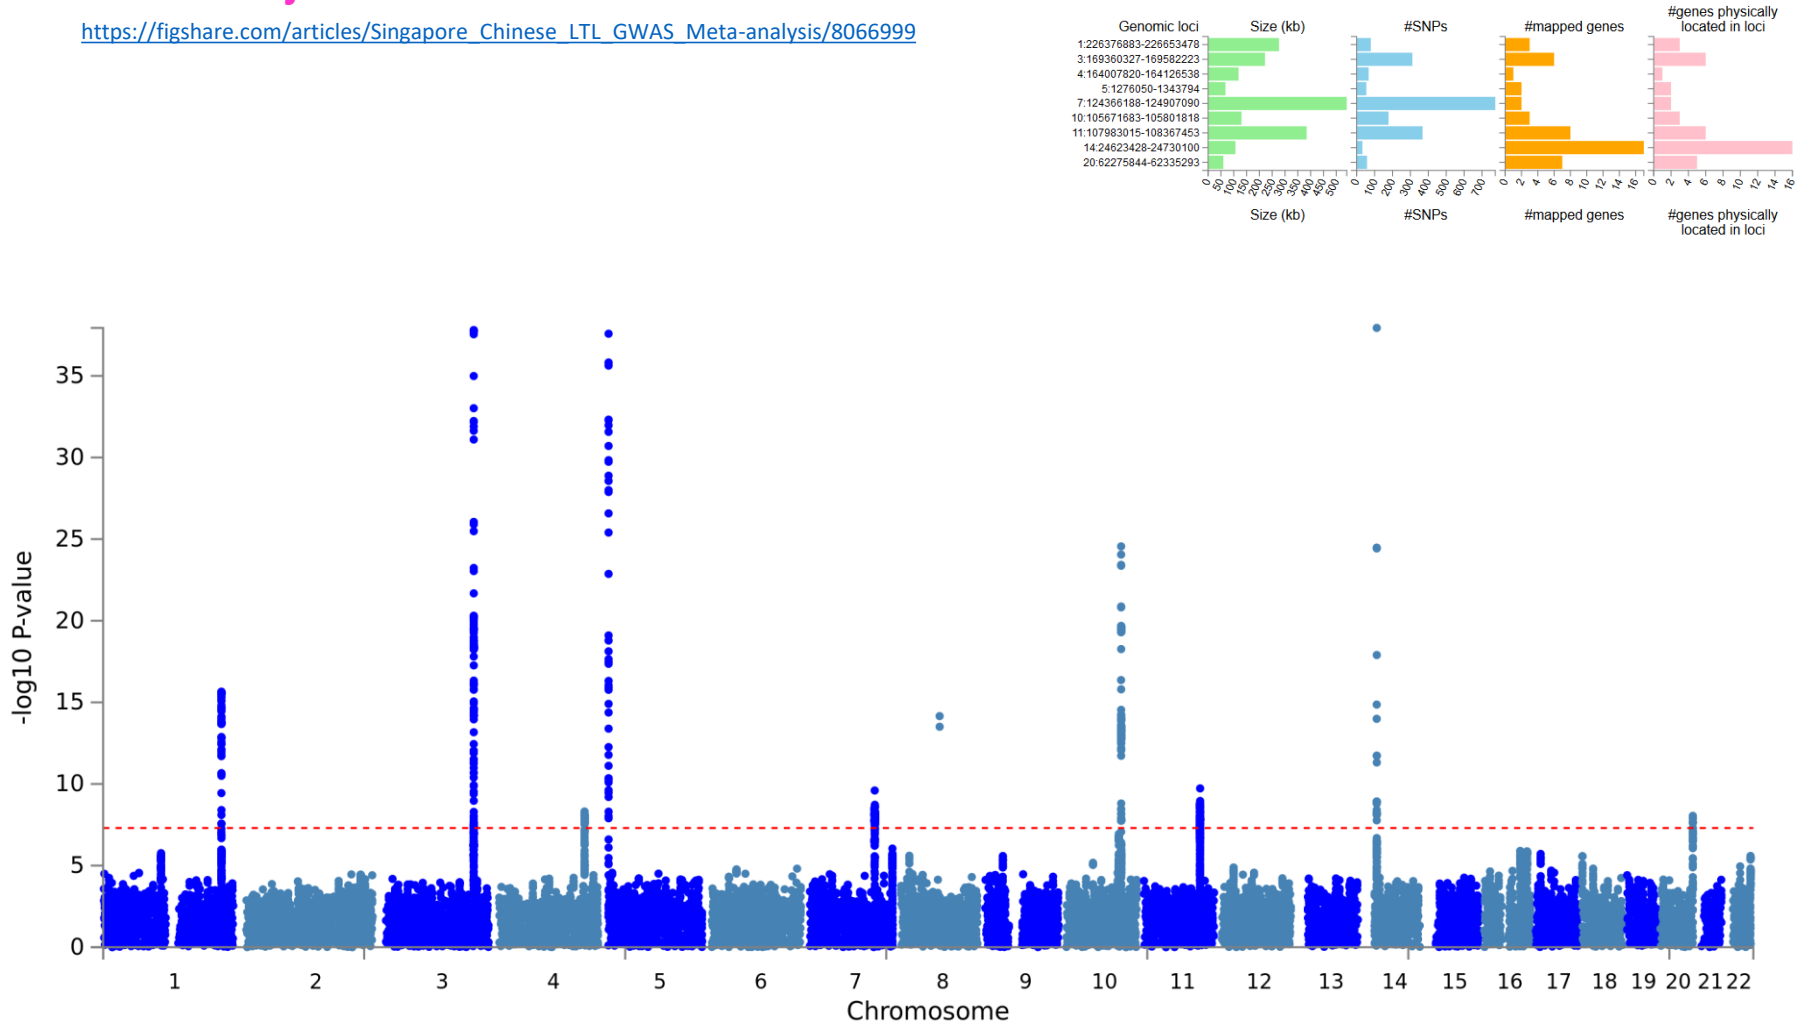

## Gene (positional mapping)-based GWAS European Ancestry

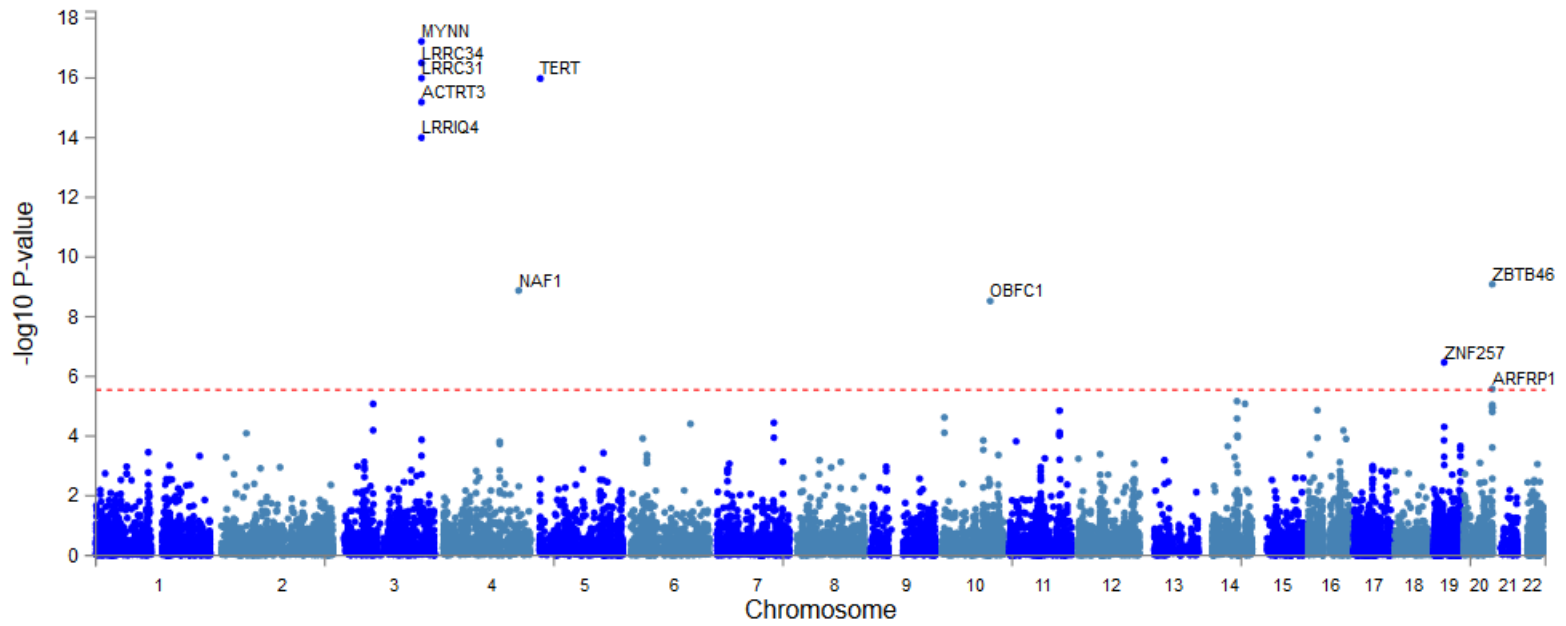

Summary per genomic risk locus ?

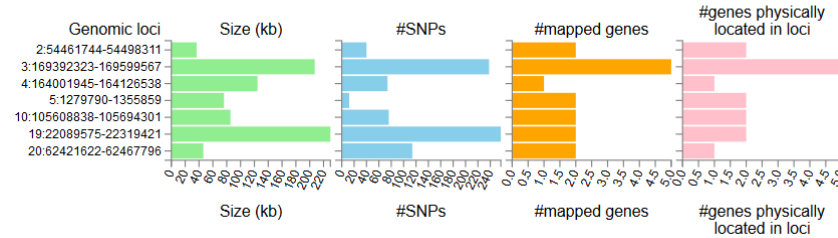

## Gene (positional mapping)-based GWAS East Asian Ancestry

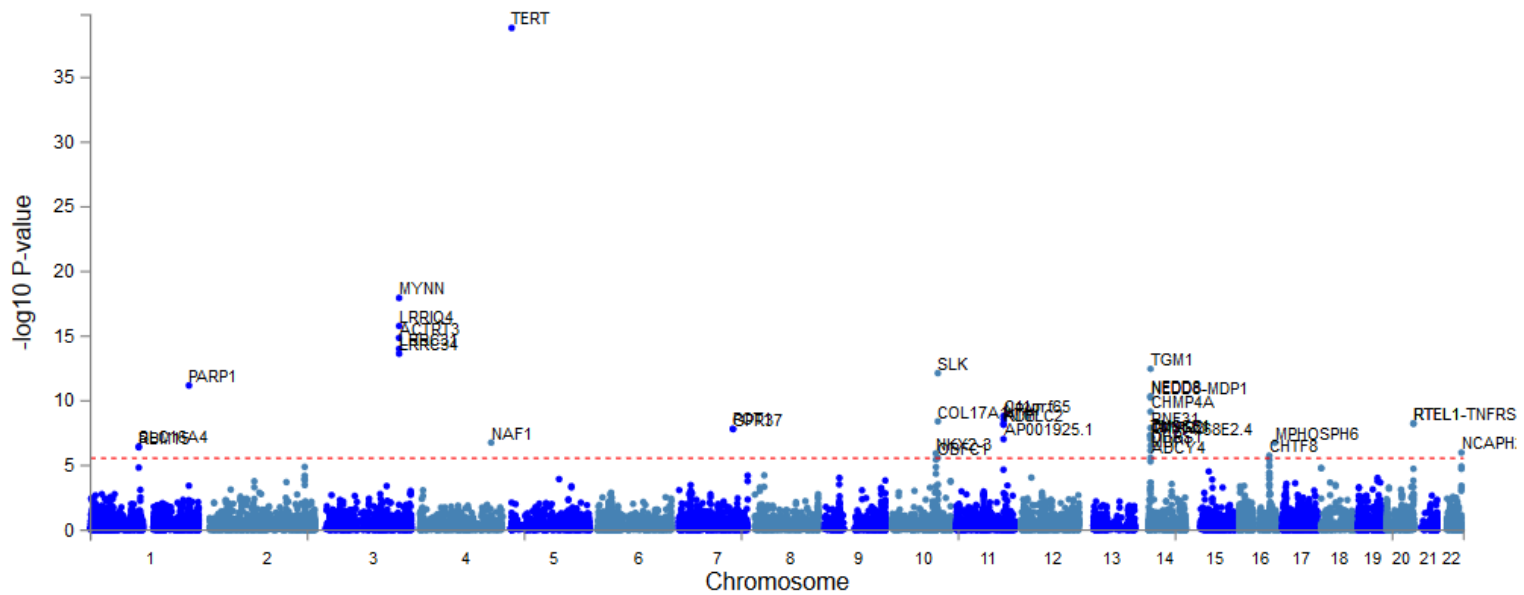

Summary per genomic risk locus ?

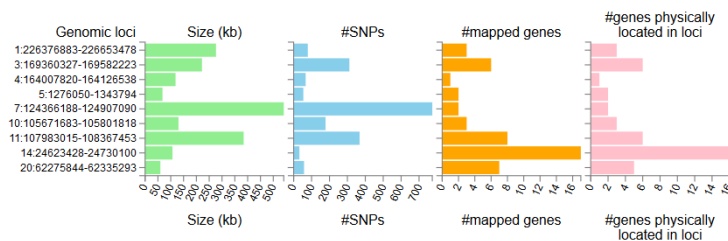

# Regional Plots for each locus

## Chromosome 1

### EAS

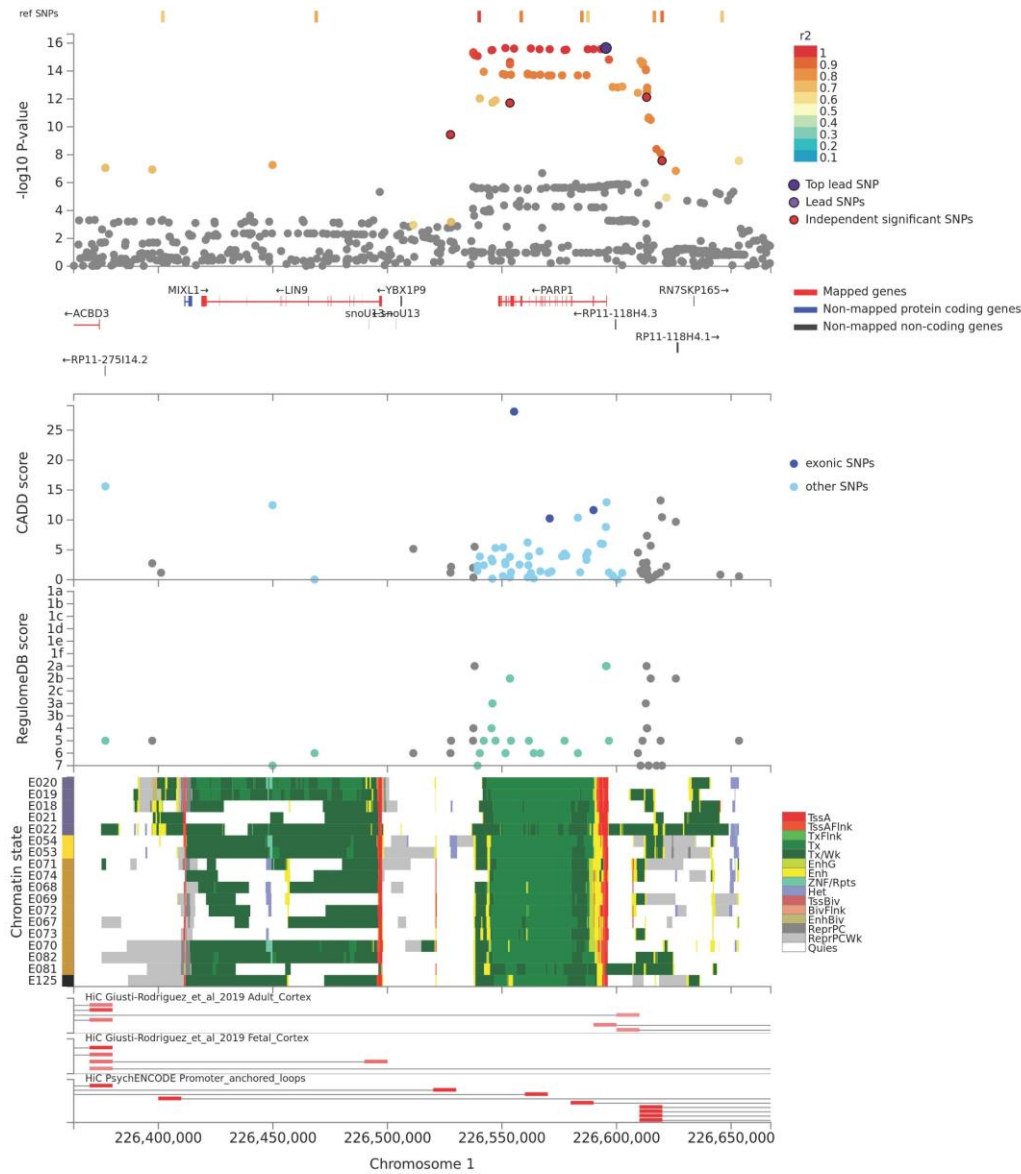

### Regulome DB

| Category | Description                                                                 |
|----------|-----------------------------------------------------------------------------|
| 1a       | Likely to affect binding and linked to expression of a gene target          |
| 1b       | eQTL + TF binding + matched TF motif + matched DNase footprint + DNase peak |
| 1c       | eQTL + TF binding + any motif + DNase footprint + DNase peak                |
| 1d       | eQTL + TF binding + matched TF motif + DNase peak                           |
| 1e       | eQTL + TF binding + any motif + DNase peak                                  |
| 1f       | eQTL + TF binding + matched TF motif                                        |
| 2a       | Likely to affect binding                                                    |
| 2b       | TF binding + matched TF motif + matched DNase footprint + DNase peak        |
| 2c       | TF binding + any motif + DNase footprint + DNase peak                       |
| 3a       | TF binding + matched TF motif + DNase peak                                  |
| 3b       | TF binding + any motif + DNase peak                                         |
| 3c       | TF binding + matched TF motif                                               |
| 4        | Less likely to affect binding                                               |
| 5        | TF binding + DNase peak                                                     |
| 6        | TF binding or DNase peak                                                    |
| 7        | Minimal binding evidence                                                    |
| NA       | TF binding + DNase peak                                                     |
| NA       | TF binding or DNase peak                                                    |
| NA       | Motif hit                                                                   |
| NA       | No binding evidence                                                         |
| NA       | No evidence                                                                 |
| NA       | the variant does not exist in RegulomeDB                                    |

### 15-core chromatin state

| Epigenome ID |         | Group      | Anatomy | Standardized epigenome name                             |
|--------------|---------|------------|---------|---------------------------------------------------------|
| EID          | Color   |            |         |                                                         |
| E020         | #9608A  | iPSC       | iPSC    | iPS-20b Cells                                           |
| E019         | #9608A  | iPSC       | iPSC    | iPS-18 Cells                                            |
| E018         | #9608A  | iPSC       | iPSC    | iPS-15b Cells                                           |
| E021         | #9608A  | iPSC       | iPSC    | iPS DF 6.9 Cells                                        |
| E022         | #9608A  | iPSC       | iPSC    | iPS DF 19.11 Cells                                      |
| E054         | #FFD924 | Neurosp    | BRAIN   | Ganglion Eminence derived primary cultured neurospheres |
| E053         | #FFD924 | Neurosp    | BRAIN   | Cortex derived primary cultured neurospheres            |
| E071         | #C5912B | Brain      | BRAIN   | Brain Hippocampus Middle                                |
| E074         | #C5912B | Brain      | BRAIN   | Brain Substantia Nigra                                  |
| E068         | #C5912B | Brain      | BRAIN   | Brain Anterior Caudate                                  |
| E069         | #C5912B | Brain      | BRAIN   | Brain Inferior Temporal Lobe                            |
| E072         | #C5912B | Brain      | BRAIN   | Brain Cingulate Gyrus                                   |
| E067         | #C5912B | Brain      | BRAIN   | Brain Angular Gyrus                                     |
| E073         | #C5912B | Brain      | BRAIN   | Brain_Dorsolateral_Prefrontal_Cortex                    |
| E070         | #C5912B | Brain      | BRAIN   | Brain Germinal Matrix                                   |
| E082         | #C5912B | Brain      | BRAIN   | Fetal Brain Female                                      |
| E081         | #C5912B | Brain      | BRAIN   | Fetal Brain Male                                        |
| E125         | #000000 | ENCODE2012 | BRAIN   | NH-A Astrocytes Primary Cells                           |

\*External link to RegulomeDB from SNP table (when one of the SNPs is clicked) will open a new tab. rsID does not always match since RegulomeDB used dbSNP build 141 (the rsID in FUMA is dbSNP build 146). Genomic position (bp on hg19) shown in the link of RegulomeDB is the position shown in the SNP table - 1, since RegulomeDB used 0 based coordinate.

\*When 15-core chromatin state is included in the plot and >30 cell types are selected, the labels of Y-axis are omitted. The order of the cell types is same as the legend table.

# Chromosome 2

EUR

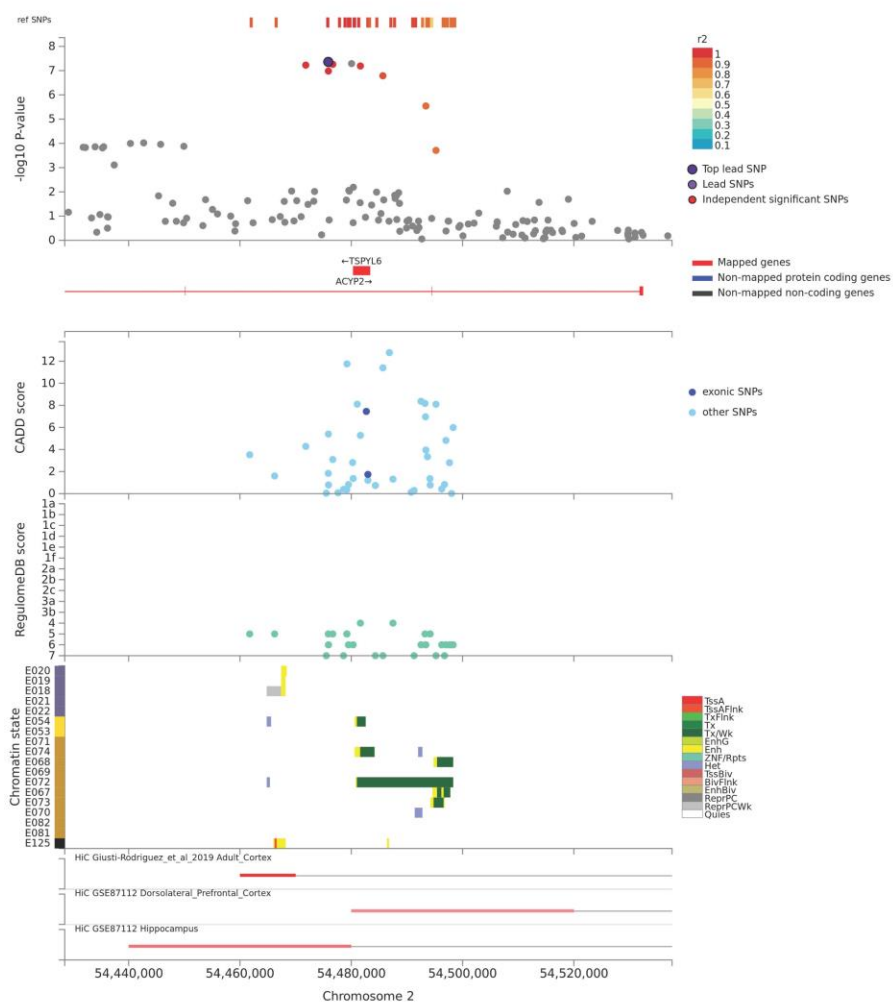

## Regulome DB

### RegulomeDB Categorical Scores

| Category | Description                                                                 |
|----------|-----------------------------------------------------------------------------|
| 1a       | Likely to affect binding and linked to expression of a gene target          |
| 1b       | eQTL + TF binding + matched TF motif + matched DNase footprint + DNase peak |
| 1c       | eQTL + TF binding + any motif + DNase footprint + DNase peak                |
| 1d       | eQTL + TF binding + matched TF motif + DNase peak                           |
| 1e       | eQTL + TF binding + any motif + DNase peak                                  |
| 1f       | eQTL + TF binding + matched TF motif                                        |
| 2a       | eQTL + TF binding/DNase peak                                                |
| 2b       | Likely to affect binding                                                    |
| 2c       | TF binding + matched TF motif + matched DNase footprint + DNase peak        |
| 3a       | TF binding + any motif + DNase footprint + DNase peak                       |
| 3b       | TF binding + matched TF motif + DNase peak                                  |
| 4        | Less likely to affect binding                                               |
| 5        | TF binding + any motif + DNase peak                                         |
| 6        | TF binding + matched TF motif                                               |
| 7        | Minimal binding evidence                                                    |
| NA       | TF binding + DNase peak                                                     |
|          | TF binding or DNase peak                                                    |
|          | Motif hit                                                                   |
|          | No binding evidence                                                         |
|          | No evidence                                                                 |
|          | the variant does not exist in RegulomeDB                                    |

## 15-core chromatin state

### Epigenome ID

| EID  | Color   | Group      | Anatomy | Standardized epigenome name                             |
|------|---------|------------|---------|---------------------------------------------------------|
| E020 | #89608A | iPSC       | iPSC    | iPS-20b Cells                                           |
| E019 | #89608A | iPSC       | iPSC    | iPS-18 Cells                                            |
| E018 | #89608A | iPSC       | iPSC    | iPS-15b Cells                                           |
| E021 | #89608A | iPSC       | iPSC    | iPS DF 6.9 Cells                                        |
| E022 | #89608A | iPSC       | iPSC    | iPS DF 19.11 Cells                                      |
| E054 | #FFD924 | Neurosph   | BRAIN   | Ganglion Eminence derived primary cultured neurospheres |
| E053 | #FFD924 | Neurosph   | BRAIN   | Cortex derived primary cultured neurospheres            |
| E071 | #C5912B | Brain      | BRAIN   | Brain Hippocampus Middle                                |
| E074 | #C5912B | Brain      | BRAIN   | Brain Substantia Nigra                                  |
| E068 | #C5912B | Brain      | BRAIN   | Brain Anterior Caudate                                  |
| E069 | #C5912B | Brain      | BRAIN   | Brain Cingulate Gyrus                                   |
| E072 | #C5912B | Brain      | BRAIN   | Brain Inferior Temporal Lobe                            |
| E067 | #C5912B | Brain      | BRAIN   | Brain Angular Gyrus                                     |
| E073 | #C5912B | Brain      | BRAIN   | Brain_Dorsolateral_Prefrontal_Cortex                    |
| E070 | #C5912B | Brain      | BRAIN   | Brain Germinal Matrix                                   |
| E082 | #C5912B | Brain      | BRAIN   | Fetal Brain Female                                      |
| E081 | #C5912B | Brain      | BRAIN   | Fetal Brain Male                                        |
| E125 | #000000 | ENCODE2012 | BRAIN   | NH-A Astrocytes Primary Cells                           |

\*External link to RegulomeDB from SNP table (when one of the SNPs is clicked) will open a new tab. rsID does not always match since RegulomeDB used dbSNP build 141 (the rsID in FUMA is dbSNP build 146). Genomic position (bp on hg19) shown in the link of RegulomeDB is the position shown in the SNP table - 1, since RegulomeDB used 0 based coordinate.

\*When 15-core chromatin state is included in the plot and >30 cell types are selected, the labels of Y-axis are omitted. The order of the cell types is same as the legend table.

# Chromosome 3

## EAS

## EUR

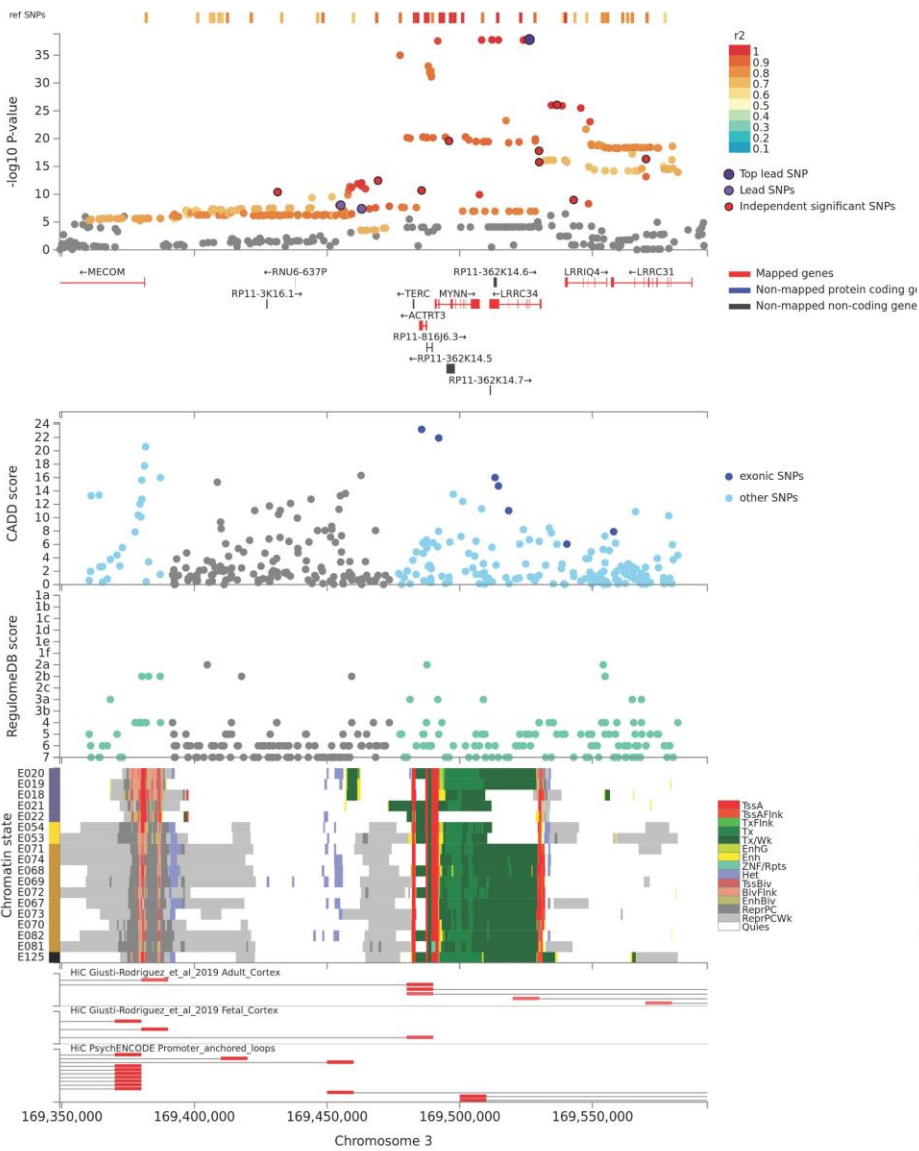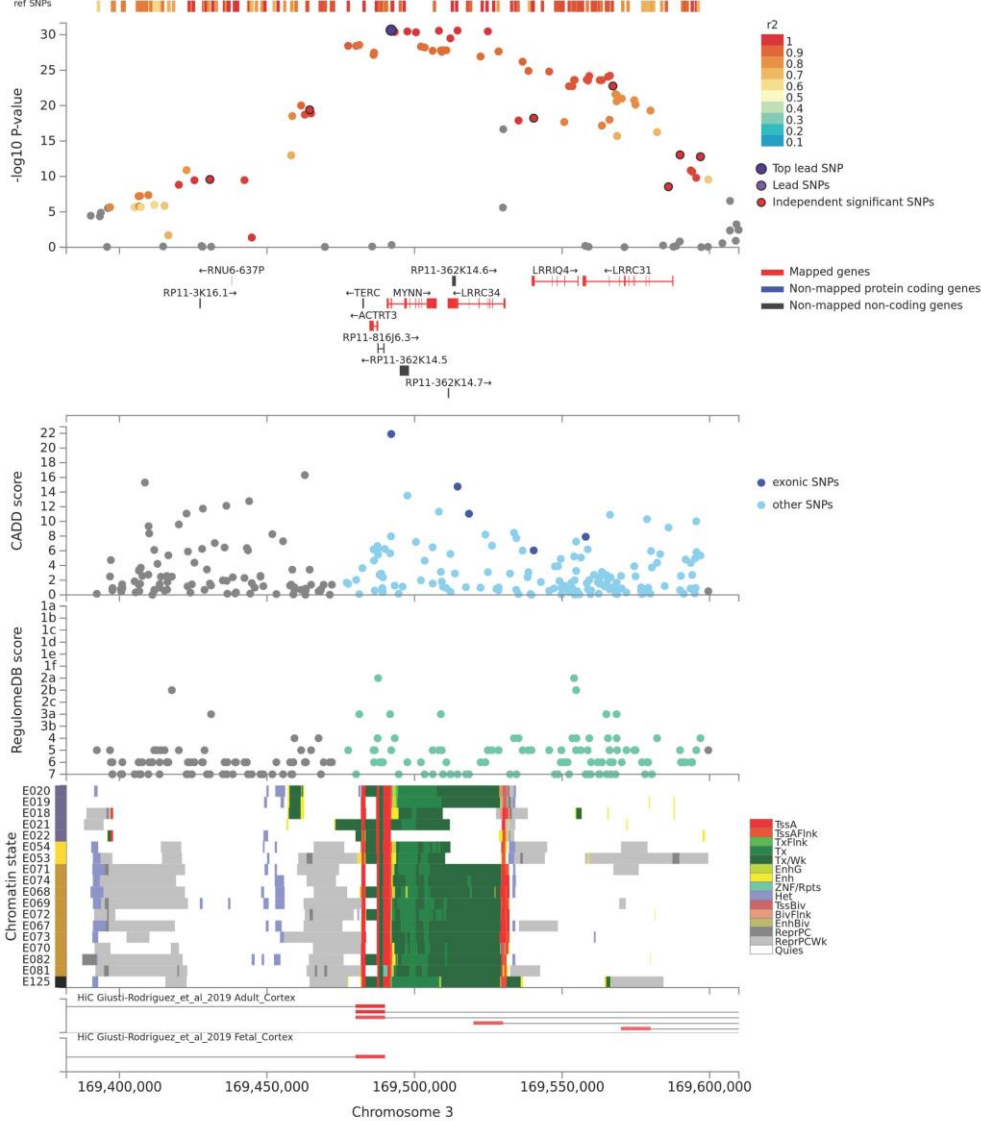

### Regulome DB

#### RegulomeDB Categorical Scores

| Category | Description                                                                 |
|----------|-----------------------------------------------------------------------------|
| 1a       | Likely to affect binding and linked to expression of a gene target          |
| 1b       | eQTL + TF binding + matched TF motif + matched DNase footprint + DNase peak |
| 1c       | eQTL + TF binding + any motif + DNase footprint + DNase peak                |
| 1d       | eQTL + TF binding + matched TF motif + DNase peak                           |
| 1e       | eQTL + TF binding + any motif + DNase peak                                  |
| 1f       | eQTL + TF binding + matched TF motif                                        |
| 2a       | Likely to affect binding                                                    |
| 2b       | TF binding + matched TF motif + matched DNase footprint + DNase peak        |
| 2c       | TF binding + any motif + DNase footprint + DNase peak                       |
| 3a       | TF binding + matched TF motif + DNase peak                                  |
| 3b       | Less likely to affect binding                                               |
| 4        | TF binding + any motif + DNase peak                                         |
| 5        | TF binding + matched TF motif                                               |
| 6        | Minimal binding evidence                                                    |
| 7        | TF binding + DNase peak                                                     |
| NA       | TF binding or DNase peak                                                    |
|          | Motif hit                                                                   |
|          | No binding evidence                                                         |
|          | No evidence                                                                 |
|          | the variant does not exist in RegulomeDB                                    |

### 15-core chromatin state

#### Epigenome ID

| EID  | Color   | Group      | Anatomy | Standardized epigenome name                             |
|------|---------|------------|---------|---------------------------------------------------------|
| E020 | #89608A | iPSC       | iPSC    | iPS-20b Cells                                           |
| E019 | #89608A | iPSC       | iPSC    | iPS-18 Cells                                            |
| E018 | #89608A | iPSC       | iPSC    | iPS-15b Cells                                           |
| E021 | #89608A | iPSC       | iPSC    | iPS DF 6.9 Cells                                        |
| E022 | #89608A | iPSC       | iPSC    | iPS DF 19.11 Cells                                      |
| E054 | #FFD924 | Neurosp    | BRAIN   | Ganglion Eminence derived primary cultured neurospheres |
| E053 | #FFD924 | Neurosp    | BRAIN   | Cortex derived primary cultured neurospheres            |
| E071 | #C5912B | Brain      | BRAIN   | Brain Hippocampus Middle                                |
| E074 | #C5912B | Brain      | BRAIN   | Brain Substantia Nigra                                  |
| E068 | #C5912B | Brain      | BRAIN   | Brain Anterior Caudate                                  |
| E069 | #C5912B | Brain      | BRAIN   | Brain Cingulate Gyrus                                   |
| E072 | #C5912B | Brain      | BRAIN   | Brain Inferior Temporal Lobe                            |
| E067 | #C5912B | Brain      | BRAIN   | Brain Angular Gyrus                                     |
| E073 | #C5912B | Brain      | BRAIN   | Brain_Dorsolateral_Prefrontal_Cortex                    |
| E070 | #C5912B | Brain      | BRAIN   | Brain Germinal Matrix                                   |
| E082 | #C5912B | Brain      | BRAIN   | Fetal Brain Female                                      |
| E081 | #C5912B | Brain      | BRAIN   | Fetal Brain Male                                        |
| E125 | #000000 | ENCODE2012 | BRAIN   | NH-A Astrocytes Primary Cells                           |

\*External link to RegulomeDB from SNP table (when one of the SNPs is clicked) will open a new tab. rsID does not always match since RegulomeDB used dbSNP build 141 (the rsID in FUMA is dbSNP build 146). Genomic position (bp on hg19) shown in the link of RegulomeDB is the position shown in the SNP table - 1, since RegulomeDB used 0 based coordinate.

\*When 15-core chromatin state is included in the plot and >30 cell types are selected, the labels of Y-axis are omitted. The order of the cell types is same as the legend table.

# Chromosome 4

## EAS

## EUR

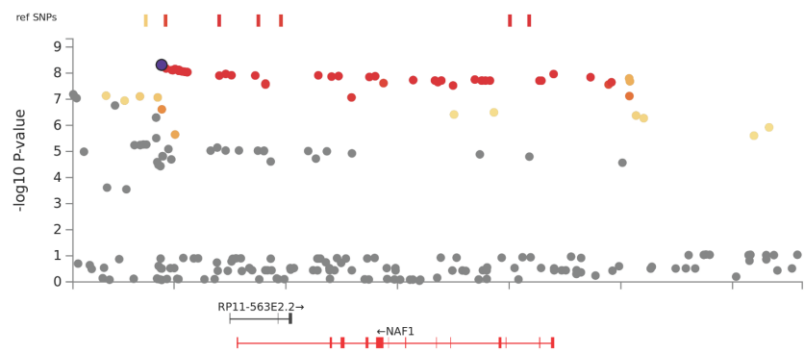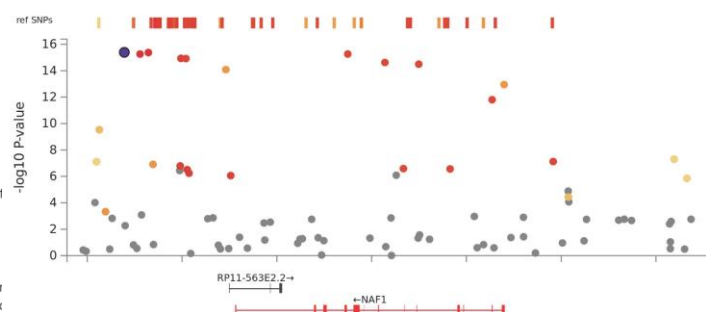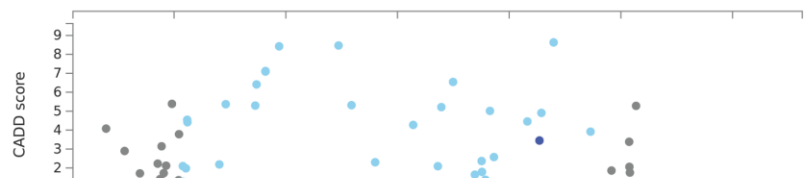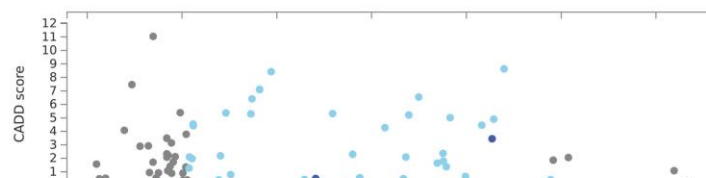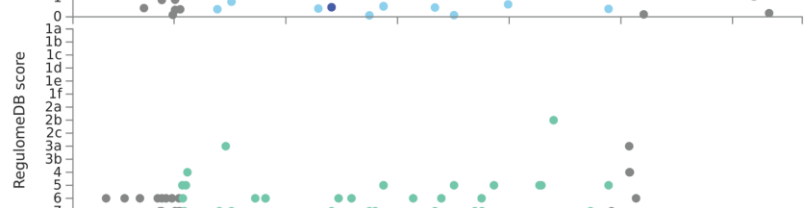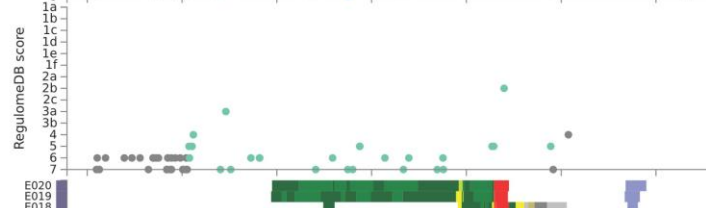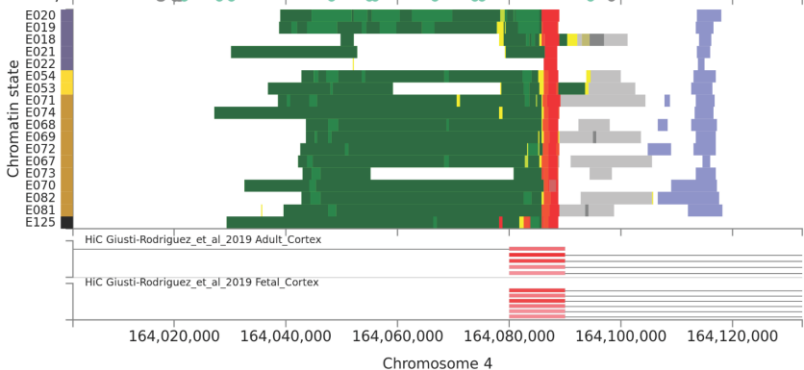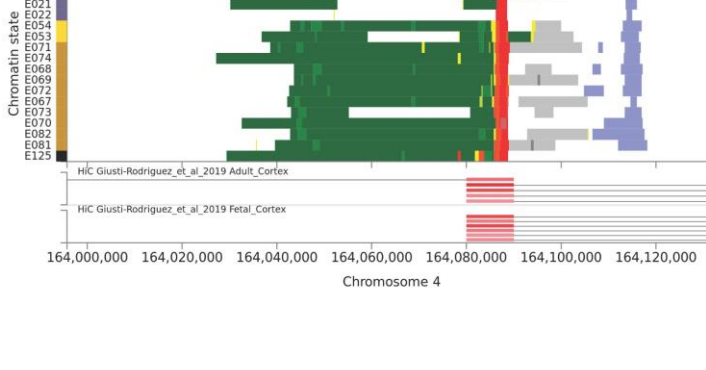

### Regulome DB

| RegulomeDB Categorical Scores |                                                                             |
|-------------------------------|-----------------------------------------------------------------------------|
| Category                      | Description                                                                 |
| 1a                            | Likely to affect binding and linked to expression of a gene target          |
| 1b                            | eQTL + TF binding + matched TF motif + matched DNase footprint + DNase peak |
| 1c                            | eQTL + TF binding + any motif + DNase footprint + DNase peak                |
| 1d                            | eQTL + TF binding + matched TF motif + DNase peak                           |
| 1e                            | eQTL + TF binding + any motif + DNase peak                                  |
| 1f                            | eQTL + TF binding + matched TF motif                                        |
| 2a                            | Likely to affect binding                                                    |
| 2b                            | TF binding + matched TF motif + matched DNase footprint + DNase peak        |
| 2c                            | TF binding + any motif + DNase footprint + DNase peak                       |
| 3a                            | Less likely to affect binding                                               |
| 3b                            | TF binding + matched TF motif + DNase peak                                  |
| 4                             | Minimal binding evidence                                                    |
| 5                             | TF binding + DNase peak                                                     |
| 6                             | TF binding or DNase peak                                                    |
| 7                             | Motif hit                                                                   |
| NA                            | No binding evidence                                                         |
|                               | No evidence                                                                 |
|                               | the variant does not exist in RegulomeDB                                    |

### 15-core chromatin state

| Epigenome ID |         |            |         |                                                         |
|--------------|---------|------------|---------|---------------------------------------------------------|
| EID          | Color   | Group      | Anatomy | Standardized epigenome name                             |
| E020         | #89608A | iPSC       | iPSC    | iPS-20b Cells                                           |
| E019         | #89608A | iPSC       | iPSC    | iPS-18 Cells                                            |
| E018         | #89608A | iPSC       | iPSC    | iPS-15b Cells                                           |
| E021         | #89608A | iPSC       | iPSC    | iPS DF 6.9 Cells                                        |
| E022         | #89608A | iPSC       | iPSC    | iPS DF 19.11 Cells                                      |
| E054         | #FFD924 | Neurosph   | BRAIN   | Ganglion Eminence derived primary cultured neurospheres |
| E053         | #FFD924 | Neurosph   | BRAIN   | Cortex derived primary cultured neurospheres            |
| E071         | #C5912B | Brain      | BRAIN   | Brain Hippocampus Middle                                |
| E074         | #C5912B | Brain      | BRAIN   | Brain Substantia Nigra                                  |
| E068         | #C5912B | Brain      | BRAIN   | Brain Anterior Caudate                                  |
| E069         | #C5912B | Brain      | BRAIN   | Brain Cingulate Gyrus                                   |
| E072         | #C5912B | Brain      | BRAIN   | Brain Inferior Temporal Lobe                            |
| E067         | #C5912B | Brain      | BRAIN   | Brain Angular Gyrus                                     |
| E073         | #C5912B | Brain      | BRAIN   | Brain_Dorsolateral_Prefrontal_Cortex                    |
| E070         | #C5912B | Brain      | BRAIN   | Brain Germinal Matrix                                   |
| E082         | #C5912B | Brain      | BRAIN   | Fetal Brain Female                                      |
| E081         | #C5912B | Brain      | BRAIN   | Fetal Brain Male                                        |
| E125         | #000000 | ENCODE2012 | BRAIN   | NH-A Astrocytes Primary Cells                           |

\*External link to RegulomeDB from SNP table (when one of the SNPs is clicked) will open a new tab. rsID does not always match since RegulomeDB used dbSNP build 141 (the rsID in FUMA is dbSNP build 146). Genomic position (bp on hg19) shown in the link of RegulomeDB is the position shown in the SNP table - 1, since RegulomeDB used 0 based coordinate.

\*When 15-core chromatin state is included in the plot and >30 cell types are selected, the labels of Y-axis are omitted. The order of the cell types is same as the legend table.

# Chromosome 5

## EAS

## EUR

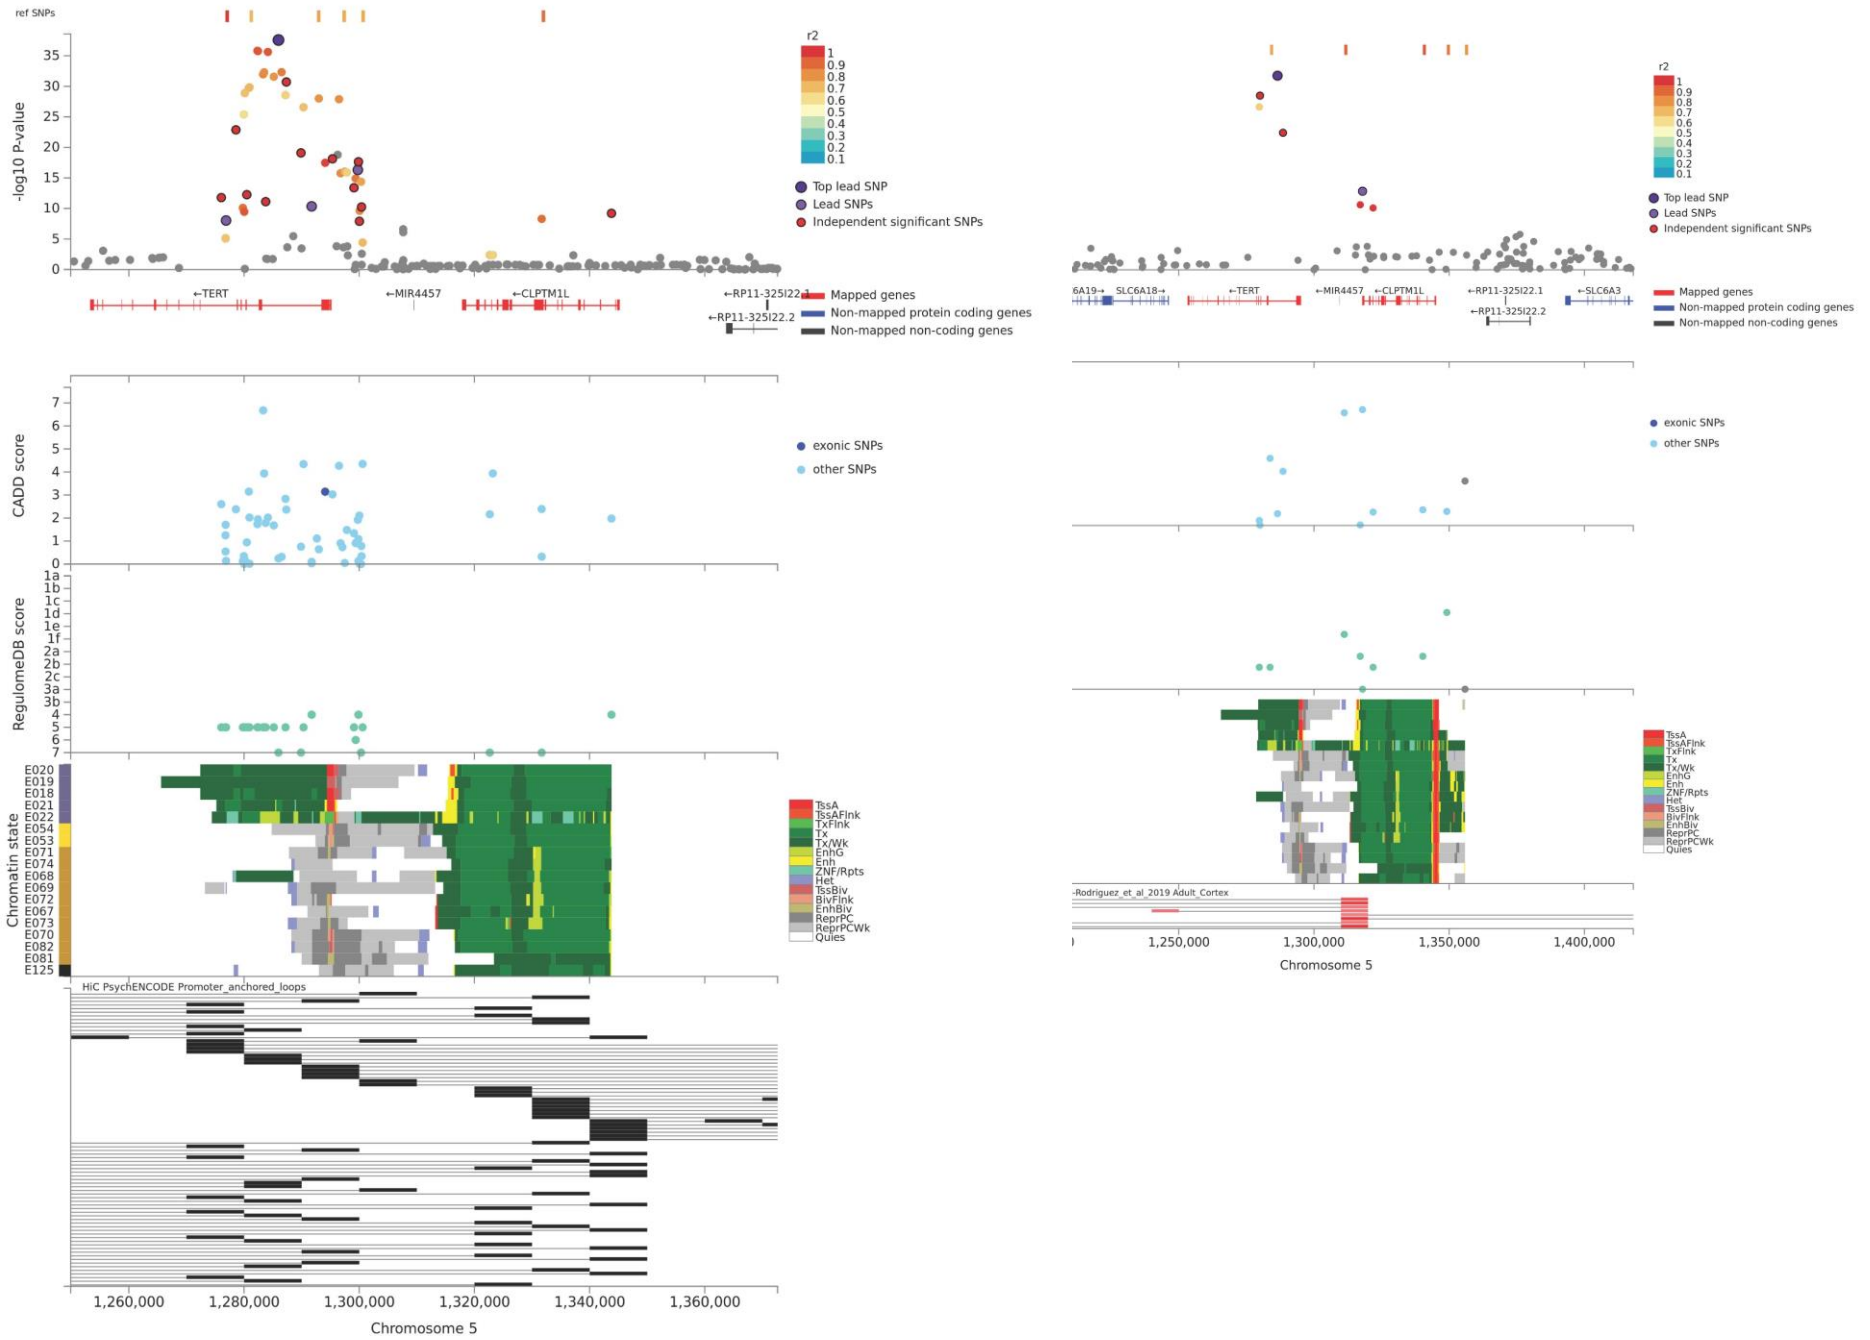

### Regulome DB

| Category | Description                                                                 |
|----------|-----------------------------------------------------------------------------|
| 1a       | Likely to affect binding and linked to expression of a gene target          |
| 1b       | eQTL + TF binding + matched TF motif + matched DNase footprint + DNase peak |
| 1c       | eQTL + TF binding + any motif + DNase footprint + DNase peak                |
| 1d       | eQTL + TF binding + matched TF motif + DNase peak                           |
| 1e       | eQTL + TF binding + any motif + DNase peak                                  |
| 1f       | eQTL + TF binding + matched TF motif                                        |
| 2a       | Likely to affect binding                                                    |
| 2b       | TF binding + matched TF motif + matched DNase footprint + DNase peak        |
| 2c       | TF binding + any motif + DNase footprint + DNase peak                       |
| 3a       | Less likely to affect binding                                               |
| 3b       | TF binding + matched TF motif                                               |
| 4        | Minimal binding evidence                                                    |
| 5        | TF binding + DNase peak                                                     |
| 6        | TF binding or DNase peak                                                    |
| 7        | Motif hit                                                                   |
| NA       | No binding evidence                                                         |
|          | No evidence                                                                 |
|          | the variant does not exist in RegulomeDB                                    |

\*External link to RegulomeDB from SNP table (when one of the SNPs is clicked) will open a new tab. rsID does not always match since RegulomeDB used dbSNP build 141 (the rsID in FUMA is dbSNP build 146). Genomic position (bp on hg19) shown in the link of RegulomeDB is the position shown in the SNP table - 1, since RegulomeDB used 0 based coordinate.

### 15-core chromatin state

| Epigenome ID |         |            |         |                                                         |
|--------------|---------|------------|---------|---------------------------------------------------------|
| EID          | Color   | Group      | Anatomy | Standardized epigenome name                             |
| E020         | #69608A | iPSC       | IPSC    | iPS-20b Cells                                           |
| E019         | #69608A | iPSC       | IPSC    | iPS-18 Cells                                            |
| E018         | #69608A | iPSC       | IPSC    | iPS-15b Cells                                           |
| E021         | #69608A | iPSC       | IPSC    | iPS DF 6.9 Cells                                        |
| E022         | #69608A | iPSC       | IPSC    | iPS DF 19.11 Cells                                      |
| E054         | #FFD924 | Neurosph   | BRAIN   | Ganglion Eminence derived primary cultured neurospheres |
| E053         | #FFD924 | Neurosph   | BRAIN   | Cortex derived primary cultured neurospheres            |
| E071         | #C5912B | Brain      | BRAIN   | Brain Hippocampus Middle                                |
| E074         | #C5912B | Brain      | BRAIN   | Brain Substantia Nigra                                  |
| E068         | #C5912B | Brain      | BRAIN   | Brain Anterior Caudate                                  |
| E069         | #C5912B | Brain      | BRAIN   | Brain Cingulate Gyrus                                   |
| E072         | #C5912B | Brain      | BRAIN   | Brain Inferior Temporal Lobe                            |
| E067         | #C5912B | Brain      | BRAIN   | Brain Angular Gyrus                                     |
| E073         | #C5912B | Brain      | BRAIN   | Brain_Dorsolateral_Prefrontal_Cortex                    |
| E070         | #C5912B | Brain      | BRAIN   | Brain Germinal Matrix                                   |
| E082         | #C5912B | Brain      | BRAIN   | Fetal Brain Female                                      |
| E081         | #C5912B | Brain      | BRAIN   | Fetal Brain Male                                        |
| E125         | #000000 | ENCODE2012 | BRAIN   | NH-A Astrocytes Primary Cells                           |

\*When 15-core chromatin state is included in the plot and >30 cell types are selected, the labels of Y-axis are omitted. The order of the cell types is same as the legend table.

# Chromosome 7

## EAS

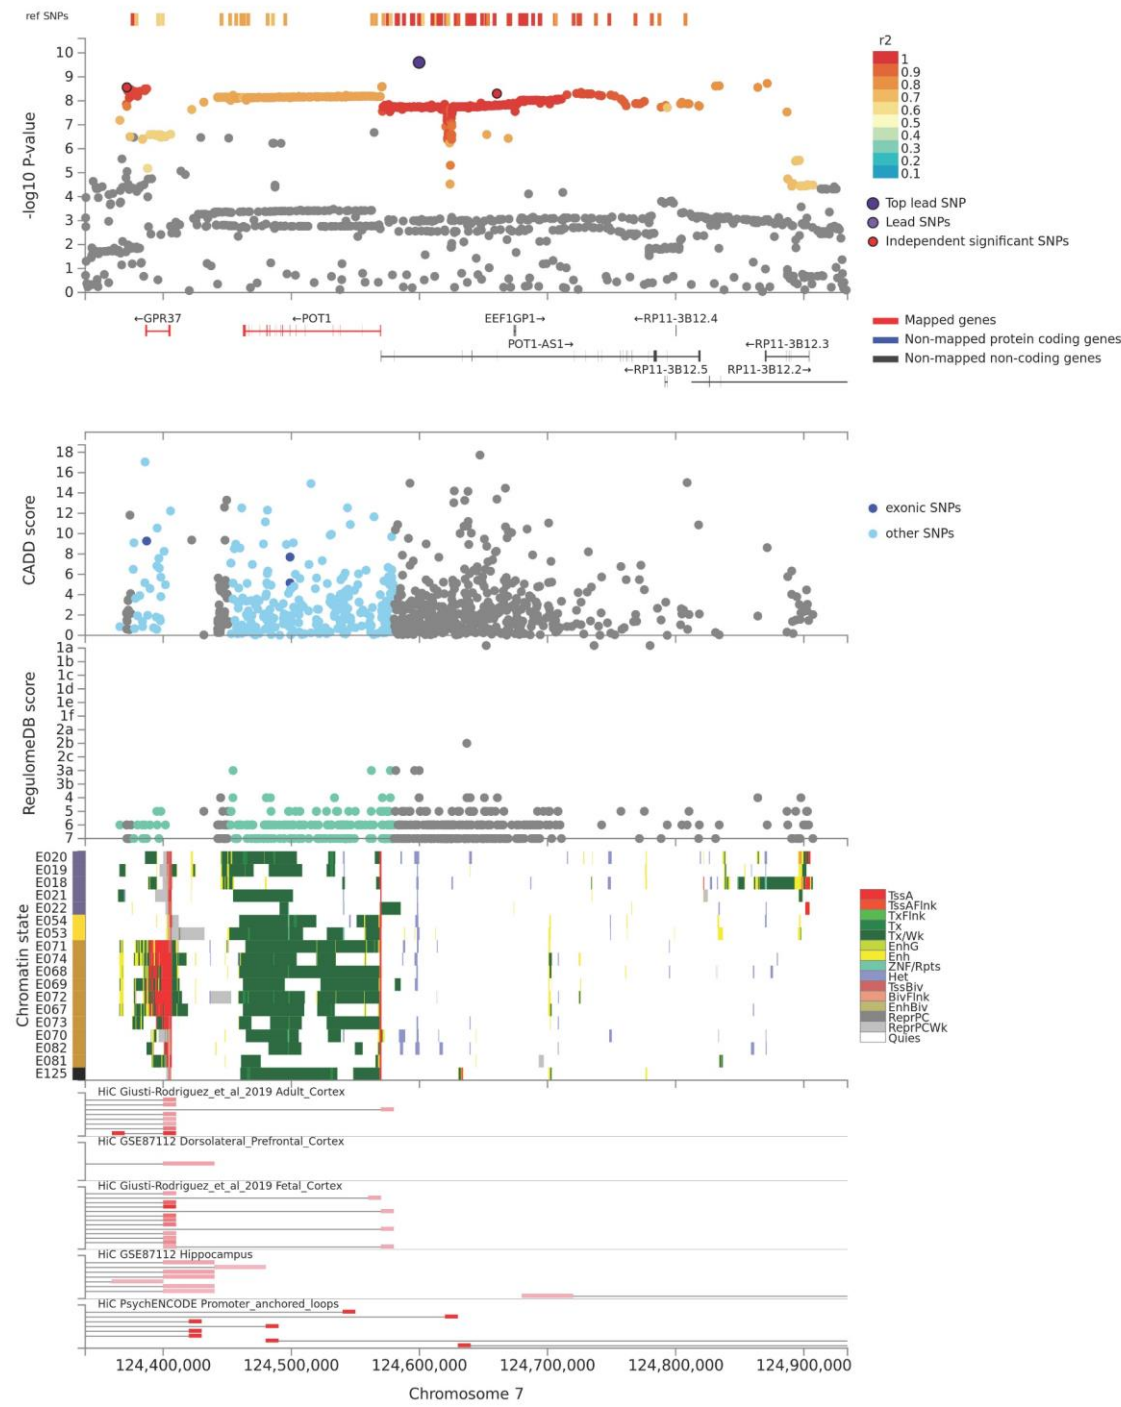

### Regulome DB

#### RegulomeDB Categorical Scores

| Category | Description                                                                                                                                       |
|----------|---------------------------------------------------------------------------------------------------------------------------------------------------|
| 1a       | Likely to affect binding and linked to expression of a gene target<br>eQTL + TF binding + matched TF motif + matched DNase footprint + DNase peak |
| 1b       | eQTL + TF binding + any motif + DNase footprint + DNase peak                                                                                      |
| 1c       | eQTL + TF binding + matched TF motif + DNase peak                                                                                                 |
| 1d       | eQTL + TF binding + any motif + DNase peak                                                                                                        |
| 1e       | eQTL + TF binding + matched TF motif                                                                                                              |
| 1f       | eQTL + TF binding/DNase peak                                                                                                                      |
| 2a       | Likely to affect binding<br>TF binding + matched TF motif + matched DNase footprint + DNase peak                                                  |
| 2b       | TF binding + any motif + DNase footprint + DNase peak                                                                                             |
| 2c       | TF binding + matched TF motif + DNase peak                                                                                                        |
| 3a       | Less likely to affect binding<br>TF binding + any motif + DNase peak                                                                              |
| 3b       | TF binding + matched TF motif                                                                                                                     |
| 4        | Minimal binding evidence<br>TF binding + DNase peak                                                                                               |
| 5        | TF binding or DNase peak                                                                                                                          |
| 6        | Motif hit                                                                                                                                         |
| 7        | No binding evidence                                                                                                                               |
| NA       | No evidence<br>the variant does not exist in RegulomeDB                                                                                           |

### 15-core chromatin state

| Epigenome ID |         |            |         |                                                         |
|--------------|---------|------------|---------|---------------------------------------------------------|
| EID          | Color   | Group      | Anatomy | Standardized epigenome name                             |
| E020         | #69608A | iPSC       | IPSC    | iPS-20b Cells                                           |
| E019         | #69608A | iPSC       | IPSC    | iPS-18 Cells                                            |
| E018         | #69608A | iPSC       | IPSC    | iPS-15b Cells                                           |
| E021         | #69608A | iPSC       | IPSC    | iPS DF 6.9 Cells                                        |
| E022         | #69608A | iPSC       | IPSC    | iPS DF 19.11 Cells                                      |
| E054         | #FFD924 | Neurosph   | BRAIN   | Ganglion Eminence derived primary cultured neurospheres |
| E053         | #FFD924 | Neurosph   | BRAIN   | Cortex derived primary cultured neurospheres            |
| E071         | #C5912B | Brain      | BRAIN   | Brain Hippocampus Middle                                |
| E074         | #C5912B | Brain      | BRAIN   | Brain Substantia Nigra                                  |
| E068         | #C5912B | Brain      | BRAIN   | Brain Anterior Caudate                                  |
| E069         | #C5912B | Brain      | BRAIN   | Brain Cingulate Gyrus                                   |
| E072         | #C5912B | Brain      | BRAIN   | Brain Inferior Temporal Lobe                            |
| E067         | #C5912B | Brain      | BRAIN   | Brain Angular Gyrus                                     |
| E073         | #C5912B | Brain      | BRAIN   | Brain_Dorsolateral_Prefrontal_Cortex                    |
| E070         | #C5912B | Brain      | BRAIN   | Brain Germinal Matrix                                   |
| E082         | #C5912B | Brain      | BRAIN   | Fetal Brain Female                                      |
| E081         | #C5912B | Brain      | BRAIN   | Fetal Brain Male                                        |
| E125         | #000000 | ENCODE2012 | BRAIN   | NH-A Astrocytes Primary Cells                           |

\*External link to RegulomeDB from SNP table (when one of the SNPs is clicked) will open a new tab. rsID does not always match since RegulomeDB used dbSNP build 141 (the rsID in FUMA is dbSNP build 146). Genomic position (bp on hg19) shown in the link of RegulomeDB is the position shown in the SNP table - 1, since RegulomeDB used 0 based coordinate.

\*When 15-core chromatin state is included in the plot and >30 cell types are selected, the labels of Y-axis are omitted. The order of the cell types is same as the legend table.



# Chromosome 10

## EAS

## EUR

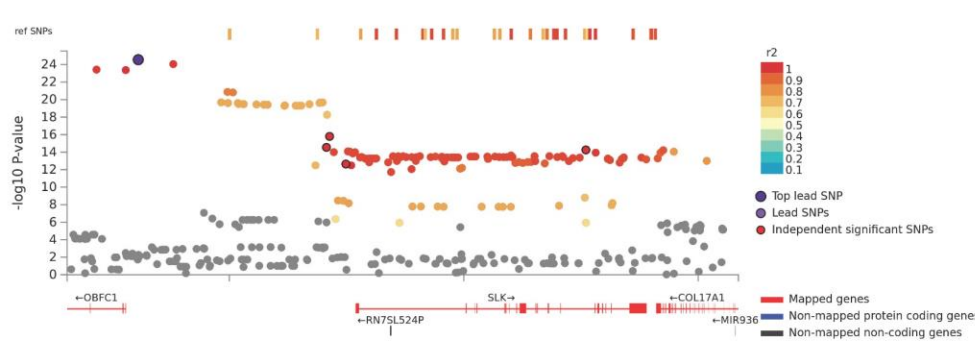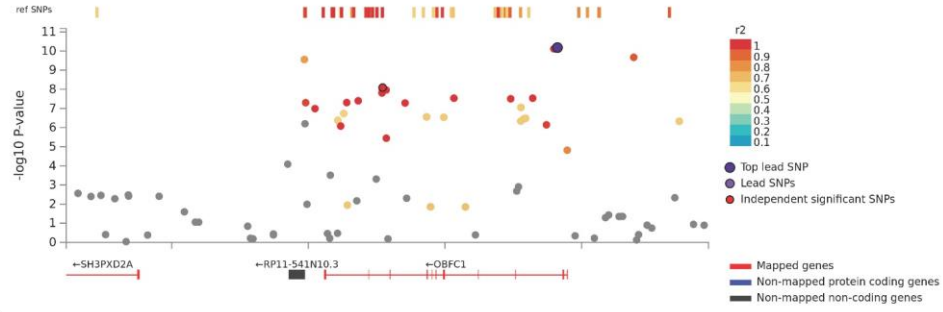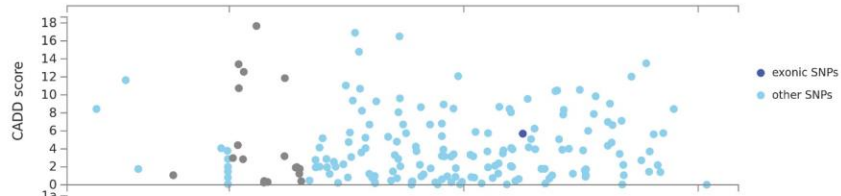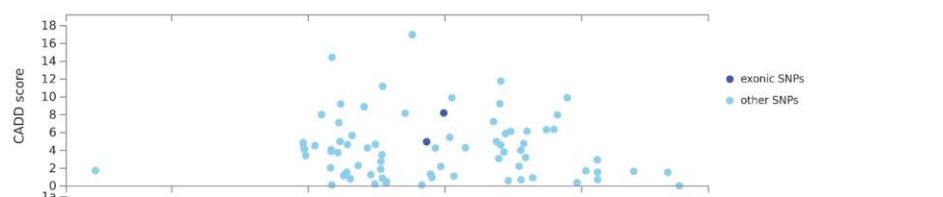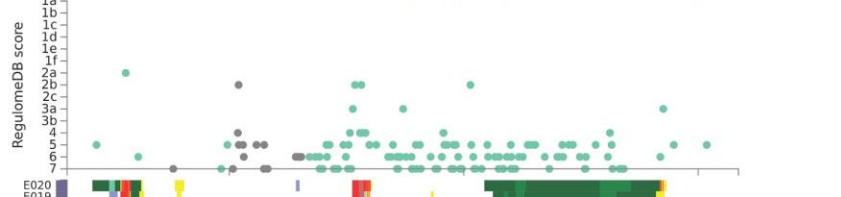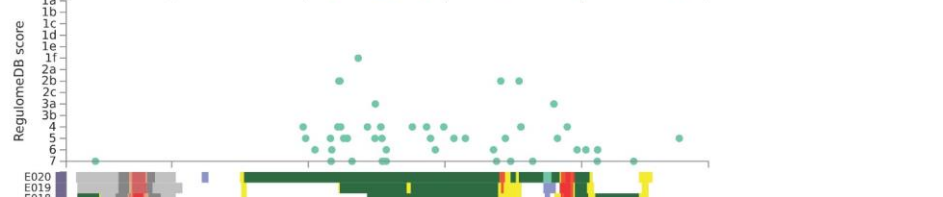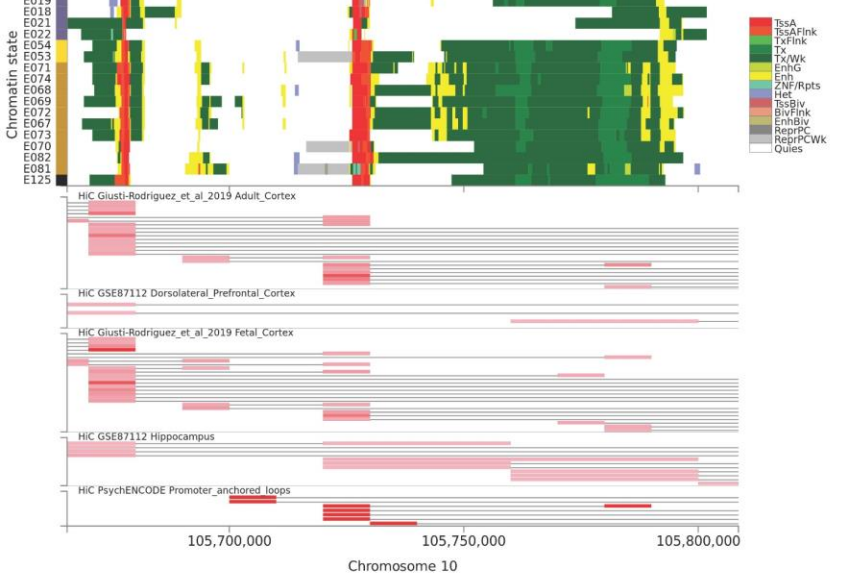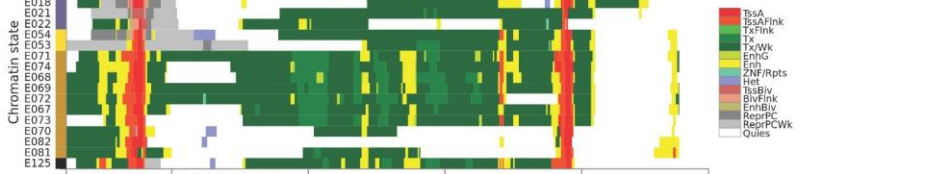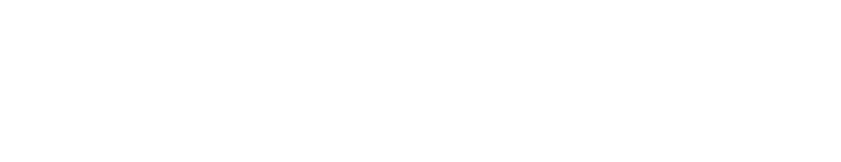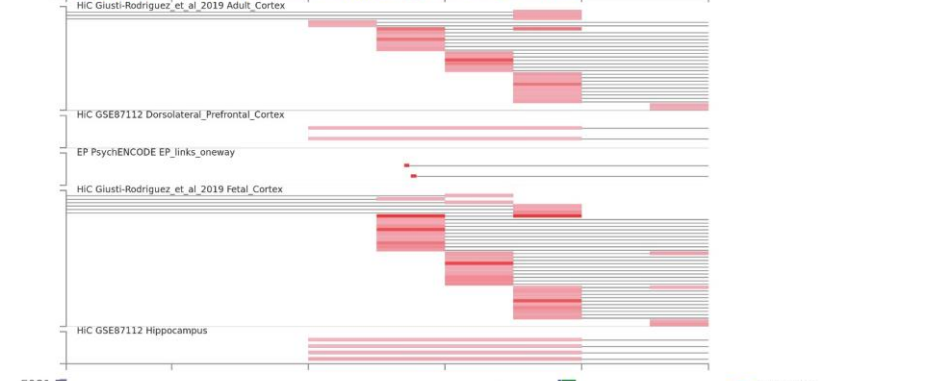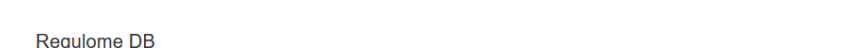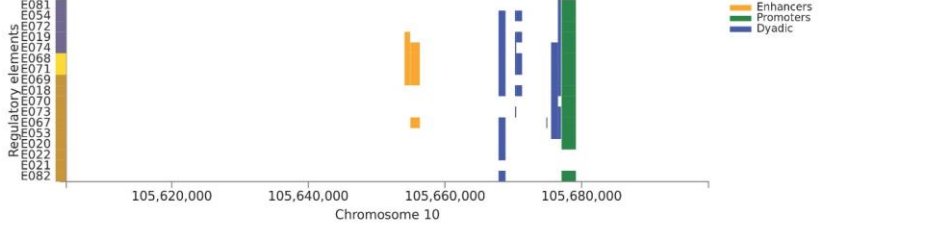

### Regulome DB

| Category | Description                                                                 |
|----------|-----------------------------------------------------------------------------|
| 1a       | Likely to affect binding and linked to expression of a gene target          |
| 1b       | eQTL + TF binding + matched TF motif + matched DNase footprint + DNase peak |
| 1c       | eQTL + TF binding + any motif + DNase footprint + DNase peak                |
| 1d       | eQTL + TF binding + matched TF motif + DNase peak                           |
| 1e       | eQTL + TF binding + any motif + DNase peak                                  |
| 1f       | eQTL + TF binding + matched TF motif                                        |
| 2a       | Likely to affect binding                                                    |
| 2b       | TF binding + matched TF motif + matched DNase footprint + DNase peak        |
| 2c       | TF binding + any motif + DNase footprint + DNase peak                       |
| 3a       | Less likely to affect binding                                               |
| 3b       | TF binding + any motif + DNase peak                                         |
| 3c       | TF binding + matched TF motif                                               |
| 4        | Minimal binding evidence                                                    |
| 5        | TF binding + DNase peak                                                     |
| 6        | TF binding or DNase peak                                                    |
| 7        | Motif hit                                                                   |
| NA       | No binding evidence                                                         |
| NA       | No evidence                                                                 |
| NA       | the variant does not exist in RegulomeDB                                    |

\*External link to RegulomeDB from SNP table (when one of the SNPs is clicked) will open a new tab. rsID does not always match since RegulomeDB used dbSNP build 141 (the rsID in FUMA is dbSNP build 146). Genomic position (bp on hg19) shown in the link of RegulomeDB is the position shown in the SNP table - 1, since RegulomeDB used 0 based coordinate.

### 15-core chromatin state

| EID  | Color   | Group      | Anatomy | Standardized epigenome name                             |
|------|---------|------------|---------|---------------------------------------------------------|
| E020 | #89608A | iPSC       | IPSC    | iPS-20b Cells                                           |
| E019 | #89608A | iPSC       | IPSC    | iPS-18 Cells                                            |
| E018 | #89608A | iPSC       | IPSC    | iPS-15b Cells                                           |
| E021 | #89608A | iPSC       | IPSC    | iPS DF 6.9 Cells                                        |
| E022 | #89608A | iPSC       | IPSC    | iPS DF 19.11 Cells                                      |
| E054 | #FFD924 | Neurosph   | BRAIN   | Ganglion Eminence derived primary cultured neurospheres |
| E053 | #FFD924 | Neurosph   | BRAIN   | Cortex derived primary cultured neurospheres            |
| E071 | #C5912B | Brain      | BRAIN   | Brain Hippocampus Middle                                |
| E074 | #C5912B | Brain      | BRAIN   | Brain Substantia Nigra                                  |
| E068 | #C5912B | Brain      | BRAIN   | Brain Anterior Caudate                                  |
| E069 | #C5912B | Brain      | BRAIN   | Brain Cingulate Gyrus                                   |
| E072 | #C5912B | Brain      | BRAIN   | Brain Inferior Temporal Lobe                            |
| E067 | #C5912B | Brain      | BRAIN   | Brain Angular Gyrus                                     |
| E073 | #C5912B | Brain      | BRAIN   | Brain_Dorsolateral_Prefrontal_Cortex                    |
| E070 | #C5912B | Brain      | BRAIN   | Brain Germinal Matrix                                   |
| E082 | #C5912B | Brain      | BRAIN   | Fetal Brain Female                                      |
| E081 | #C5912B | Brain      | BRAIN   | Fetal Brain Male                                        |
| E125 | #000000 | ENCODE2012 | BRAIN   | NH-A Astrocytes Primary Cells                           |

\*When 15-core chromatin state is included in the plot and >30 cell types are selected, the labels of Y-axis are omitted. The order of the cell types is same as the legend table.

# Chromosome 11

## EAS

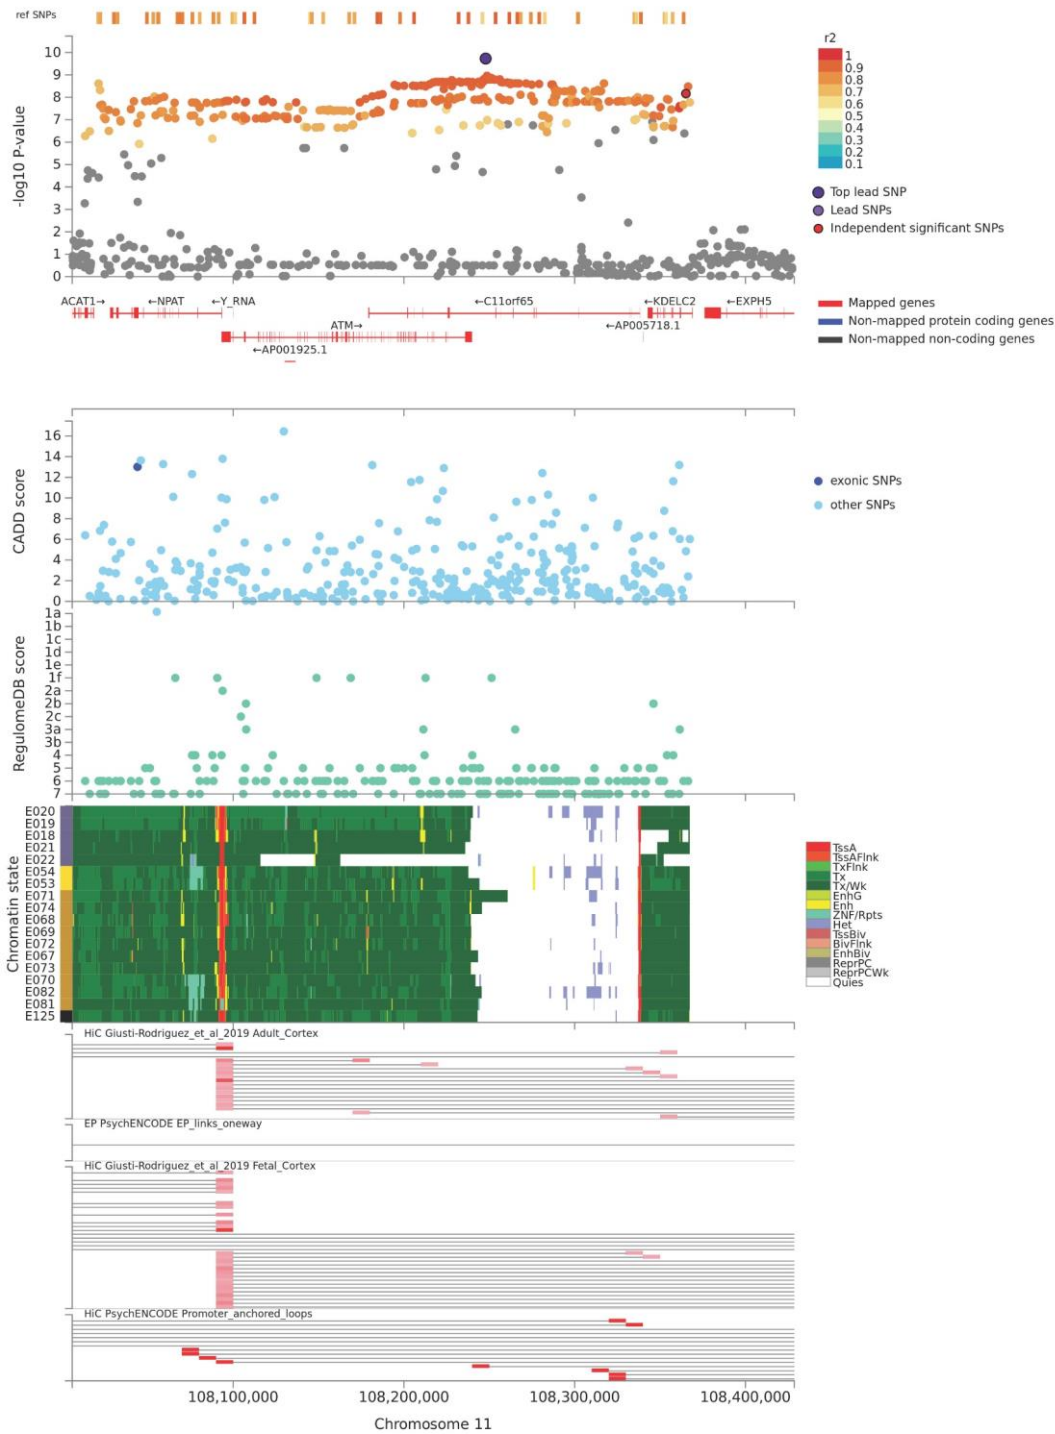

### Regulome DB

| Category | Description                                                                                                                                       |
|----------|---------------------------------------------------------------------------------------------------------------------------------------------------|
| 1a       | Likely to affect binding and linked to expression of a gene target<br>eQTL + TF binding + matched TF motif + matched DNase footprint + DNase peak |
| 1b       | eQTL + TF binding + any motif + DNase footprint + DNase peak                                                                                      |
| 1c       | eQTL + TF binding + matched TF motif + DNase peak                                                                                                 |
| 1d       | eQTL + TF binding + any motif + DNase peak                                                                                                        |
| 1e       | eQTL + TF binding + matched TF motif                                                                                                              |
| 1f       | eQTL + TF binding/DNase peak                                                                                                                      |
| 2a       | Likely to affect binding<br>TF binding + matched TF motif + matched DNase footprint + DNase peak                                                  |
| 2b       | TF binding + any motif + DNase footprint + DNase peak                                                                                             |
| 2c       | TF binding + matched TF motif + DNase peak                                                                                                        |
| 3a       | Less likely to affect binding<br>TF binding + any motif + DNase peak                                                                              |
| 3b       | TF binding + matched TF motif                                                                                                                     |
| 4        | Minimal binding evidence<br>TF binding + DNase peak                                                                                               |
| 5        | TF binding or DNase peak                                                                                                                          |
| 6        | Motif hit                                                                                                                                         |
| 7        | No binding evidence                                                                                                                               |
| NA       | No evidence<br>the variant does not exist in RegulomeDB                                                                                           |

### 15-core chromatin state

| Epigenome ID |         |            |         |                                                         |
|--------------|---------|------------|---------|---------------------------------------------------------|
| EID          | Color   | Group      | Anatomy | Standardized epigenome name                             |
| E020         | #69608A | iPSC       | IPSC    | iPS-20b Cells                                           |
| E019         | #69608A | iPSC       | IPSC    | iPS-18 Cells                                            |
| E018         | #69608A | iPSC       | IPSC    | iPS-15b Cells                                           |
| E021         | #69608A | iPSC       | IPSC    | iPS DF 6.9 Cells                                        |
| E022         | #69608A | iPSC       | IPSC    | iPS DF 19.11 Cells                                      |
| E054         | #FFD924 | Neurosph   | BRAIN   | Ganglion Eminence derived primary cultured neurospheres |
| E053         | #FFD924 | Neurosph   | BRAIN   | Cortex derived primary cultured neurospheres            |
| E071         | #C5912B | Brain      | BRAIN   | Brain Hippocampus Middle                                |
| E074         | #C5912B | Brain      | BRAIN   | Brain Substantia Nigra                                  |
| E068         | #C5912B | Brain      | BRAIN   | Brain Anterior Caudate                                  |
| E069         | #C5912B | Brain      | BRAIN   | Brain Cingulate Gyrus                                   |
| E072         | #C5912B | Brain      | BRAIN   | Brain Inferior Temporal Lobe                            |
| E067         | #C5912B | Brain      | BRAIN   | Brain Angular Gyrus                                     |
| E073         | #C5912B | Brain      | BRAIN   | Brain_Dorsolateral_Prefrontal_Cortex                    |
| E070         | #C5912B | Brain      | BRAIN   | Brain Germinal Matrix                                   |
| E082         | #C5912B | Brain      | BRAIN   | Fetal Brain Female                                      |
| E081         | #C5912B | Brain      | BRAIN   | Fetal Brain Male                                        |
| E125         | #000000 | ENCODE2012 | BRAIN   | NH-A Astrocytes Primary Cells                           |

\*External link to RegulomeDB from SNP table (when one of the SNPs is clicked) will open a new tab. rsID does not always match since RegulomeDB used dbSNP build 141 (the rsID in FUMA is dbSNP build 146). Genomic position (bp on hg19) shown in the link of RegulomeDB is the position shown in the SNP table - 1, since RegulomeDB used 0 based coordinate.

\*When 15-core chromatin state is included in the plot and >30 cell types are selected, the labels of Y-axis are omitted. The order of the cell types is same as the legend table.

# Chromosome 14

## EAS

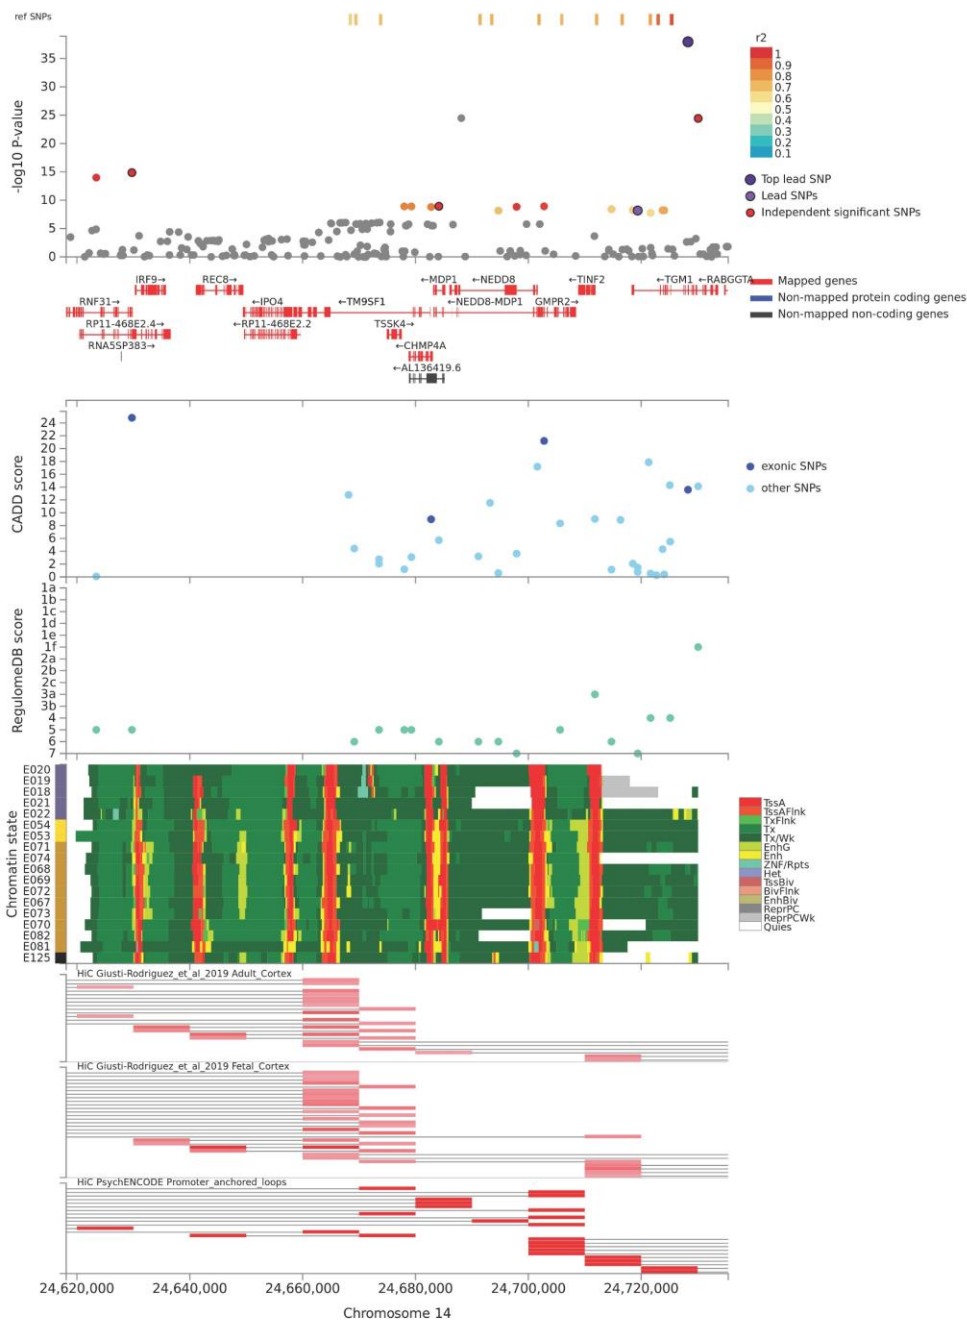

### Regulome DB

| Category | Description                                                                 |
|----------|-----------------------------------------------------------------------------|
| 1a       | Likely to affect binding and linked to expression of a gene target          |
| 1b       | eQTL + TF binding + matched TF motif + matched DNase footprint + DNase peak |
| 1c       | eQTL + TF binding + any motif + DNase footprint + DNase peak                |
| 1d       | eQTL + TF binding + matched TF motif + DNase peak                           |
| 1e       | eQTL + TF binding + any motif + DNase peak                                  |
| 1f       | eQTL + TF binding + matched TF motif                                        |
| 2a       | Likely to affect binding                                                    |
| 2b       | TF binding + matched TF motif + matched DNase footprint + DNase peak        |
| 2c       | TF binding + any motif + DNase footprint + DNase peak                       |
| 3a       | TF binding + matched TF motif + DNase peak                                  |
| 3b       | TF binding + any motif + DNase peak                                         |
| 3c       | TF binding + matched TF motif                                               |
| 4        | Less likely to affect binding                                               |
| 5        | TF binding + DNase peak                                                     |
| 6        | TF binding or DNase peak                                                    |
| 7        | Motif hit                                                                   |
| NA       | No binding evidence                                                         |
|          | No evidence                                                                 |
|          | the variant does not exist in RegulomeDB                                    |

\*External link to RegulomeDB from SNP table (when one of the SNPs is clicked) will open a new tab. rsID does not always match since RegulomeDB used dbSNP build 141 (the rsID in FUMA is dbSNP build 146). Genomic position (bp on hg19) shown in the link of RegulomeDB is the position shown in the SNP table - 1, since RegulomeDB used 0 based coordinate.

### 15-core chromatin state

| Epigenome ID |         |            |         |                                                         |
|--------------|---------|------------|---------|---------------------------------------------------------|
| EID          | Color   | Group      | Anatomy | Standardized epigenome name                             |
| E020         | #69608A | iPSC       | IPSC    | iPS-20b Cells                                           |
| E019         | #69608A | iPSC       | IPSC    | iPS-18 Cells                                            |
| E018         | #69608A | iPSC       | IPSC    | iPS-15b Cells                                           |
| E021         | #69608A | iPSC       | IPSC    | iPS DF 6.9 Cells                                        |
| E022         | #69608A | iPSC       | IPSC    | iPS DF 19.11 Cells                                      |
| E054         | #FFD924 | Neurosph   | BRAIN   | Ganglion Eminence derived primary cultured neurospheres |
| E053         | #FFD924 | Neurosph   | BRAIN   | Cortex derived primary cultured neurospheres            |
| E071         | #C5912B | Brain      | BRAIN   | Brain Hippocampus Middle                                |
| E074         | #C5912B | Brain      | BRAIN   | Brain Substantia Nigra                                  |
| E068         | #C5912B | Brain      | BRAIN   | Brain Anterior Caudate                                  |
| E069         | #C5912B | Brain      | BRAIN   | Brain Cingulate Gyrus                                   |
| E072         | #C5912B | Brain      | BRAIN   | Brain Inferior Temporal Lobe                            |
| E067         | #C5912B | Brain      | BRAIN   | Brain Angular Gyrus                                     |
| E073         | #C5912B | Brain      | BRAIN   | Brain_Dorsolateral_Prefrontal_Cortex                    |
| E070         | #C5912B | Brain      | BRAIN   | Brain Germinal Matrix                                   |
| E082         | #C5912B | Brain      | BRAIN   | Fetal Brain Female                                      |
| E081         | #C5912B | Brain      | BRAIN   | Fetal Brain Male                                        |
| E125         | #000000 | ENCODE2012 | BRAIN   | NH-A Astrocytes Primary Cells                           |

\*When 15-core chromatin state is included in the plot and >30 cell types are selected, the labels of Y-axis are omitted. The order of the cell types is same as the legend table.

# Chromosome 19

EUR

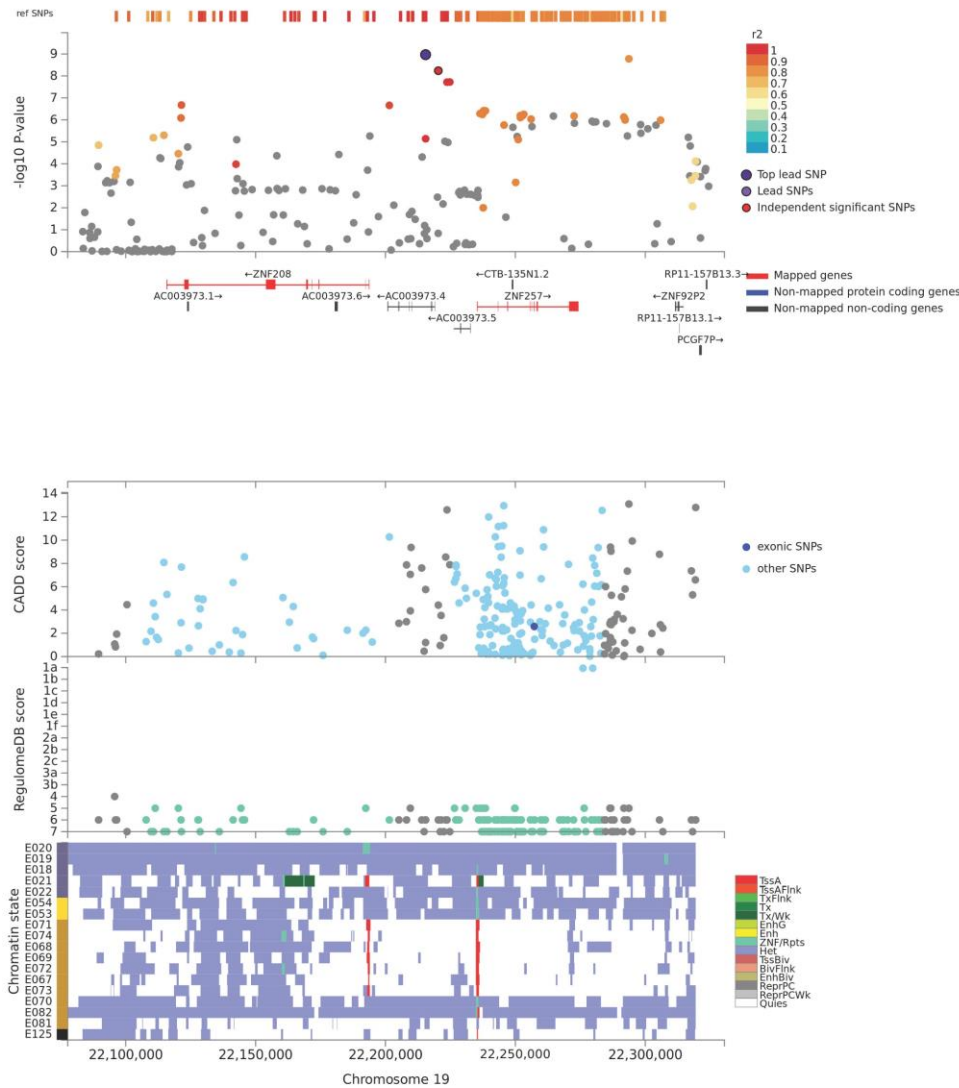

## Regulome DB

### RegulomeDB Categorical Scores

| Category | Description                                                                                                                                       |
|----------|---------------------------------------------------------------------------------------------------------------------------------------------------|
| 1a       | Likely to affect binding and linked to expression of a gene target<br>eQTL + TF binding + matched TF motif + matched DNase footprint + DNase peak |
| 1b       | eQTL + TF binding + any motif + DNase footprint + DNase peak                                                                                      |
| 1c       | eQTL + TF binding + matched TF motif + DNase peak                                                                                                 |
| 1d       | eQTL + TF binding + any motif + DNase peak                                                                                                        |
| 1e       | eQTL + TF binding + matched TF motif                                                                                                              |
| 1f       | eQTL + TF binding/DNase peak                                                                                                                      |
| 2a       | Likely to affect binding<br>TF binding + matched TF motif + matched DNase footprint + DNase peak                                                  |
| 2b       | TF binding + any motif + DNase footprint + DNase peak                                                                                             |
| 2c       | TF binding + matched TF motif + DNase peak                                                                                                        |
| 3a       | Less likely to affect binding<br>TF binding + any motif + DNase peak                                                                              |
| 3b       | TF binding + matched TF motif                                                                                                                     |
| 4        | Minimal binding evidence<br>TF binding + DNase peak                                                                                               |
| 5        | TF binding or DNase peak                                                                                                                          |
| 6        | Motif hit                                                                                                                                         |
| 7        | No binding evidence                                                                                                                               |
| NA       | No evidence<br>the variant does not exist in RegulomeDB                                                                                           |

\*External link to RegulomeDB from SNP table (when one of the SNPs is clicked) will open a new tab. rsID does not always match since RegulomeDB used dbSNP build 141 (the rsID in FUMA is dbSNP build 146). Genomic position (bp on hg19) shown in the link of RegulomeDB is the position shown in the SNP table - 1, since RegulomeDB used 0 based coordinate.

## 15-core chromatin state

| Epigenome ID |         | Color | Group      | Anatomy | Standardized epigenome name                             |
|--------------|---------|-------|------------|---------|---------------------------------------------------------|
| E020         | #69608A |       | iPSC       | IPSC    | iPS-20b Cells                                           |
| E019         | #69608A |       | iPSC       | IPSC    | iPS-18 Cells                                            |
| E018         | #69608A |       | iPSC       | IPSC    | iPS-15b Cells                                           |
| E021         | #69608A |       | iPSC       | IPSC    | iPS DF 6.9 Cells                                        |
| E022         | #69608A |       | iPSC       | IPSC    | iPS DF 19.11 Cells                                      |
| E054         | #FFD924 |       | Neurosph   | BRAIN   | Ganglion Eminence derived primary cultured neurospheres |
| E053         | #FFD924 |       | Neurosph   | BRAIN   | Cortex derived primary cultured neurospheres            |
| E071         | #C5912B |       | Brain      | BRAIN   | Brain Hippocampus Middle                                |
| E074         | #C5912B |       | Brain      | BRAIN   | Brain Substantia Nigra                                  |
| E068         | #C5912B |       | Brain      | BRAIN   | Brain Anterior Caudate                                  |
| E069         | #C5912B |       | Brain      | BRAIN   | Brain Cingulate Gyrus                                   |
| E072         | #C5912B |       | Brain      | BRAIN   | Brain Inferior Temporal Lobe                            |
| E067         | #C5912B |       | Brain      | BRAIN   | Brain Angular Gyrus                                     |
| E073         | #C5912B |       | Brain      | BRAIN   | Brain_Dorsolateral_Prefrontal_Cortex                    |
| E070         | #C5912B |       | Brain      | BRAIN   | Brain Germinal Matrix                                   |
| E082         | #C5912B |       | Brain      | BRAIN   | Fetal Brain Female                                      |
| E081         | #C5912B |       | Brain      | BRAIN   | Fetal Brain Male                                        |
| E125         | #000000 |       | ENCODE2012 | BRAIN   | NH-A Astrocytes Primary Cells                           |

\*When 15-core chromatin state is included in the plot and >30 cell types are selected, the labels of Y-axis are omitted. The order of the cell types is same as the legend table.

# Chromosome 20

## EAS

## EUR

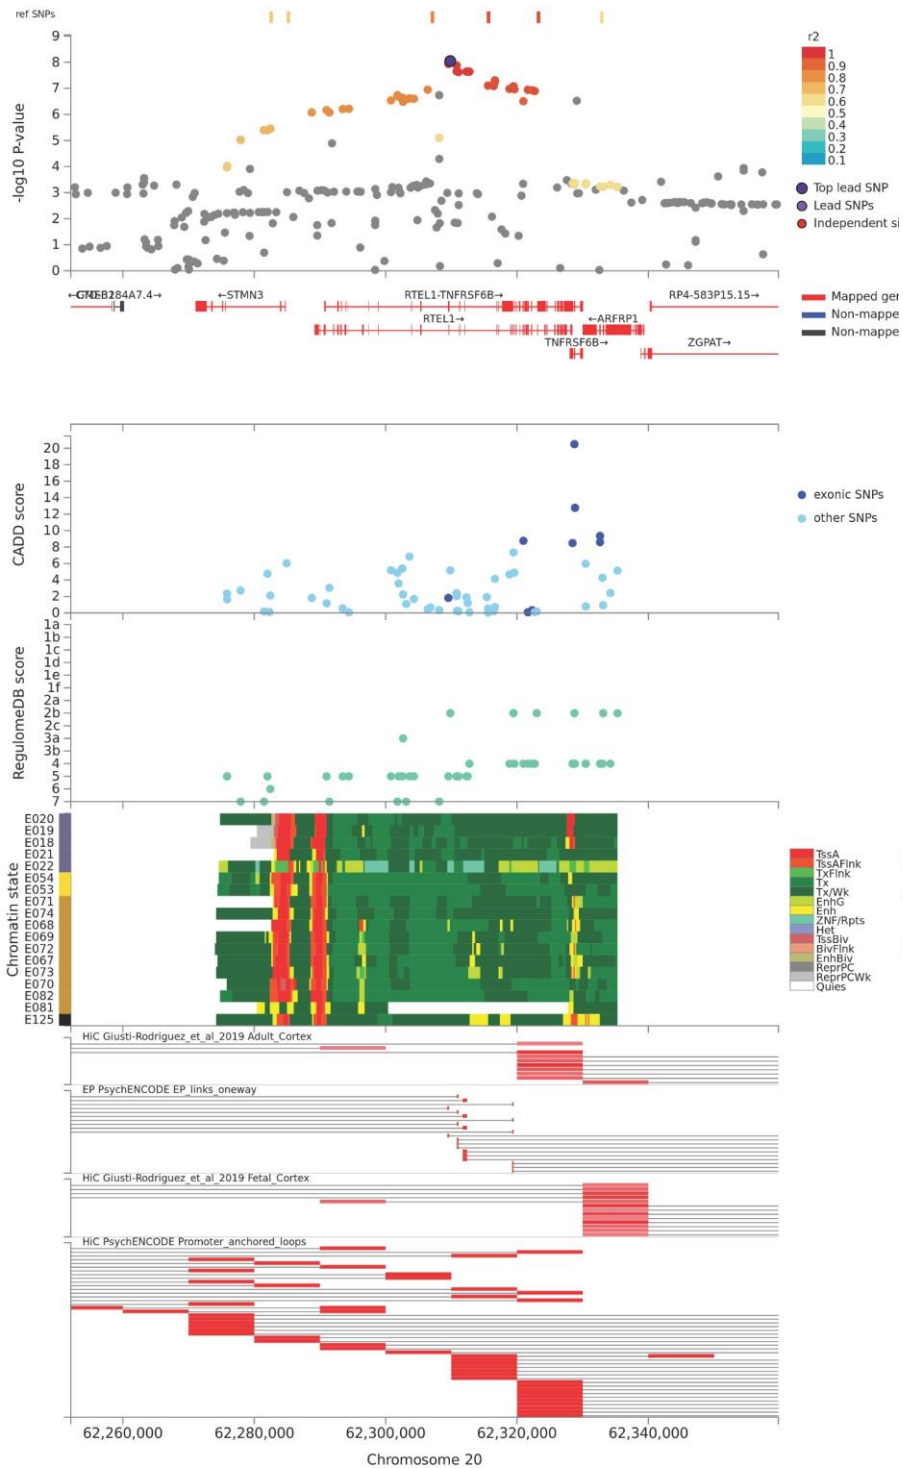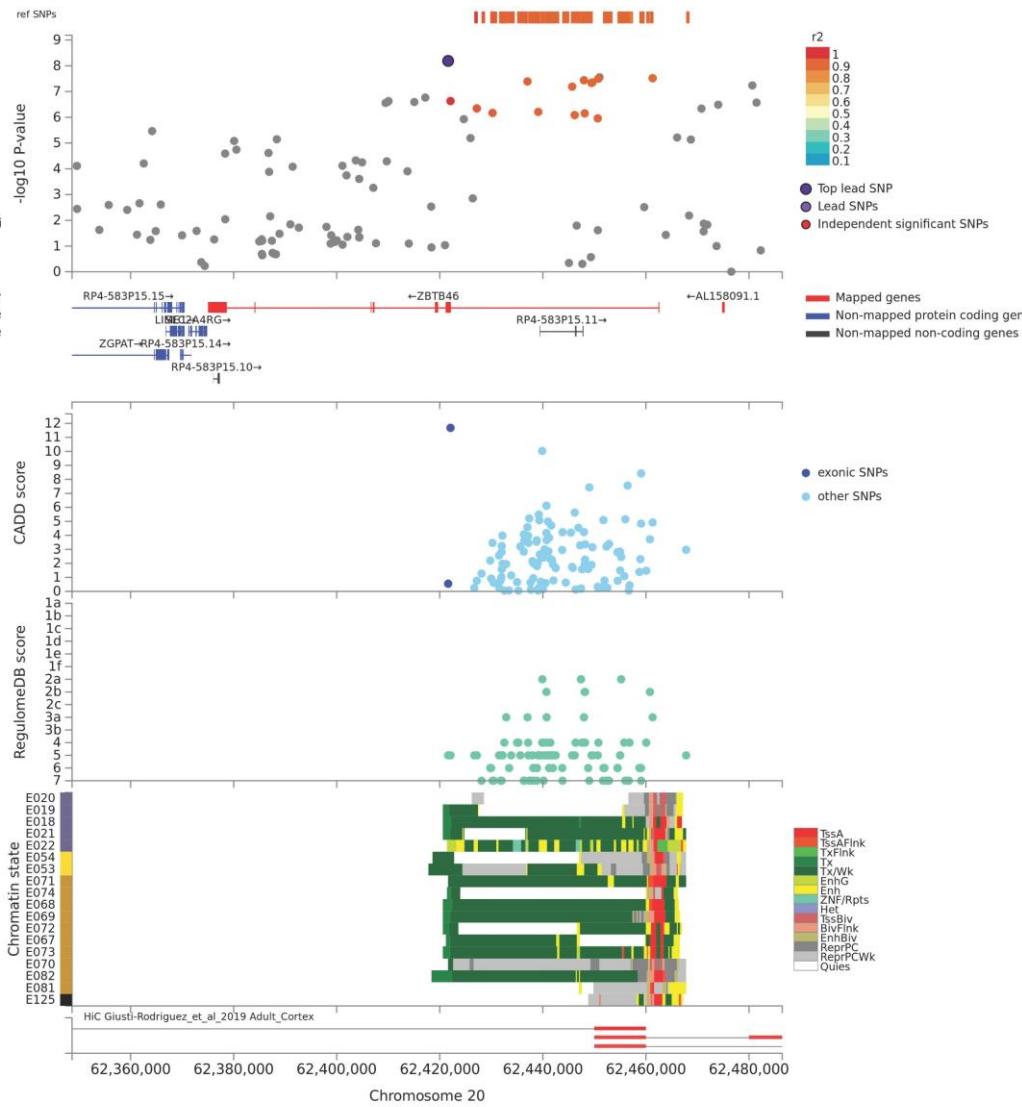

### Regulome DB

| Category | Description                                                                 |
|----------|-----------------------------------------------------------------------------|
| 1a       | Likely to affect binding and linked to expression of a gene target          |
| 1b       | eQTL + TF binding + matched TF motif + matched DNase footprint + DNase peak |
| 1c       | eQTL + TF binding + any motif + DNase footprint + DNase peak                |
| 1d       | eQTL + TF binding + matched TF motif + DNase peak                           |
| 1e       | eQTL + TF binding + any motif + DNase peak                                  |
| 1f       | eQTL + TF binding + matched TF motif                                        |
| 2a       | Likely to affect binding                                                    |
| 2b       | TF binding + matched TF motif + matched DNase footprint + DNase peak        |
| 2c       | TF binding + any motif + DNase footprint + DNase peak                       |
| 3a       | TF binding + matched TF motif + DNase peak                                  |
| 3b       | TF binding + any motif + DNase peak                                         |
| 3c       | TF binding + matched TF motif                                               |
| 4        | Less likely to affect binding                                               |
| 5        | TF binding + DNase peak                                                     |
| 6        | TF binding or DNase peak                                                    |
| 7        | Motif hit                                                                   |
| NA       | No binding evidence                                                         |
| 7        | No evidence                                                                 |
| NA       | the variant does not exist in RegulomeDB                                    |

### 15-core chromatin state

| Epigenome ID |         | Group      | Anatomy | Standardized epigenome name                             |
|--------------|---------|------------|---------|---------------------------------------------------------|
| EID          | Color   |            |         |                                                         |
| E020         | #69608A | iPSC       | IPSC    | iPS-20b Cells                                           |
| E019         | #69608A | iPSC       | IPSC    | iPS-18 Cells                                            |
| E018         | #69608A | iPSC       | IPSC    | iPS-15b Cells                                           |
| E021         | #69608A | iPSC       | IPSC    | iPS DF 6.9 Cells                                        |
| E022         | #69608A | iPSC       | IPSC    | iPS DF 19.11 Cells                                      |
| E054         | #FFD924 | Neurosph   | BRAIN   | Ganglion Eminence derived primary cultured neurospheres |
| E053         | #FFD924 | Neurosph   | BRAIN   | Cortex derived primary cultured neurospheres            |
| E071         | #C5912B | Brain      | BRAIN   | Brain Hippocampus Middle                                |
| E074         | #C5912B | Brain      | BRAIN   | Brain Substantia Nigra                                  |
| E068         | #C5912B | Brain      | BRAIN   | Brain Anterior Caudate                                  |
| E069         | #C5912B | Brain      | BRAIN   | Brain Cingulate Gyrus                                   |
| E072         | #C5912B | Brain      | BRAIN   | Brain Inferior Temporal Lobe                            |
| E067         | #C5912B | Brain      | BRAIN   | Brain Angular Gyrus                                     |
| E073         | #C5912B | Brain      | BRAIN   | Brain_Dorsolateral_Prefrontal_Cortex                    |
| E070         | #C5912B | Brain      | BRAIN   | Brain Germinal Matrix                                   |
| E082         | #C5912B | Brain      | BRAIN   | Fetal Brain Female                                      |
| E081         | #C5912B | Brain      | BRAIN   | Fetal Brain Male                                        |
| E125         | #000000 | ENCODE2012 | BRAIN   | NH-A Astrocytes Primary Cells                           |

\*External link to RegulomeDB from SNP table (when one of the SNPs is clicked) will open a new tab. rsID does not always match since RegulomeDB used dbSNP build 141 (the rsID in FUMA is dbSNP build 146). Genomic position (bp on hg19) shown in the link of RegulomeDB is the position shown in the SNP table - 1, since RegulomeDB used 0 based coordinate.

\*When 15-core chromatin state is included in the plot and >30 cell types are selected, the labels of Y-axis are omitted. The order of the cell types is same as the legend table.

# Chromatin mapping – Circos Plots

## Locus shared between both populations

EUR

EAS

Chromosome 3

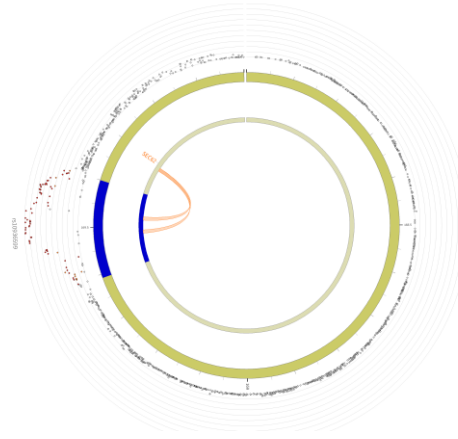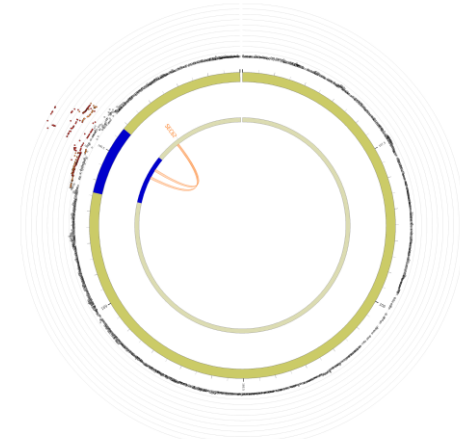

Chromosome 4

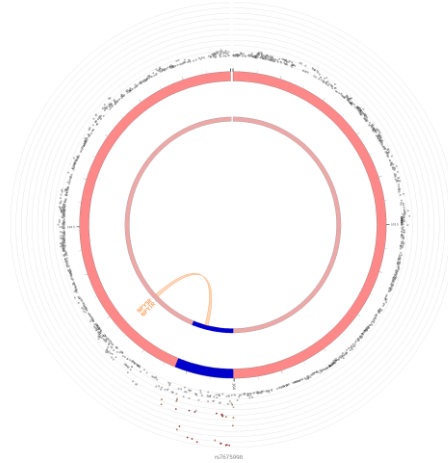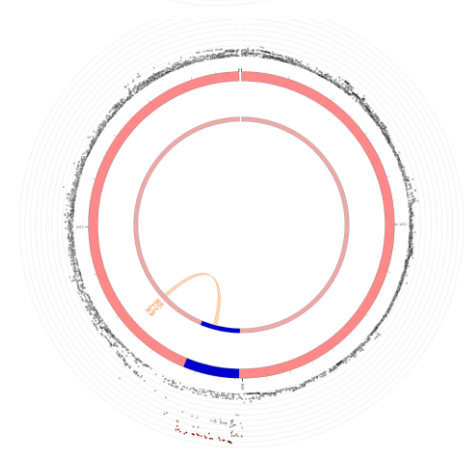

Chromosome 10

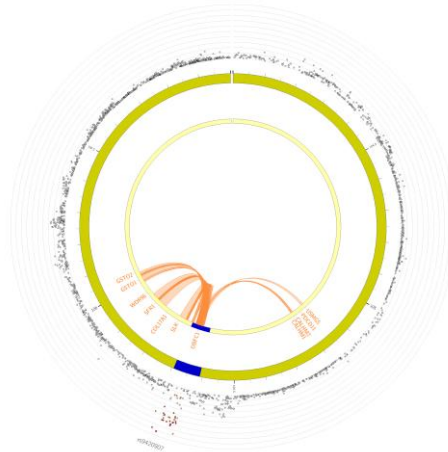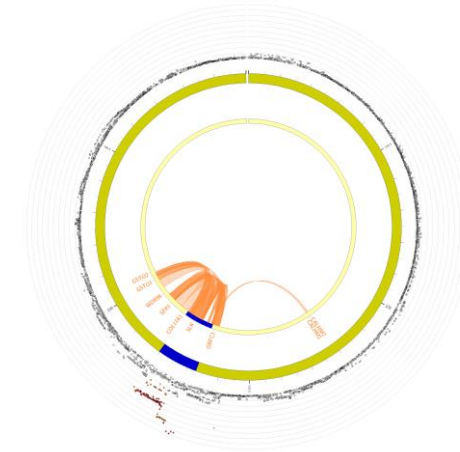

Chromosome 20

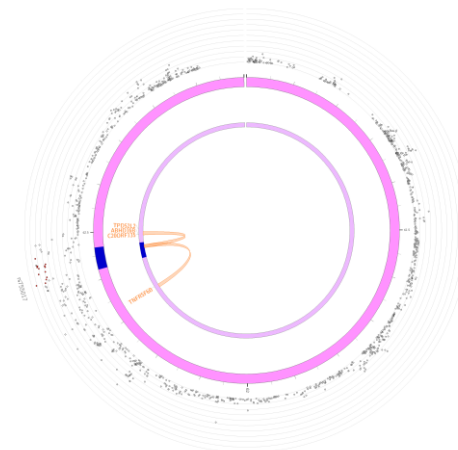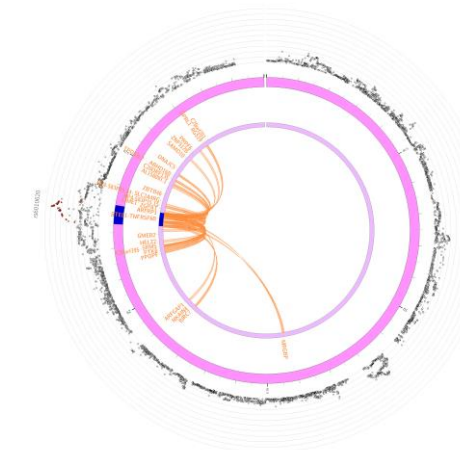

# Locus NOT shared between both populations

EUR

Chromosome 2

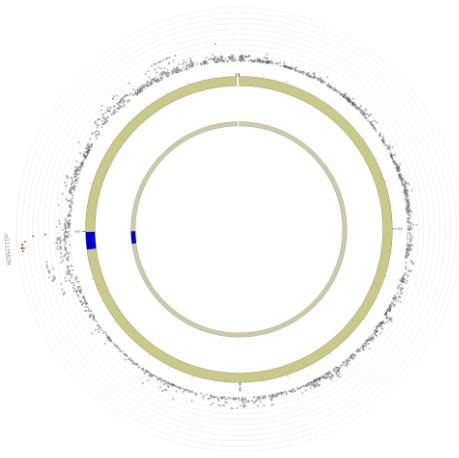

Chromosome 5

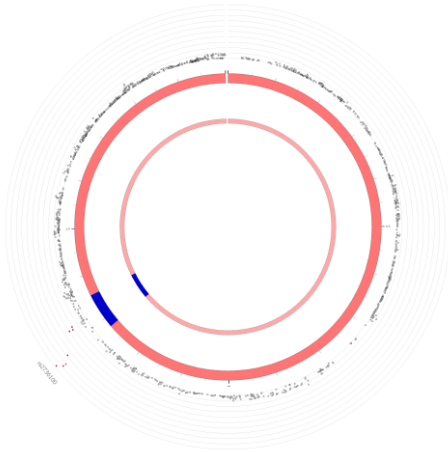

Chromosome 19

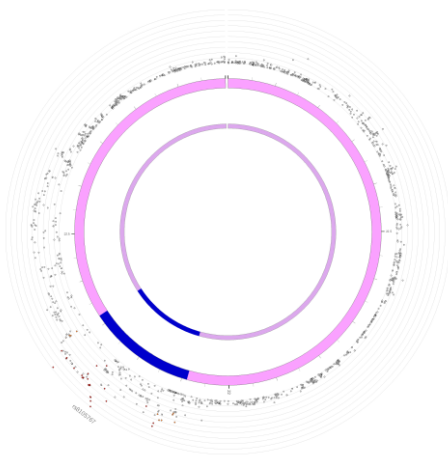

# Locus NOT shared between both populations

EAS

Chromosome 1

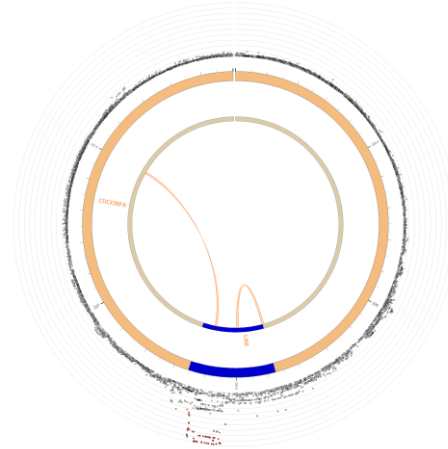

Chromosome 7

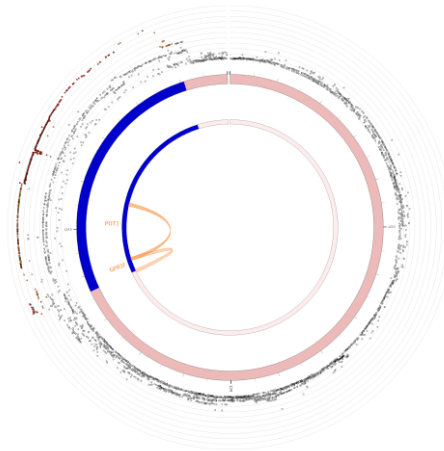

Chromosome 11

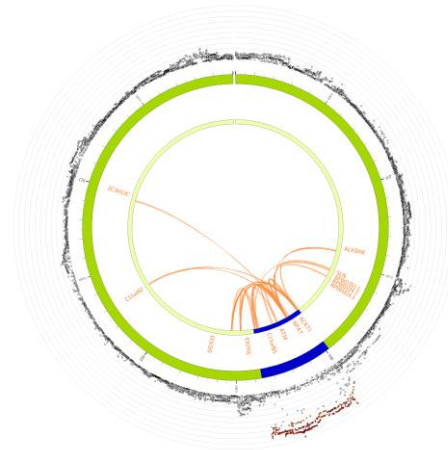

Chromosome 15

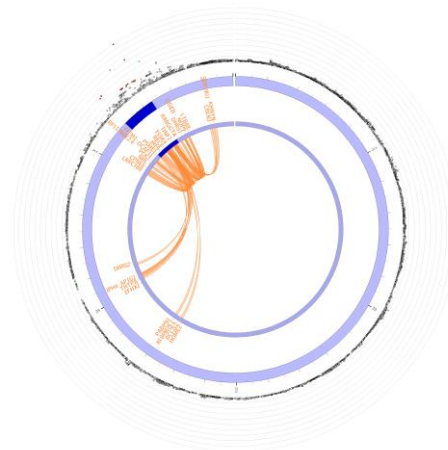

Supplement: supplementaryfile1_ddab102.pdf [file supplementaryfile1_ddab102.pdf]
