# Supplementary material
Source: PubMed Central journal article supplement (PMC8255129)

| CpG ID | Genomic Coordinate (hg19) | Chr      | Associated Genes | CpG in Feature | Cor Blood-BA7 | Cor Blood-BA10 | Cor Blood-BA20 | Mean Cor All Brain | SD Mean Cor All | Percentile of Mean | Percentile of Mean | Mean Change | Mean Change | Percentile rank of | Percentile rank of | Var in Blood | Var in All Brain | Var in BA7 | Var in BA10 | Var in BA20 |
|--------|---------------------------|----------|------------------|----------------|---------------|----------------|----------------|--------------------|-----------------|--------------------|--------------------|-------------|-------------|--------------------|--------------------|--------------|------------------|------------|-------------|-------------|
| 1      | cg0192052                 | 1.69E+08 | 3 ACTRT3         | intragenic     | -0.28529      | -0.16471       | -0.49706       | -0.31569           | 0.168248        | -                  | 90%                | 0           | 0.02        | <50%               | 75-90% (Brain)     | 0.027148     | 0.095309         | 0.066311   | 0.074639    | 0.10182     |
| 2      | cg0629427                 | 1.24E+08 | 7 GPR37          | intragenic     | -0.28824      | -0.00294       | -0.05294       | -0.11471           | 0.152346        | -                  | <50%               | 0.02        | 0.06        | 50-75% (Brain)     | 90% (Brain)        | 0.072983     | 0.249145         | 0.178842   | 0.278994    | 0.163316    |
| 3      | cg0819357                 | 1.7E+08  | 3 LRRC34         | intragenic     | 0.447059      | 0.558824       | 0.441176       | 0.482353           | 0.066291        | 90%                | -                  | 0.04        | 0.04        | 75-90% (Brain)     | 90% (Brain)        | 0.127189     | 0.136379         | 0.120043   | 0.138222    | 0.126796    |
| 4      | cg0083255                 | 1.7E+08  | 3 LRRC34         | intragenic     | 0.529412      | 0.1            | 0.126471       | 0.251961           | 0.240644        | 75-90%             | -                  | 0.02        | 0.01        | 50-75% (Brain)     | 50-75% (Brain)     | 0.072089     | 0.065075         | 0.073866   | 0.03225     | 0.055494    |
| 5      | cg1235852                 | 1.7E+08  | 3 LRRC34         | promoter       | -0.12647      | -0.06765       | 0.047059       | -0.04902           | 0.088252        | -                  | <50%               | 0           | 0           | <50% (Brain)       | <50% (Brain)       | 0.016803     | 0.017184         | 0.01909    | 0.015699    | 0.012274    |
| 6      | cg0809563                 | 1.7E+08  | 3 LRRC34         | promoter       | 0.264706      | 0.002941       | -0.17353       | 0.031373           | 0.220497        | <50%               | -                  | 0           | 0           | <50% (Brain)       | <50% (Brain)       | 0.008852     | 0.013789         | 0.015128   | 0.014062    | 0.010161    |
| 7      | cg1232414                 | 1.7E+08  | 3 LRRC34         | promoter       | 0.402941      | 0.220588       | -0.17647       | 0.14902            | 0.296262        | 50-75%             | -                  | 0.02        | 0.01        | 75-90% (Brain)     | 50-75% (Brain)     | 0.101411     | 0.128388         | 0.098344   | 0.110964    | 0.104191    |
| 8      | cg0336996                 | 1.7E+08  | 3 LRRC34         | promoter       | 0.008824      | 0.023529       | 0.202941       | 0.078431           | 0.108079        | <50%               | -                  | 0.03        | 0.02        | 75-90% (Brain)     | 75-90% (Brain)     | 0.126303     | 0.119049         | 0.07667    | 0.147694    | 0.0675      |
| 9      | cg1817109                 | 1.7E+08  | 3 None           | intergenic     | -0.20882      | -0.18235       | -0.11471       | -0.16863           | 0.048537        | -                  | 50-75%             | 0.01        | 0.01        | <50% (Brain)       | 75-90% (Brain)     | 0.0293       | 0.136339         | 0.118085   | 0.095679    | 0.13315     |
| 10     | cg1100555                 | 1.06E+08 | 10 OBFC1         | intragenic     | 0.288235      | 0.144118       | 0.214706       | 0.215686           | 0.072064        | 50-75%             | -                  | 0.02        | 0.04        | 50-75% (Brain)     | 90% (Brain)        | 0.094638     | 0.290632         | 0.281379   | 0.269243    | 0.284652    |
| 11     | cg0062441                 | 1282357  | 5 TERT           | intragenic     | -0.07059      | -0.02059       | -0.10882       | -0.06667           | 0.044248        | -                  | <50%               | 0.02        | 0.04        | 50-75% (Brain)     | 90% (Brain)        | 0.072427     | 0.142684         | 0.149954   | 0.169352    | 0.119533    |
| 12     | cg0393537                 | 1282703  | 5 TERT           | intragenic     | 0.055882      | -0.05588       | -0.59118       | -0.19706           | 0.34586         | -                  | 50-75%             | 0.01        | 0.04        | 50-75% (Brain)     | 90% (Brain)        | 0.056818     | 0.166135         | 0.148556   | 0.194885    | 0.112009    |
| 13     | cg0738002                 | 1296007  | 5 TERT           | promoter       | -0.28824      | 0.173529       | 0.011765       | -0.03431           | 0.234306        | -                  | <50%               | 0.02        | 0           | 50-75% (Brain)     | 50-75% (Brain)     | 0.100413     | 0.0651           | 0.067849   | 0.059821    | 0.054737    |
| 14     | cg0575134                 | 62405935 | 20 ZBTB46        | intragenic     | -0.58235      | 0.132353       | -0.23235       | -0.22745           | 0.357378        | -                  | 50-75%             | 0.02        | 0.01        | 50-75% (Brain)     | 75-90% (Brain)     | 0.063213     | 0.096965         | 0.063702   | 0.086945    | 0.117883    |
| 15     | cg1425126                 | 62406428 | 20 ZBTB46        | intragenic     | 0.267647      | 0.529412       | 0.455882       | 0.417647           | 0.135006        | 90%                | -                  | 0.06        | 0.01        | 90% (Brain)        | 50-75% (Brain)     | 0.215439     | 0.116059         | 0.110012   | 0.093078    | 0.124745    |
| 16     | cg0263091                 | 62436995 | 20 ZBTB46        | promoter       | 0.055882      | 0.138235       | -0.04412       | 0.05               | 0.091319        | <50%               | -                  | 0.02        | 0.01        | 50-75% (Brain)     | 50-75% (Brain)     | 0.074256     | 0.083229         | 0.057636   | 0.098675    | 0.054512    |
| 17     | cg2129198                 | 62437035 | 20 ZBTB46        | promoter       | 0.073529      | -0.2           | 0.032353       | -0.03137           | 0.14748         | -                  | <50%               | 0           | 0.04        | <50% (Brain)       | 90% (Brain)        | 0.029687     | 0.230601         | 0.094223   | 0.231544    | 0.091153    |

Tabular values for the significant CpG sites observed with Summary-based Mendelian Randomization, mined from BECon as displayed in Figure 4

**cg06294279**

Schizophrenia

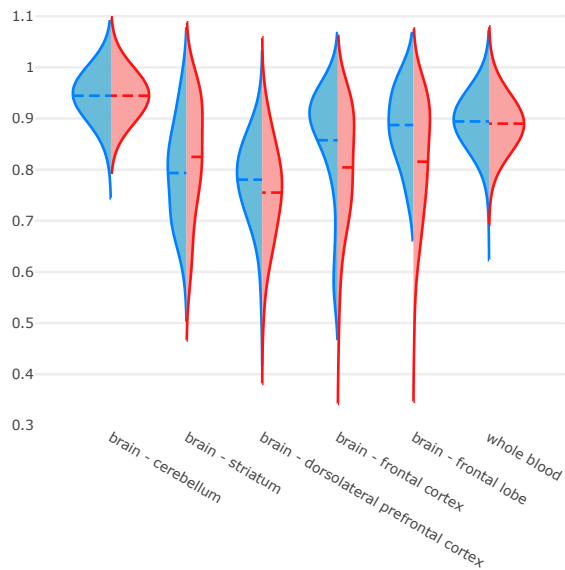

Alzheimer's disease

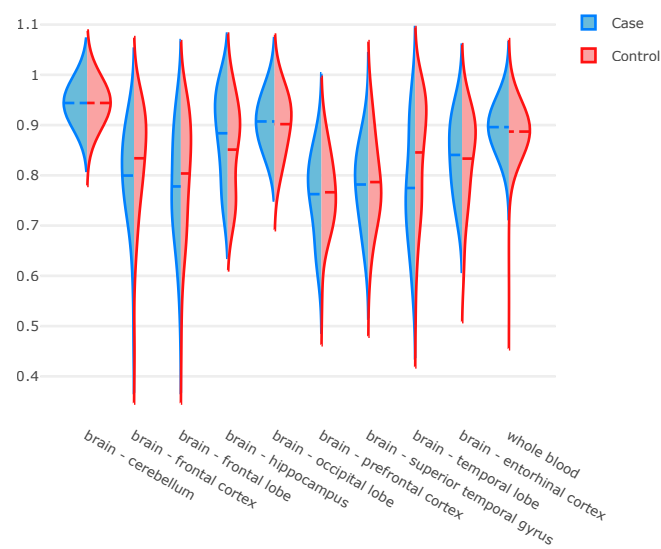**cg03935379**

Schizophrenia

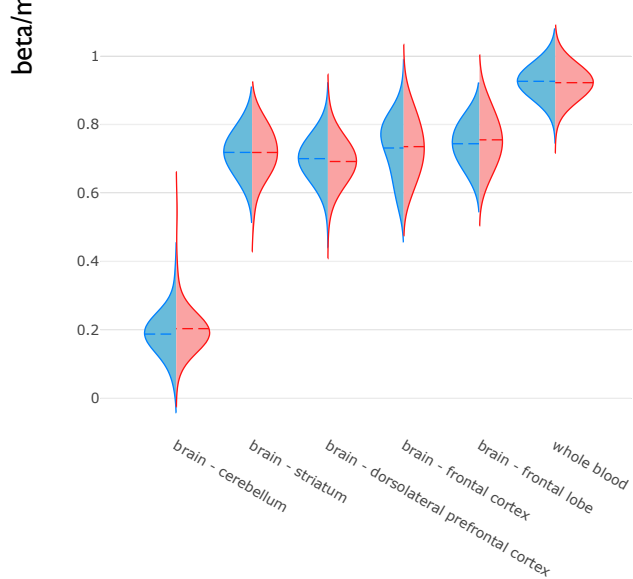

Parkinson's disease

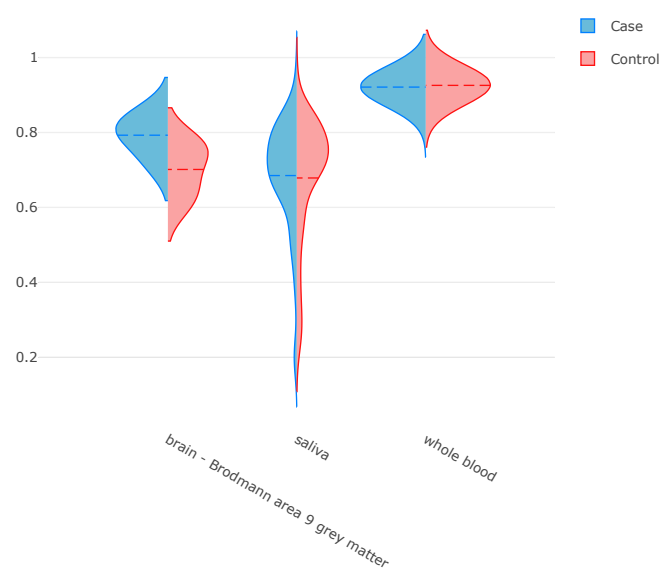

# cg00624418

## Alzheimer's disease

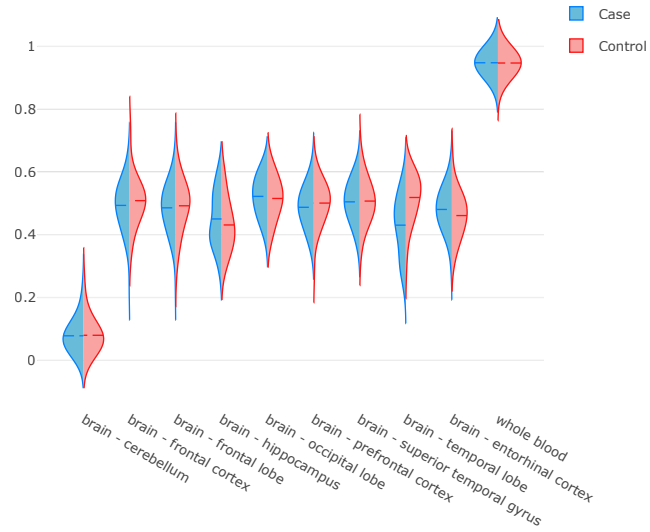

## schizophrenia

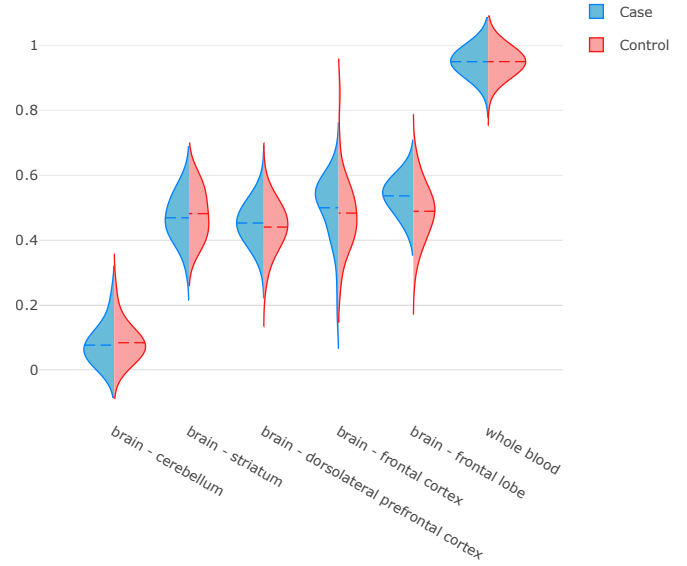

## Parkinson's disease

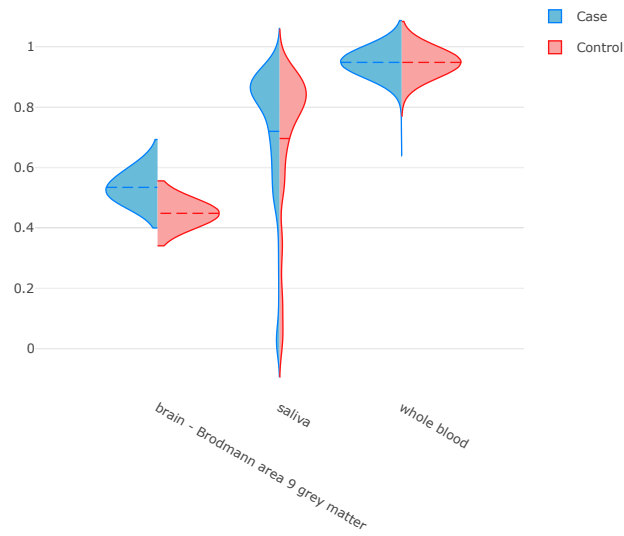

beta/m-value - methylation intensity

# cg00832555

## Alzheimer's disease

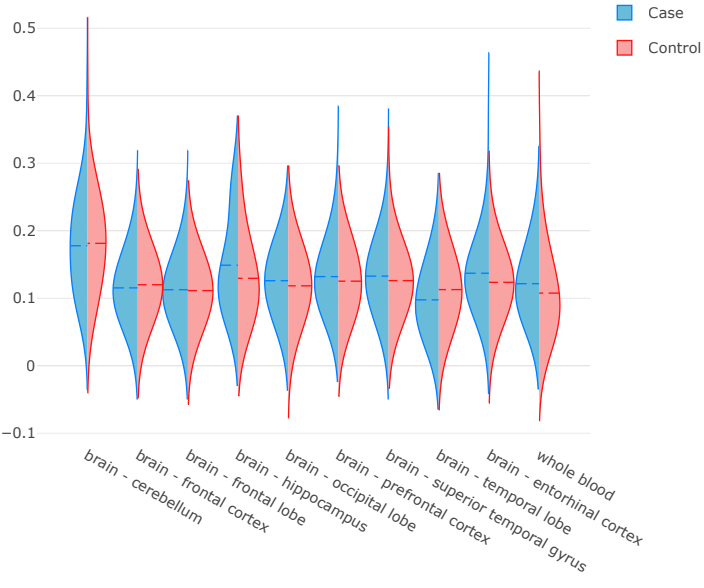

## schizophrenia

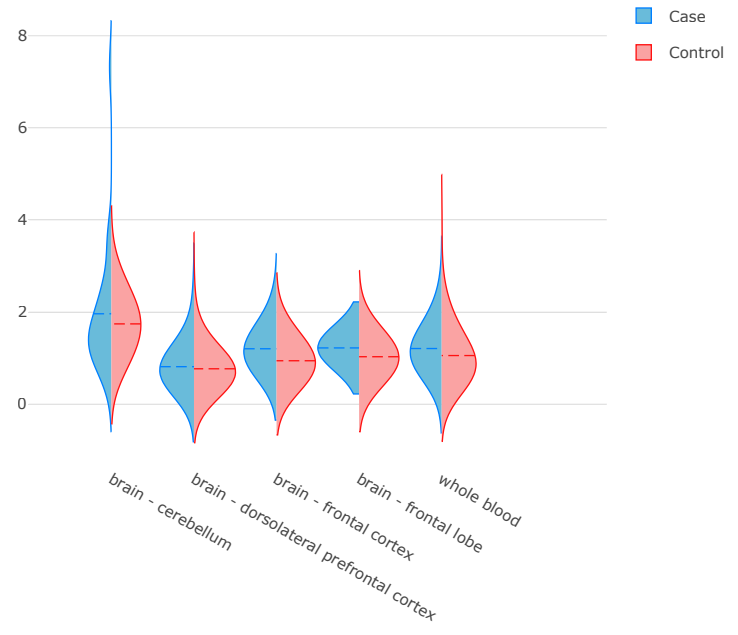

## Parkinson's disease

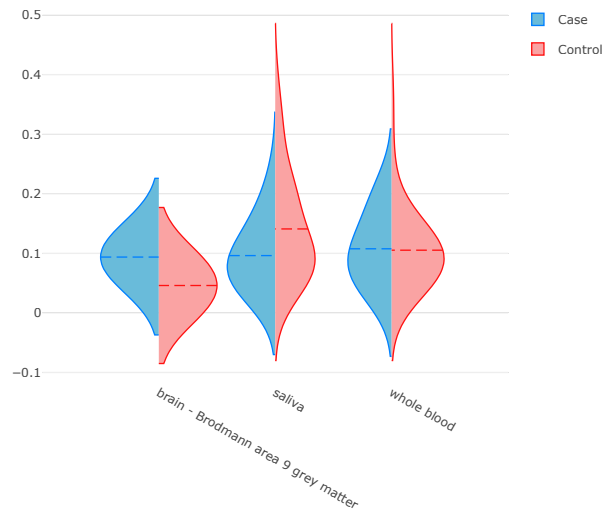

# cg01920524

## Alzheimer's disease

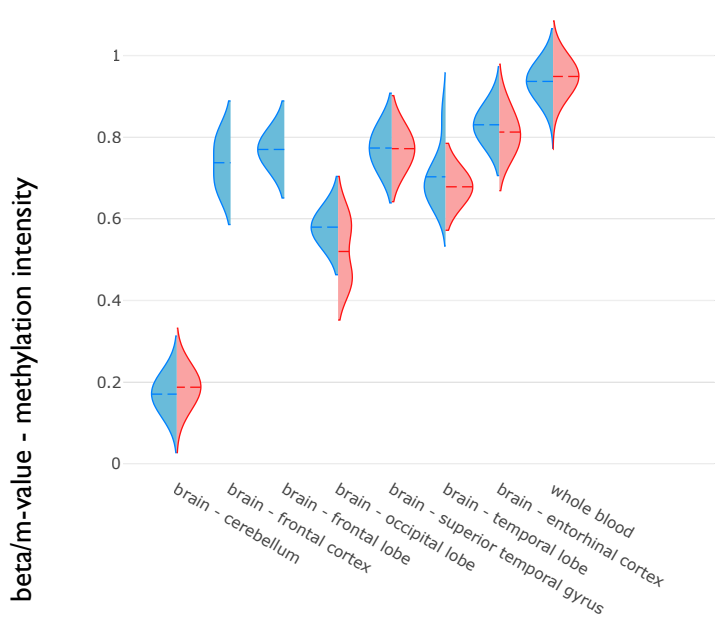

## Parkinson's disease

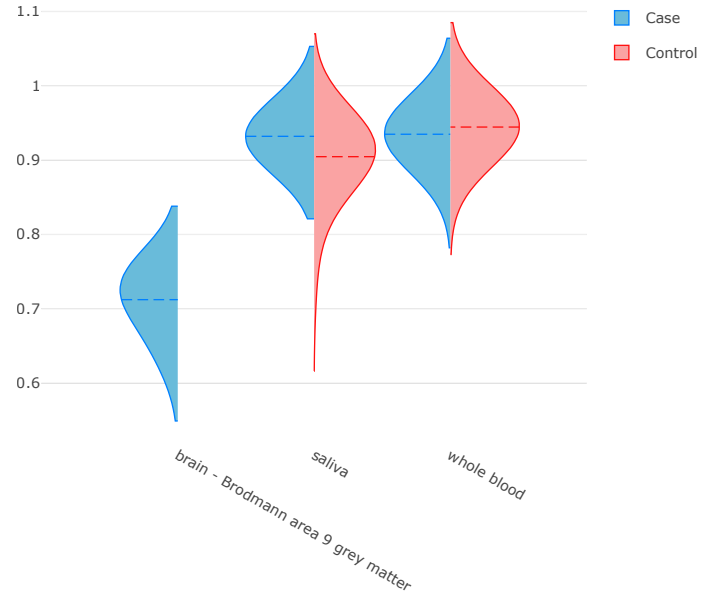

# cg21291985

## Alzheimer's disease

## schizophrenia

beta/m-value - methylation intensity

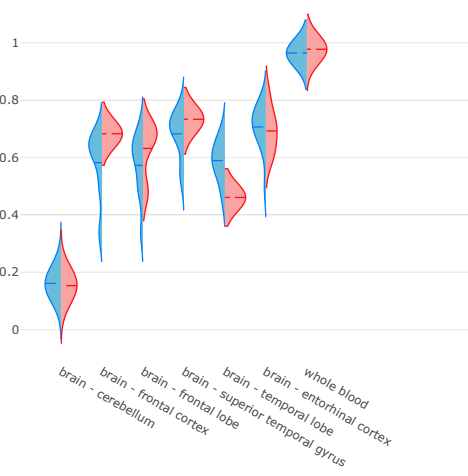

Case  
Control

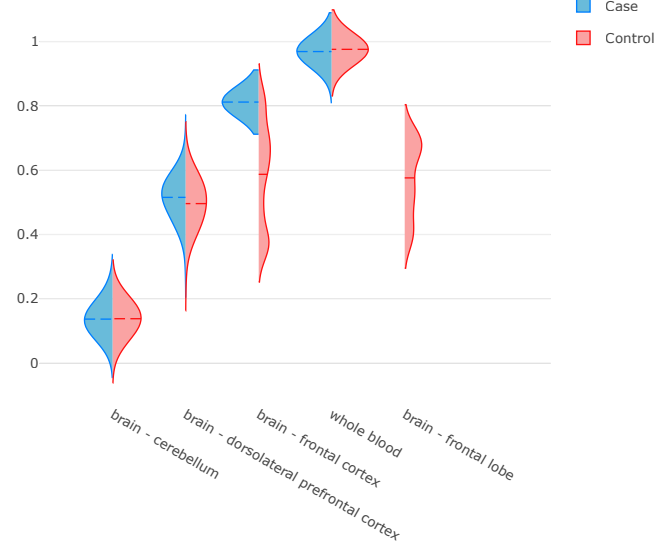

Case  
Control

## Parkinson's disease

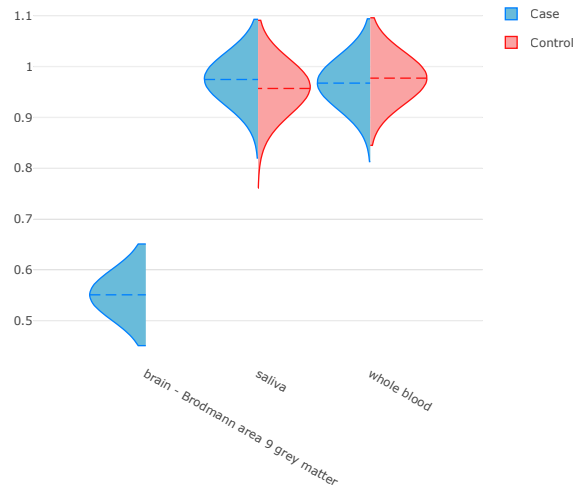

Case  
Control

cg08095637

schizophrenia

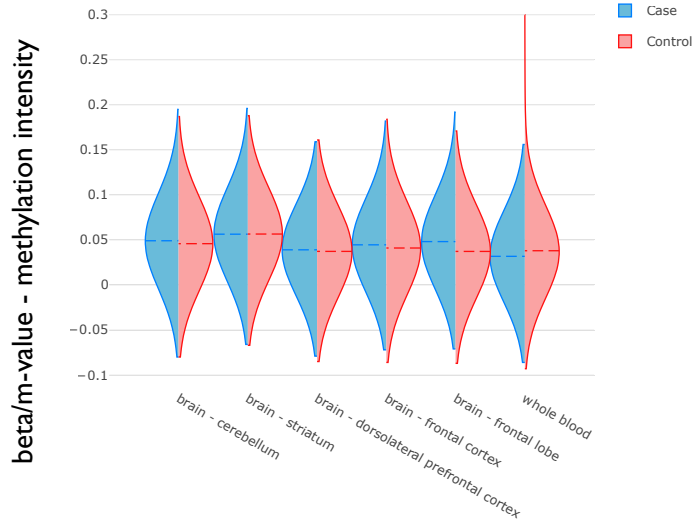

Parkinson's disease

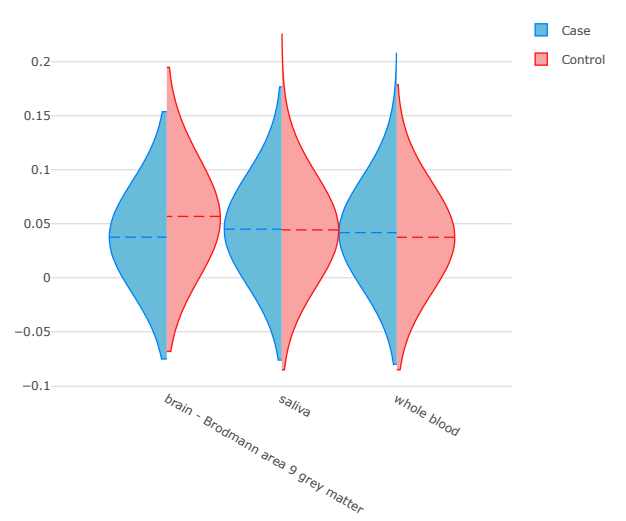

Supplement: supplementaryfile4_ddab102.pdf [file supplementaryfile4_ddab102.pdf]
