# Supplementary material
Source: PubMed Central journal article supplement (PMC8255129)

## Table of Contents

|                                                                                                                                                      |   |
|------------------------------------------------------------------------------------------------------------------------------------------------------|---|
| Table S1: Gene-Drug interaction mined from <i>The Drug-Gene interaction database</i> .....                                                           | 1 |
| Fig S1. Drug Enrichment Set Analysis (DSEA). Analyzing enriched gene functions for drugs identified from drug-gene interaction (as shown above)..... | 5 |
| Table S2: Tabular associations of DSEA shown in the above figure .....                                                                               | 5 |
| Fig S2: Effect direction of SNPs in the shared causal region for LTL and brain volume measures .....                                                 | 7 |

Table S1: Gene-Drug interaction mined from *The Drug-Gene interaction database*

| search_term  | match_type | drug                        | interaction_types | sources                                                                                                           | pmids    |
|--------------|------------|-----------------------------|-------------------|-------------------------------------------------------------------------------------------------------------------|----------|
| <b>PTK6</b>  | Definite   | VANDETANIB                  | inhibitor         | ChEMBLInteractions   DrugBank                                                                                     |          |
| <b>PTK6</b>  | Definite   | DYDROGESTERONE              | inhibitor         | GuideToPharmacologyInteractions                                                                                   |          |
| <b>PRKCI</b> | Definite   | CEP-2563                    | inhibitor         | ChEMBLInteractions                                                                                                |          |
| <b>PRKCI</b> | Definite   | STAUROSPORINE               | inhibitor         | GuideToPharmacologyInteractions                                                                                   |          |
| <b>PRKCI</b> | Definite   | GSK-690693                  | inhibitor         | ChEMBLInteractions                                                                                                |          |
| <b>PRKCI</b> | Definite   | (7S)-HYDROXYL-STAUROSPORINE | inhibitor         | ChEMBLInteractions                                                                                                |          |
| <b>PRKCI</b> | Definite   | QUERCETIN                   | inhibitor         | MyCancerGenome                                                                                                    |          |
| <b>PRKCI</b> | Definite   | MIDOSTAURIN                 | inhibitor         | ChEMBLInteractions                                                                                                |          |
| <b>PRKCI</b> | Definite   | SOTRASTAUIN                 | inhibitor         | ChEMBLInteractions                                                                                                |          |
| <b>PRKCI</b> | Definite   | GF-109203                   |                   | DrugBank                                                                                                          | 10592235 |
| <b>PRKCI</b> | Definite   | INGENOL MEBUTATE            |                   | TdgClinicalTrial                                                                                                  |          |
| <b>NPY1R</b> | Definite   | CHEMBL422942                | antagonist        | TTD                                                                                                               |          |
| <b>NPY1R</b> | Definite   | CHEMBL435278                |                   | DrugBank                                                                                                          |          |
| <b>SRMS</b>  | Definite   | TG100-801                   | inhibitor         | ChEMBLInteractions                                                                                                |          |
| <b>SRMS</b>  | Definite   | PIMOZIDE                    | inhibitor         | GuideToPharmacologyInteractions                                                                                   |          |
| <b>SRMS</b>  | Definite   | DASATINIB                   | inhibitor         | ChEMBLInteractions                                                                                                |          |
| <b>SRMS</b>  | Definite   | ENMD-981693                 | inhibitor         | ChEMBLInteractions                                                                                                |          |
| <b>SRMS</b>  | Definite   | ILORASERTIB                 | inhibitor         | ChEMBLInteractions                                                                                                |          |
| <b>SRMS</b>  | Definite   | XL-228                      | inhibitor         | ChEMBLInteractions                                                                                                |          |
| <b>EPHX1</b> | Definite   | AR9281                      |                   | TdgClinicalTrial                                                                                                  |          |
| <b>EPHX1</b> | Definite   | DOCETAXEL                   |                   | PharmGKB                                                                                                          |          |
| <b>PARP1</b> | Definite   | NIACINAMIDE                 | binder            | DrugBank   TTD                                                                                                    | 11752352 |
| <b>PARP1</b> | Definite   | OLAPARIB                    | inhibitor         | MyCancerGenome   ClarityFoundationClinicalTrial   GuideToPharmacologyInteractions   ChEMBLInteractions   DrugBank | 25981132 |

|              |          |                         |                      |                                                                                                                             |                                |
|--------------|----------|-------------------------|----------------------|-----------------------------------------------------------------------------------------------------------------------------|--------------------------------|
|              |          |                         |                      | MyCancerGenomeClinicalTrial TTD                                                                                             |                                |
| <b>PARP1</b> | Definite | RUCAPARIB               | antagonist inhibitor | TALC MyCancerGenome ClarityFoundationClinicalTrial GuideToPharmacology Interactions ChEMBLInteractions DrugBank             |                                |
| <b>PARP1</b> | Definite | NIRAPARIB               | inhibitor            | TALC MyCancerGenome TdgClinicalTrial ClarityFoundationClinicalTrial GuideToPharmacology Interactions ChEMBLInteractions TTD |                                |
| <b>PARP1</b> | Definite | HEPTANOATE              | inhibitor            | GuideToPharmacology Interactions                                                                                            |                                |
| <b>PARP1</b> | Definite | TALAZOPARIB             | inhibitor            | TALC ClarityFoundationClinicalTrial GuideToPharmacology Interactions ChEMBLInteractions                                     |                                |
| <b>PARP1</b> | Definite | VELIPARIB               | inhibitor            | TALC MyCancerGenome ClarityFoundationClinicalTrial ChEMBLInteractions DrugBank CancerCommons MyCancerGenomeClinicalTrial    | 10592235                       |
| <b>PARP1</b> | Definite | INOSINE                 | inhibitor            | TTD                                                                                                                         |                                |
| <b>PARP1</b> | Definite | INIPARIB                | inhibitor            | TALC MyCancerGenome TdgClinicalTrial TTD                                                                                    |                                |
| <b>PARP1</b> | Definite | TALAZOPARIB<br>TOSYLATE | inhibitor            | ChEMBLInteractions                                                                                                          |                                |
| <b>PARP1</b> | Definite | RUCAPARIB<br>CAMSYLATE  | inhibitor            | ChEMBLInteractions                                                                                                          |                                |
| <b>PARP1</b> | Definite | CHEMBL123978            |                      | DrugBank                                                                                                                    | 10592235<br> 17139284 17016423 |
| <b>PARP1</b> | Definite | CHEMBL134022            |                      | DrugBank                                                                                                                    | 10592235                       |
| <b>PARP1</b> | Definite | CHEMBL452800            |                      | DrugBank                                                                                                                    | 10592235                       |
| <b>PARP1</b> | Definite | CHEMBL123904            |                      | DrugBank                                                                                                                    | 10592235                       |
| <b>PARP1</b> | Definite | CHEMBL125200            |                      | DrugBank                                                                                                                    | 10592235<br> 17139284 17016423 |

|                |          |                                  |           |                                 |                                        |
|----------------|----------|----------------------------------|-----------|---------------------------------|----------------------------------------|
| <b>PARP1</b>   | Definite | CHEMBL401843                     |           | DrugBank                        | 10592235<br> 1713928<br>4 170164<br>23 |
| <b>PARP1</b>   | Definite | CHEMBL338790                     |           | DrugBank                        | 10592235                               |
| <b>PARP1</b>   | Definite | CHEMBL361054                     |           | DrugBank                        | 10592235                               |
| <b>TERC</b>    | Definite | IFOSFAMIDE                       |           | NCI                             | 10769656                               |
| <b>TERC</b>    | Definite | CISPLATIN<br>(CHEMBL206823<br>7) |           | NCI                             | 10769656                               |
| <b>TERC</b>    | Definite | ZIDOVUDINE                       |           | NCI                             | 11036953                               |
| <b>SLK</b>     | Definite | DANUSERTIB                       | inhibitor | GuideToPharmacologyInteractions |                                        |
| <b>SLK</b>     | Definite | DASATINIB                        | inhibitor | TTD                             |                                        |
| <b>SLK</b>     | Definite | TOZASERTIB                       | inhibitor | TTD                             |                                        |
| <b>SLK</b>     | Definite | CHEMBL261720                     |           | DrugBank                        | 10592235                               |
| <b>PSME1</b>   | Definite | BORTEZOMIB                       | inhibitor | MyCancerGenome                  |                                        |
| <b>PSME1</b>   | Definite | CARFILZOMIB                      | inhibitor | MyCancerGenome                  |                                        |
| <b>SLC12A7</b> | Definite | POTASSIUM<br>CHLORIDE            |           | DrugBank                        | 16949074<br> 1694336<br>4 174188<br>19 |
| <b>ATM</b>     | Definite | CHEMBL1221601                    | inhibitor | GuideToPharmacologyInteractions |                                        |
| <b>ATM</b>     | Definite | KU-55933                         | inhibitor | GuideToPharmacologyInteractions |                                        |
| <b>ATM</b>     | Definite | SELUMETINIB                      |           | CIViC                           | 27922010                               |
| <b>ATM</b>     | Definite | VANDETANIB                       |           | CKB                             | 27683183                               |
| <b>ATM</b>     | Definite | BINIMETINIB                      |           | CKB                             | 28514312                               |
| <b>ATM</b>     | Definite | PACLITAXEL                       |           | CKB                             | 26282658                               |
| <b>ATM</b>     | Definite | VALPROIC ACID                    |           | CKB                             | 20739657                               |
| <b>ATM</b>     | Definite | TALAZOPARIB                      |           | ClarityFoundationBiomarkers CKB | 23881923                               |
| <b>ATM</b>     | Definite | CHEMBL188678                     |           | CIViC                           | 23761041                               |
| <b>ATM</b>     | Definite | RUCAPARIB                        |           | ClarityFoundationBiomarkers     |                                        |
| <b>ATM</b>     | Definite | BENDAMUSTINE                     |           | CKB                             | 20739657                               |
| <b>ATM</b>     | Definite | AZD-6738                         |           | CKB CGI                         | 26563132<br> 2651723<br>9              |
| <b>ATM</b>     | Definite | TRAMETINIB                       |           | CIViC                           | 27922010                               |
| <b>ATM</b>     | Definite | VELIPARIB                        |           | ClarityFoundationBiomarkers CKB | 21300883<br> 2763885<br>9              |
| <b>ATM</b>     | Definite | VX-970                           |           | CKB                             | 28363999                               |
| <b>ATM</b>     | Definite | NIRAPARIB                        |           | ClarityFoundationBiomarkers     |                                        |
| <b>ATM</b>     | Definite | TEMOZOLOMIDE                     |           | CGI CIViC                       | 23960094                               |

|                |          |                              |            |                                                               |                                                                                          |
|----------------|----------|------------------------------|------------|---------------------------------------------------------------|------------------------------------------------------------------------------------------|
| <b>ATM</b>     | Definite | OLAPARIB                     |            | ClarityFoundationB<br>iomarkers OncoKB <br>CKB CGI CIViC      | 20739657<br> 2651002<br>0 283639<br>99 20124<br>459 2484<br>1718 8 2<br>014 2628<br>2658 |
| <b>ATM</b>     | Definite | CHEMBL1086377                |            | CIVIC                                                         | 23761041                                                                                 |
| <b>ATM</b>     | Definite | IRINOTECAN                   |            | CKB CGI                                                       | 27638859                                                                                 |
| <b>ATM</b>     | Definite | AZD-6482                     |            | CKB                                                           | 26563132                                                                                 |
| <b>ATM</b>     | Definite | IBRUTINIB                    |            | CKB                                                           | 26563132                                                                                 |
| <b>ATM</b>     | Definite | FLUDARABINE                  |            | CKB                                                           | 20739657                                                                                 |
| <b>ATM</b>     | Definite | EVEROLIMUS                   |            | CKB                                                           | 27683183                                                                                 |
| <b>ATM</b>     | Definite | QUINPIROLE                   |            | CGI                                                           |                                                                                          |
| <b>BCL2L2</b>  | Definite | NAVITOCCLAX                  | inhibitor  | TALC TdgClinicalTria<br>l ChembIInteractions<br> DrugBank TTD |                                                                                          |
| <b>BCL2L2</b>  | Definite | CHEMBL376408                 | antagonist | GuideToPharmacolo<br>gyInteractions                           |                                                                                          |
| <b>BCL2L2</b>  | Definite | VENETOCLAX                   | antagonist | GuideToPharmacolo<br>gyInteractions                           |                                                                                          |
| <b>BCL2L2</b>  | Definite | OBATOCLAX<br>MESYLATE        | inhibitor  | ChembIInteractions                                            |                                                                                          |
| <b>BCL2L2</b>  | Definite | CLADRIBINE                   |            | NCI                                                           | 15813915                                                                                 |
| <b>BCL2L2</b>  | Definite | BORTEZOMIB                   |            | NCI                                                           | 15813915                                                                                 |
| <b>DHRS4L2</b> | Definite | MATAIRESINOL                 |            | DrugBank                                                      | 10592235                                                                                 |
| <b>TERT</b>    | Definite | ZIDOVUDINE                   | inhibitor  | DrugBank                                                      | 23303810                                                                                 |
| <b>TERT</b>    | Definite | IMETELSTAT                   | inhibitor  | TdgClinicalTrial Che<br>mbIInteractions                       |                                                                                          |
| <b>TERT</b>    | Definite | IMETELSTAT<br>SODIUM         | inhibitor  | ChembIInteractions                                            |                                                                                          |
| <b>TERT</b>    | Definite | RALOXIFENE                   |            | NCI                                                           | 15590986                                                                                 |
| <b>TERT</b>    | Definite | ARSENIC<br>TRIOXIDE          |            | NCI                                                           | 16285558                                                                                 |
| <b>TERT</b>    | Definite | BEVACIZUMAB                  |            | NCI                                                           | 15687494                                                                                 |
| <b>TERT</b>    | Definite | OMACETAXINE<br>MEPESUCCINATE |            | NCI                                                           | 12744738                                                                                 |

## Fig S1. Drug Enrichment Set Analysis (DSEA). Analyzing enriched gene functions for drugs identified from drug-gene interaction

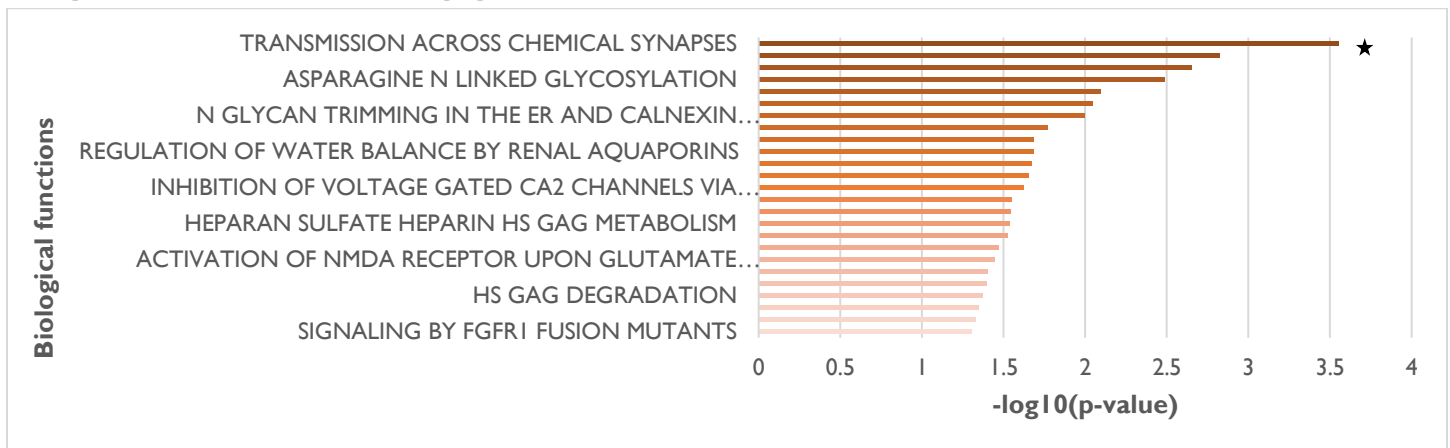

*Mapped drugs* on whom data was available in DSEA: dydrogesterone, staurosporine, quercetin, pimoziide, ifosfamide, zidovudine, paclitaxel, irinotecan, quinpirole, raloxyfene

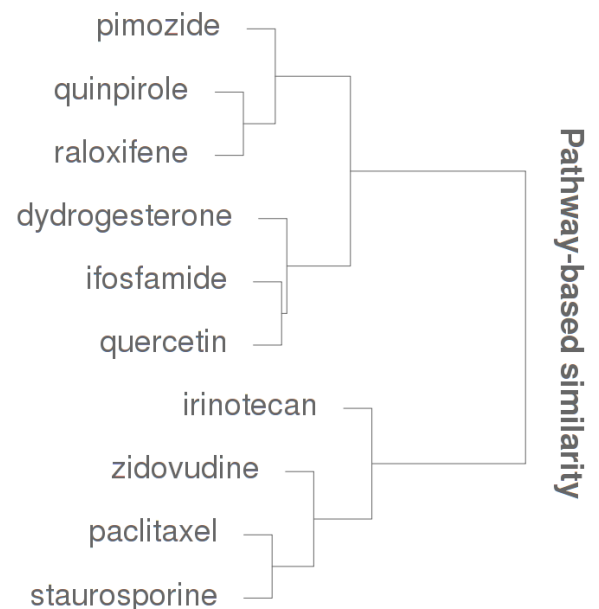

The bar graph on the top shows gene pathways that are nominally significant ( $p < 0.05$ ) and color of the bars correspond to the gradient of significance i.e. the lowest value p-value is shown from top to bottom. The FDR significant process is marked with a star. The x-axis shows  $-\log_{10}(\text{p-value})$  of the processes from Reactome pathway database (y-axis). In the left box below the bar graphs are the 10 drugs on whom the data was available in the DSEA and were analyzed for gene function enrichment. The pathway similarity dendrogram on the right, groups drugs based on similarity of the drug-gene function sets.

Table S2: Tabular associations of DSEA shown in the above figure

| Reactome Pathway Name                 | EScore | Pvalue   | $-\log_{10}(\text{Pval})$ | FDR             |
|---------------------------------------|--------|----------|---------------------------|-----------------|
| TRANSMISSION ACROSS CHEMICAL SYNAPSES | -0.67  | 2.78E-04 | 3.555955                  | <b>0.018626</b> |
| AQUAPORIN MEDIATED TRANSPORT          | -0.6   | 1.50E-03 | 2.823909                  | 0.049803        |
| CALNEXIN CALRETICULIN CYCLE           | 0.59   | 2.23E-03 | 2.651695                  | 0.049803        |

|                                                                                              |       |          |          |          |
|----------------------------------------------------------------------------------------------|-------|----------|----------|----------|
| ASPARAGINE N LINKED GLYCOSYLATION                                                            | 0.57  | 3.24E-03 | 2.489455 | 0.05427  |
| MITOCHONDRIAL TRNA AMINOACYLATION                                                            | -0.53 | 8.02E-03 | 2.095826 | 0.095619 |
| NEUROTRANSMITTER RECEPTOR BINDING AND<br>DOWNSTREAM TRANSMISSION IN THE POSTSYNAPTIC<br>CELL | -0.52 | 8.96E-03 | 2.047692 | 0.095619 |
| N GLYCAN TRIMMING IN THE ER AND CALNEXIN<br>CALRETICULIN CYCLE                               | 0.52  | 9.99E-03 | 2.000435 | 0.095619 |
| P38MAPK EVENTS                                                                               | -0.49 | 1.69E-02 | 1.772113 | 0.117053 |
| NEURONAL SYSTEM                                                                              | -0.48 | 2.05E-02 | 1.688246 | 0.117053 |
| REGULATION OF WATER BALANCE BY RENAL<br>AQUAPORINS                                           | -0.48 | 2.05E-02 | 1.688246 | 0.117053 |
| POST TRANSLATIONAL PROTEIN MODIFICATION                                                      | 0.48  | 2.11E-02 | 1.675718 | 0.117053 |
| IL 7 SIGNALING                                                                               | -0.48 | 2.20E-02 | 1.657577 | 0.117053 |
| INHIBITION OF VOLTAGE GATED CA2 CHANNELS VIA<br>GBETA GAMMA SUBUNITS                         | -0.47 | 2.36E-02 | 1.627088 | 0.117053 |
| ACTIVATION OF THE PRE REPLICATIVE COMPLEX                                                    | -0.46 | 2.81E-02 | 1.551294 | 0.117053 |
| IONOTROPIC ACTIVITY OF KAINATE RECEPTORS                                                     | -0.46 | 2.86E-02 | 1.543634 | 0.117053 |
| HEPARAN SULFATE HEPARIN HS GAG METABOLISM                                                    | 0.46  | 2.88E-02 | 1.540608 | 0.117053 |
| COLLAGEN FORMATION                                                                           | -0.46 | 2.97E-02 | 1.527244 | 0.117053 |
| REGULATION OF INSULIN SECRETION BY GLUCAGON<br>LIKE PEPTIDE1                                 | -0.45 | 3.37E-02 | 1.47237  | 0.12     |
| ACTIVATION OF NMDA RECEPTOR UPON GLUTAMATE<br>BINDING AND POSTSYNAPTIC EVENTS                | -0.45 | 3.57E-02 | 1.447332 | 0.12     |
| DAG AND IP3 SIGNALING                                                                        | -0.44 | 3.97E-02 | 1.401209 | 0.12     |
| UNBLOCKING OF NMDA RECEPTOR GLUTAMATE<br>BINDING AND ACTIVATION                              | -0.44 | 4.02E-02 | 1.395774 | 0.12     |
| HS GAG DEGRADATION                                                                           | 0.44  | 4.24E-02 | 1.372634 | 0.12     |
| E2F MEDIATED REGULATION OF DNA REPLICATION                                                   | -0.44 | 4.49E-02 | 1.347754 | 0.12     |
| G BETA GAMMA SIGNALLING THROUGH PI3KGAMMA                                                    | -0.44 | 4.68E-02 | 1.329754 | 0.12     |
| SIGNALING BY FGFR1 FUSION MUTANTS                                                            | -0.43 | 4.91E-02 | 1.308919 | 0.12     |
| EXTRACELLULAR MATRIX ORGANIZATION                                                            | -0.43 | 5.13E-02 | 1.289883 | 0.12     |
| PASSIVE TRANSPORT BY AQUAPORINS                                                              | -0.43 | 5.31E-02 | 1.274905 | 0.12     |
| TRANSMEMBRANE TRANSPORT OF SMALL<br>MOLECULES                                                | -0.43 | 5.33E-02 | 1.273273 | 0.12     |
| REPAIR SYNTHESIS FOR GAP FILLING BY DNA POL IN TC<br>NER                                     | -0.43 | 5.48E-02 | 1.261219 | 0.12     |
| PYRUVATE METABOLISM AND CITRIC ACID TCA CYCLE                                                | 0.42  | 5.68E-02 | 1.245652 | 0.12     |
| REGULATED PROTEOLYSIS OF P75NTR                                                              | 0.42  | 5.90E-02 | 1.229148 | 0.12     |
| PLATELET AGGREGATION PLUG FORMATION                                                          | -0.42 | 6.20E-02 | 1.207608 | 0.12     |
| FANCONI ANEMIA PATHWAY                                                                       | -0.42 | 6.29E-02 | 1.201349 | 0.12     |
| RAP1 SIGNALLING                                                                              | -0.41 | 7.31E-02 | 1.136083 | 0.12     |
| METABOLISM OF NON CODING RNA                                                                 | -0.41 | 7.32E-02 | 1.135489 | 0.12     |
| ADVANCED GLYCOSYLATION ENDPRODUCT RECEPTOR<br>SIGNALING                                      | 0.41  | 7.42E-02 | 1.129596 | 0.12     |
| ACTIVATION OF RAC                                                                            | -0.41 | 7.42E-02 | 1.129596 | 0.12     |
| NITRIC OXIDE STIMULATES GUANYLATE CYCLASE                                                    | -0.41 | 7.62E-02 | 1.118045 | 0.12     |
| INWARDLY RECTIFYING K CHANNELS                                                               | -0.4  | 7.97E-02 | 1.098542 | 0.12     |
| SYNTHESIS OF PC                                                                              | -0.4  | 8.38E-02 | 1.076756 | 0.12     |

|                                                                       |       |          |          |      |
|-----------------------------------------------------------------------|-------|----------|----------|------|
| G ALPHA S SIGNALLING EVENTS                                           | -0.4  | 8.39E-02 | 1.076238 | 0.12 |
| POST TRANSLATIONAL MODIFICATION SYNTHESIS OF GPI ANCHORED PROTEINS    | 0.4   | 8.49E-02 | 1.071092 | 0.12 |
| TAK1 ACTIVATES NFKB BY PHOSPHORYLATION AND ACTIVATION OF IKKS COMPLEX | 0.4   | 8.62E-02 | 1.064493 | 0.12 |
| TRANSCRIPTIONAL REGULATION OF WHITE ADIPOCYTE DIFFERENTIATION         | 0.4   | 8.70E-02 | 1.060481 | 0.12 |
| PACKAGING OF TELOMERE ENDS                                            | 0.4   | 8.91E-02 | 1.050122 | 0.12 |
| GROWTH HORMONE RECEPTOR SIGNALING                                     | -0.39 | 9.35E-02 | 1.029188 | 0.12 |
| APOPTOSIS INDUCED DNA FRAGMENTATION                                   | -0.39 | 9.46E-02 | 1.024109 | 0.12 |
| GLUCAGON TYPE LIGAND RECEPTORS                                        | -0.39 | 9.58E-02 | 1.018634 | 0.12 |
| COSTIMULATION BY THE CD28 FAMILY                                      | -0.39 | 9.71E-02 | 1.012781 | 0.12 |
| CREB PHOSPHORYLATION THROUGH THE ACTIVATION OF CAMKII                 | -0.39 | 9.83E-02 | 1.007446 | 0.12 |
| GENERIC TRANSCRIPTION PATHWAY                                         | 0.39  | 9.91E-02 | 1.003926 | 0.12 |
| NUCLEAR EVENTS KINASE AND TRANSCRIPTION FACTOR ACTIVATION             | 0.39  | 9.92E-02 | 1.003488 | 0.12 |
| INTRINSIC PATHWAY                                                     | -0.39 | 1.02E-01 | 0.9914   | 0.12 |
| ACTIVATION OF KAINATE RECEPTORS UPON GLUTAMATE BINDING                | -0.39 | 1.02E-01 | 0.9914   | 0.12 |
| ADAPTIVE IMMUNE SYSTEM                                                | 0.39  | 1.03E-01 | 0.987163 | 0.12 |
| RAS ACTIVATION UOPN CA2 INFUX THROUGH NMDA RECEPTOR                   | -0.39 | 1.05E-01 | 0.978811 | 0.12 |
| HOST INTERACTIONS OF HIV FACTORS                                      | -0.38 | 1.09E-01 | 0.962574 | 0.12 |
| INTEGRATION OF PROVIRUS                                               | -0.38 | 1.12E-01 | 0.950782 | 0.12 |
| TRAFFICKING AND PROCESSING OF ENDOSOMAL TLR                           | 0.38  | 1.12E-01 | 0.950782 | 0.12 |
| SIGNALING BY ROBO RECEPTOR                                            | -0.38 | 1.13E-01 | 0.946922 | 0.12 |
| POST NMDA RECEPTOR ACTIVATION EVENTS                                  | -0.38 | 1.16E-01 | 0.935542 | 0.12 |
| CIRCADIAN CLOCK                                                       | 0.38  | 1.17E-01 | 0.931814 | 0.12 |
| NUCLEOTIDE LIKE PURINERGIC RECEPTORS                                  | -0.38 | 1.17E-01 | 0.931814 | 0.12 |
| ACTIVATION OF CHAPERONES BY ATF6 ALPHA                                | 0.38  | 1.18E-01 | 0.928118 | 0.12 |
| DOWNREGULATION OF TGF BETA RECEPTOR SIGNALING                         | -0.38 | 1.19E-01 | 0.924453 | 0.12 |
| GAMMA CARBOXYLATION TRANSPORT AND AMINO TERMINAL CLEAVAGE OF PROTEINS | -0.38 | 1.20E-01 | 0.920819 | 0.12 |
| RESOLUTION OF AP SITES VIA THE SINGLE NUCLEOTIDE REPLACEMENT PATHWAY  | -0.38 | 1.20E-01 | 0.920819 | 0.12 |

## Fig S2: Effect direction of SNPs in the shared causal region for LTL and brain volume measures

The regions which showed >90% probability of colocalization between LTL and brain volume measure have been shown here. The SNPs in each region exhibit different effect direction (Zscore) with respect to their phenotype. Therefore, their colocalization cannot be interpreted for direction of causality between the two phenotypes.

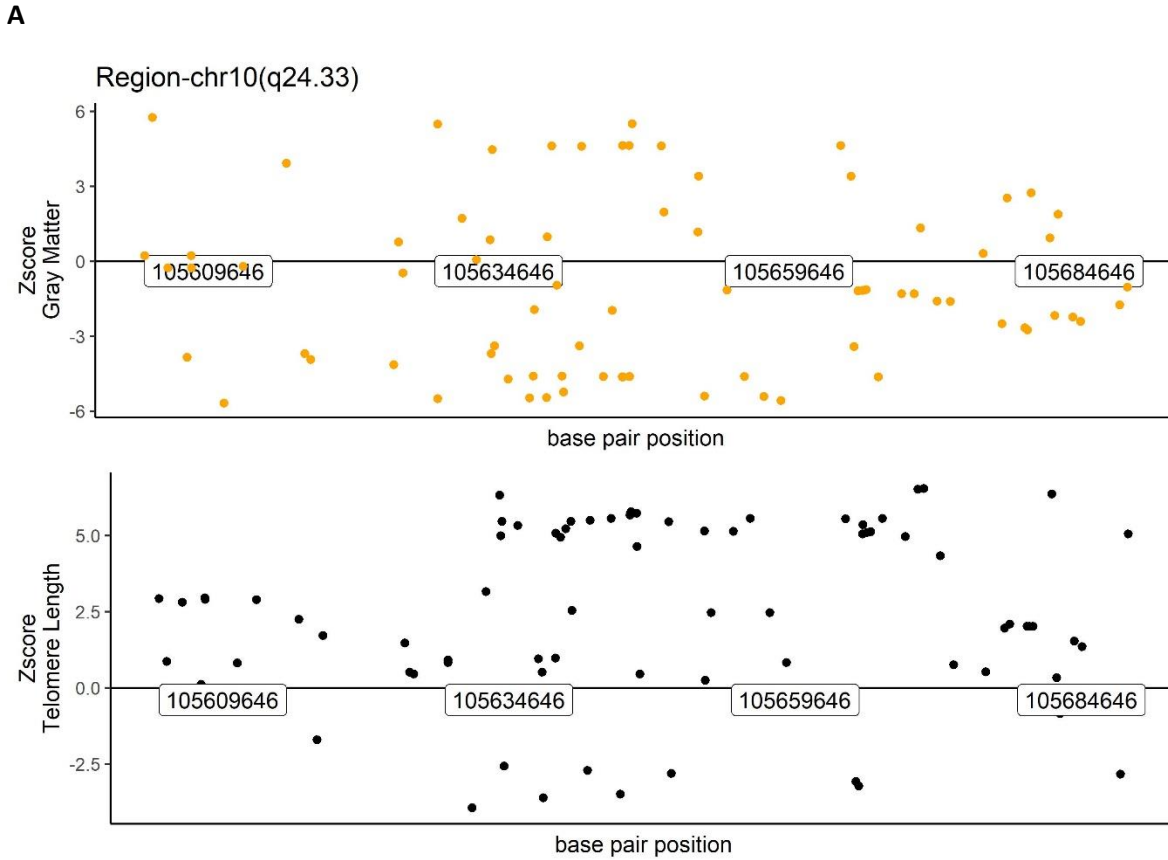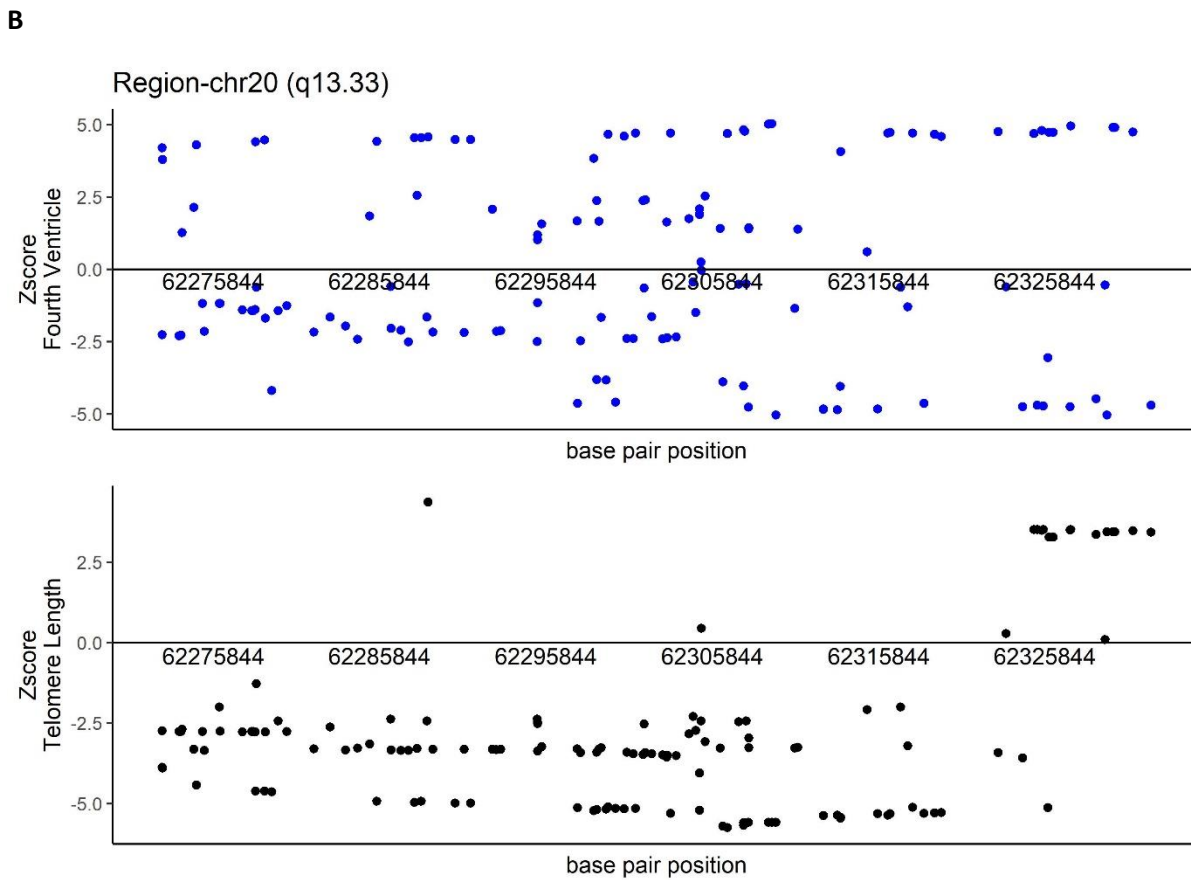



c

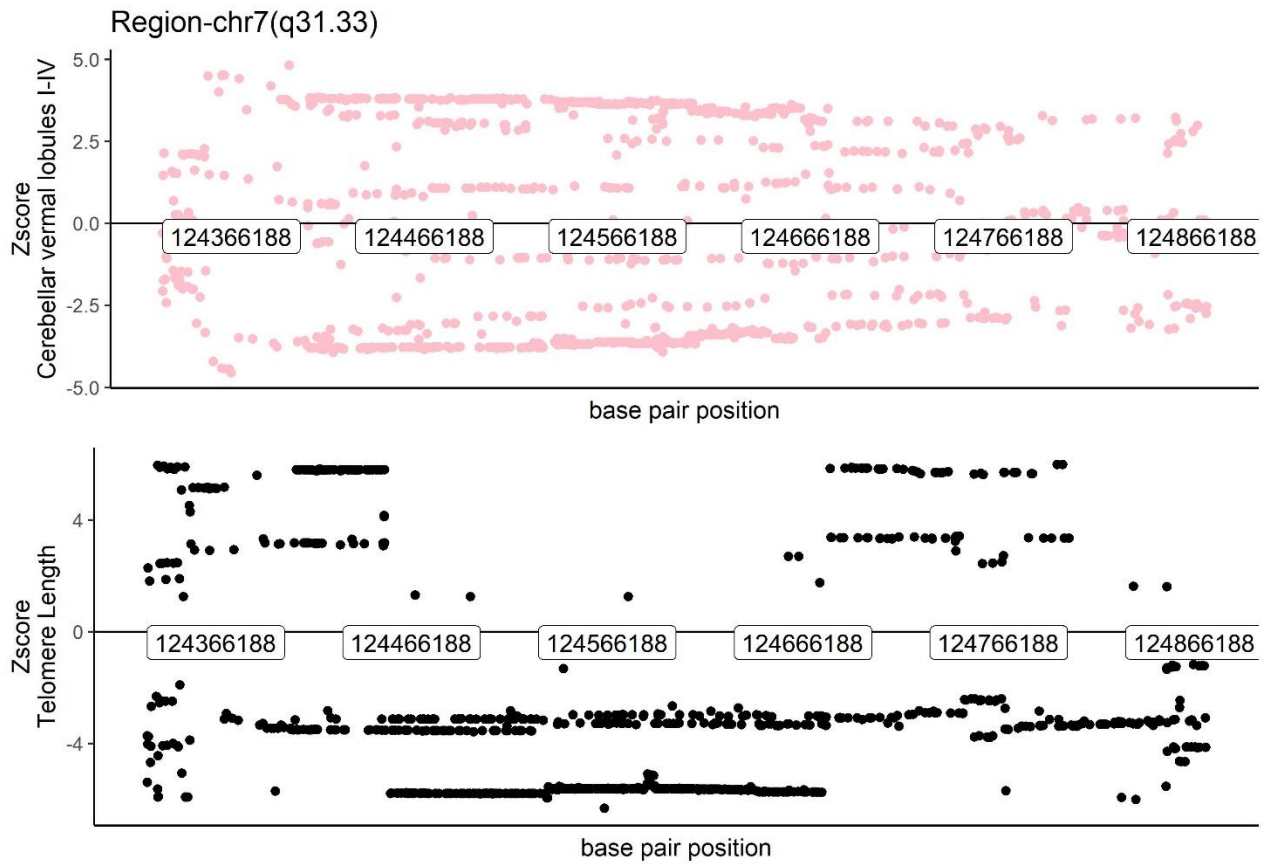

Supplement: supplementaryfile6_ddab102.pdf [file supplementaryfile6_ddab102.pdf]
