# Supplementary material
Source: PubMed Central journal article supplement (PMC8255129)
Supplement: supplementaryfile3_ddab102.pdf [file supplementaryfile3_ddab102.pdf]

Meta-analysed brain tissues for gene expression eQTL

Top hits in EAS

| probeID         | ProbeChr | Gene  | Probe_bp  | topSNP    | topSNP_chr | topSNP_bp | A1 | A2 | Freq     | b_GWAS   | se_GWAS  | p_GWAS   | b_eQTL   | se_eQTL  | p_eQTL   | b_SMR    | se_SMR   | p_SMR    | p_HEIDI    | nsnp_HEIDI |
|-----------------|----------|-------|-----------|-----------|------------|-----------|----|----|----------|----------|----------|----------|----------|----------|----------|----------|----------|----------|------------|------------|
| ENSG00000100000 | 14       | DHRS1 | 24764421  | rs4557933 | 14         | 24768949  | C  | G  | 0.715278 | 0.069884 | 0.013454 | 2.06E-07 | -0.51726 | 0.040916 | 1.24E-36 | -0.13511 | 0.028121 | 1.55E-06 | 1.2527E-21 | 6 GWS      |
| ENSG00000100000 | 11       | ATM   | 108166520 | rs1089082 | 11         | 108027060 | A  | C  | 0.853175 | -0.05031 | 0.009138 | 3.67E-08 | -0.22175 | 0.036817 | 1.71E-09 | 0.2269   | 0.055835 | 4.83E-05 | 0.0636192  | 12 notGWS  |

Comparative results in EUR

|                 |    |       |           |           |    |           |   |   |          |          |          |          |          |          |          |          |          |          |           |           |
|-----------------|----|-------|-----------|-----------|----|-----------|---|---|----------|----------|----------|----------|----------|----------|----------|----------|----------|----------|-----------|-----------|
| ENSG00000100000 | 14 | DHRS1 | 24764421  | rs1289241 | 14 | 24768534  | T | G | 0.818091 | 0.004958 | 0.007131 | 0.48795  | -0.58966 | 0.037775 | 6.27E-55 | -0.00841 | 0.012106 | 0.487325 | 0.2380461 | 20 notGWS |
| ENSG00000100000 | 11 | ATM   | 108166520 | rs1121261 | 11 | 108283161 | A | C | 0.276342 | -0.0321  | 0.008037 | 6.76E-05 | -0.21359 | 0.036857 | 6.83E-09 | 0.150301 | 0.045702 | 0.001006 | 0.4669738 | 7 notGWS  |

Prefrontal cortex - Gene expression - eQTL - PsychENCODE

Significant hits in EAS

| ProbeChr        | Gene | Probe_bp | topSNP    | topSNP_chr | topSNP_bp | A1        | A2 | Freq | b_GWAS   | se_GWAS  | p_GWAS   | b_eQTL   | se_eQTL  | p_eQTL   | b_SMR    | se_SMR   | p_SMR    | p_HEIDI  | nsnp_HEIDI |        |
|-----------------|------|----------|-----------|------------|-----------|-----------|----|------|----------|----------|----------|----------|----------|----------|----------|----------|----------|----------|------------|--------|
| ENSG00000100000 | 11   | ATM      | 108093211 | rs6589008  | 11        | 108041897 | G  | A    | 0.159722 | -0.05163 | 0.009122 | 1.51E-08 | -0.36111 | 0.039039 | 2.25E-20 | 0.142977 | 0.029614 | 1.38E-06 | 0.05901643 | 20 GWS |
| ENSG00000100000 | 14   | DHRS1    | 24759804  | rs2295313  | 14        | 24739055  | G  | T    | 0.109127 | 0.052143 | 0.010215 | 3.32E-07 | -0.4451  | 0.036383 | 2.05E-34 | -0.11715 | 0.024867 | 2.47E-06 | 1.11E-05   | 7 GWS  |
| ENSG00000100000 | 7    | GPR37    | 124386051 | rs7791045  | 7         | 124385842 | C  | T    | 0.076389 | -0.05361 | 0.009051 | 3.16E-09 | -0.33125 | 0.038056 | 3.20E-18 | 0.161839 | 0.033051 | 9.75E-07 | 0.2215203  | 11 GWS |

Comparative results in EUR

|    |       |           |           |    |           |   |   |          |          |          |          |          |          |          |          |          |          |            |            |
|----|-------|-----------|-----------|----|-----------|---|---|----------|----------|----------|----------|----------|----------|----------|----------|----------|----------|------------|------------|
| 11 | ATM   | 108093211 | rs227053  | 11 | 108226855 | T | A | 0.012923 | -0.0304  | 0.007538 | 5.76E-05 | -0.33649 | 0.03721  | 1.52E-19 | 0.090334 | 0.024529 | 0.000231 | 0.8738592  | 12 notGWAS |
| 14 | DHRS1 | 24759804  | rs7146665 | 14 | 24762882  | G | C | 0.488072 | 0.006541 | 0.007532 | 0.386287 | -0.61868 | 0.036815 | 2.24E-63 | -0.01057 | 0.01219  | 0.385761 | 0.2599006  | 15 notGWAS |
| 7  | GPR37 | 124386051 | rs4731206 | 7  | 124385665 | A | T | 0.033797 | 0.009638 | 0.008102 | 0.235372 | 0.284438 | 0.045029 | 2.67E-10 | 0.033883 | 0.028985 | 0.242414 | 0.00434819 | 13 notGWAS |

Significant hits in EUR

| ProbeChr        | Gene | Probe_bp      | topSNP    | topSNP_chr | topSNP_bp | A1        | A2 | Freq | b_GWAS   | se_GWAS  | p_GWAS   | b_eQTL   | se_eQTL  | p_eQTL   | b_SMR    | se_SMR   | p_SMR    | p_HEIDI  | nsnp_HEIDI |        |
|-----------------|------|---------------|-----------|------------|-----------|-----------|----|------|----------|----------|----------|----------|----------|----------|----------|----------|----------|----------|------------|--------|
| ENSG00000100000 | 10   | RP11-541N10.3 | 105637132 | rs1159801  | 10        | 105661315 | A  | C    | 0.232604 | -0.03959 | 0.007119 | 2.91E-08 | 0.384414 | 0.038475 | 1.66E-23 | -0.10298 | 0.021194 | 1.18E-06 | 0.1069691  | 11 GWS |
| ENSG00000100000 | 3    | MYNN          | 169490619 | rs9868000  | 3         | 169510789 | A  | G    | 0.192843 | -0.08886 | 0.008    | 1.56E-28 | 0.298613 | 0.040977 | 3.16E-13 | -0.29758 | 0.048839 | 1.11E-09 | 0.1733049  | 14 GWS |
| ENSG00000100000 | 3    | RP11-362K14.5 | 169494980 | rs9868000  | 3         | 169510789 | A  | G    | 0.192843 | -0.08886 | 0.008    | 1.56E-28 | -0.30884 | 0.040948 | 4.62E-14 | 0.28773  | 0.046113 | 4.38E-10 | 0.1315373  | 14 GWS |
| ENSG00000100000 | 3    | LRR34         | 169511216 | rs1004945  | 3         | 169563523 | G  | T    | 0.530815 | -0.06872 | 0.007952 | 6.64E-18 | -0.40481 | 0.036937 | 5.99E-28 | 0.169767 | 0.025017 | 1.15E-11 | 0.00090566 | 10 GWS |

Comparative results in EAS

|    |               |           |           |    |           |   |   |          |          |          |          |          |          |          |          |          |          |            |            |
|----|---------------|-----------|-----------|----|-----------|---|---|----------|----------|----------|----------|----------|----------|----------|----------|----------|----------|------------|------------|
| 10 | RP11-541N10.3 | 105637132 | rs3522332 | 10 | 105646395 | T | C | 0.109127 | 0.039033 | 0.009633 | 5.08E-05 | 0.384747 | 0.038506 | 1.65E-23 | 0.101451 | 0.027018 | 0.000173 | 7.07E-05   | 15 notGWAS |
| 3  | MYNN          | 169490619 | rs1093659 | 3  | 169467481 | C | T | 0.209325 | -0.03319 | 0.009092 | 0.000262 | 0.236817 | 0.039664 | 2.36E-09 | -0.14017 | 0.045003 | 0.001842 | 0.00321329 | 13 notGWAS |
| 3  | RP11-362K14.5 | 169494980 | rs1093659 | 3  | 169467481 | C | T | 0.209325 | -0.03319 | 0.009092 | 0.000262 | -0.27557 | 0.039568 | 3.29E-12 | 0.120453 | 0.037253 | 0.001223 | 0.00803333 | 12 notGWAS |
| 3  | LRR34         | 169511216 | rs1093659 | 3  | 169467481 | C | T | 0.105159 | -0.03319 | 0.009092 | 0.000262 | -0.26365 | 0.039599 | 2.77E-11 | 0.125898 | 0.03933  | 0.001369 | 6.23E-06   | 8 notGWAS  |

Meta analysed brain tissues - Methylation - mQTLs

Significant hits in EAS

| probeID   | ProbeChr | Gene | Probe_bp  | topSNP    | topSNP_chr | topSNP_bp | A1 | A2 | Freq     | b_GWAS   | se_GWAS  | p_GWAS   | b_eQTL   | se_eQTL  | p_eQTL   | b_SMR    | se_SMR   | p_SMR    | p_HEIDI    | nsnp_HEIDI |
|-----------|----------|------|-----------|-----------|------------|-----------|----|----|----------|----------|----------|----------|----------|----------|----------|----------|----------|----------|------------|------------|
| cg0062441 | 5        | NA   | 1282357   | rs2736100 | 5          | 1286516   | C  | A  | 0.960317 | 0.109052 | 0.009107 | 4.79E-33 | -0.50052 | 0.041402 | 1.20E-33 | -0.21788 | 0.025609 | 1.77E-17 | 0.01272385 | 4 GWS      |
| cg0738002 | 5        | NA   | 1296007   | rs2853669 | 5          | 1295349   | A  | G  | 0.500992 | -0.08186 | 0.009232 | 7.47E-19 | 0.418823 | 0.05349  | 4.88E-15 | -0.19546 | 0.033302 | 4.37E-09 | 0.01526583 | 7 GWS      |
| cg0629427 | 7        | NA   | 124387056 | rs3735270 | 7          | 124387092 | G  | C  | 0.796627 | -0.05382 | 0.009086 | 3.14E-09 | 0.443504 | 0.042676 | 2.69E-25 | -0.12136 | 0.023581 | 2.65E-07 | 0.3502334  | 15 GWS     |

Comparative results in EUR

|           |   |    |           |           |   |           |   |   |          |          |          |          |          |          |          |          |          |          |           |            |
|-----------|---|----|-----------|-----------|---|-----------|---|---|----------|----------|----------|----------|----------|----------|----------|----------|----------|----------|-----------|------------|
| cg0062441 | 5 | NA | 1282357   | rs2736100 | 5 | 1286516   | C | A | 0.121272 | 0.07827  | 0.008738 | 4.05E-19 | -0.50052 | 0.041402 | 1.20E-33 | -0.15638 | 0.021728 | 6.15E-13 | 0.8279442 | 4 GWS      |
| cg0738002 | 5 | NA | 1296007   | rs4975615 | 5 | 1315343   | G | A | 0.568588 | 0.015693 | 0.007635 | 0.040324 | 0.34611  | 0.04334  | 1.39E-15 | 0.045342 | 0.022779 | 0.046534 | 0.0194275 | 10 notGWAS |
| cg0629427 | 7 | NA | 124387056 | rs3735270 | 7 | 124387092 | G | C | 0.686879 | -0.0125  | 0.007964 | 0.117511 | 0.443504 | 0.042676 | 2.69E-25 | -0.02818 | 0.01816  | 0.120774 | 0.1147575 | 19 notGWAS |

Significant hits in EUR

|           |    |        |           |           |    |           |   |   |          |          |          |          |          |          |           |          |          |          |            |        |
|-----------|----|--------|-----------|-----------|----|-----------|---|---|----------|----------|----------|----------|----------|----------|-----------|----------|----------|----------|------------|--------|
| cg0819357 | 3  | NA     | 169529701 | rs6793160 | 3  | 169535266 | T | G | 0.936382 | -0.07309 | 0.008278 | 1.27E-18 | 1.05003  | 0.027195 | 0         | -0.06961 | 0.008087 | 7.47E-18 | 1.68E-05   | 19 GWS |
| cg1099491 | 3  | NA     | 169531864 | rs6793160 | 3  | 169535266 | T | G | 0.974155 | -0.07309 | 0.008278 | 1.27E-18 | 0.537283 | 0.041311 | 1.14E-38  | -0.13603 | 0.018622 | 2.77E-13 | 0.0173542  | 16 GWS |
| cg0062441 | 5  | NA     | 1282357   | rs2736100 | 5  | 1286516   | C | A | 0.121272 | 0.07827  | 0.008738 | 4.05E-19 | -0.50052 | 0.041402 | 1.20E-33  | -0.15638 | 0.021728 | 6.15E-13 | 0.8279442  | 4 GWS  |
| cg1100555 | 10 | NA     | 105648138 | rs1980653 | 10 | 105654164 | A | G | 0.742545 | 0.039266 | 0.007194 | 5.19E-08 | -1.12165 | 0.025332 | 0         | -0.03501 | 0.006463 | 6.06E-08 | 0.00039171 | 20 GWS |
| cg2066272 | 19 | NA     | 22235022  | rs7253490 | 19 | 22293706  | A | C | 0.703777 | 0.046826 | 0.007749 | 1.66E-09 | -1.33025 | 0.035889 | 1.00E-300 | -0.0352  | 0.005902 | 2.46E-09 | 0.00782611 | 11 GWS |
| cg0575134 | 20 | NA     | 62405935  | rs1271031 | 20 | 62410049  | A | G | 0.900596 | -0.03742 | 0.007221 | 2.35E-07 | 1.07407  | 0.026595 | 0         | -0.03483 | 0.006778 | 2.75E-07 | 0.00040879 | 20 GWS |
| cg1425126 | 20 | NA     | 62406428  | rs1271031 | 20 | 62410049  | A | G | 0.207753 | -0.03742 | 0.007221 | 2.35E-07 | 1.07001  | 0.026688 | 0         | -0.03497 | 0.006804 | 2.76E-07 | 0.00194219 | 20 GWS |
| cg0263091 | 20 | NA     | 62436995  | rs6010659 | 20 | 62437022  | A | G | 0.687873 | -0.05846 | 0.010626 | 4.06E-08 | 1.53398  | 0.034627 | 0         | -0.03811 | 0.00698  | 4.77E-08 | 0.01482589 | 19 GWS |
| cg2129198 | 20 | NA     | 62437035  | rs6010659 | 20 | 62437022  | A | G | 0.687873 | -0.05846 | 0.010626 | 4.06E-08 | 0.901011 | 0.048406 | 2.49E-77  | -0.06488 | 0.012298 | 1.32E-07 | 0.2275928  | 14 GWS |
| cg0186155 | 20 | ZBTB46 | 62439108  | rs4809362 | 20 | 62450780  | A | C | 0.491054 | -0.05931 | 0.010695 | 3.16E-08 | 0.805814 | 0.066338 | 5.94E-34  | -0.0736  | 0.01459  | 4.54E-07 | 0.4030374  | 4 GWS  |

Comparative results in EAS

|    |    |           |           |    |           |   |   |          |          |          |          |          |          |           |          |          |          |            |            |
|----|----|-----------|-----------|----|-----------|---|---|----------|----------|----------|----------|----------|----------|-----------|----------|----------|----------|------------|------------|
| 3  | NA | 169529701 | rs1685433 | 3  | 169461571 | T | G | 0.469246 | -0.06493 | 0.009149 | 1.28E-12 | 0.427371 | 0.064802 | 4.25E-11  | -0.15192 | 0.031446 | 1.36E-06 | 0.00500038 | 5 notGWAS  |
| 3  | NA | 169531864 | rs7527218 | 3  | 169534337 | G | A | 0.660714 | 0.075125 | 0.015117 | 6.71E-07 | 0.501889 | 0.089986 | 2.44E-08  | 0.149685 | 0.040342 | 0.000207 | 0.2511714  | 5 notGWAS  |
| 5  | NA | 1282357   | rs2736100 | 5  | 1286516   | C | A | 0.960317 | 0.109052 | 0.009107 | 4.79E-33 | -0.50052 | 0.041402 | 1.20E-33  | -0.21788 | 0.025609 | 1.77E-17 | 0.01272385 | 4 GWS      |
| 10 | NA | 105648138 | rs1980653 | 10 | 105654164 | A | G | 0.600198 | -0.03877 | 0.009597 | 5.35E-05 | -1.12165 | 0.025332 | 0         | 0.034566 | 0.008592 | 5.74E-05 | 1.08E-05   | 20 notGWAS |
| 19 | NA | 22235022  | rs7253490 | 19 | 22293706  | A | C | 0.127976 | 0.03622  | 0.009529 | 0.000144 | -1.33025 | 0.035889 | 1.00E-300 | -0.02723 | 0.007201 | 0.000156 | 0.1095734  | 13 notGWAS |
| 20 | NA | 62405935  | rs3810494 | 20 | 62406749  | T | C | 0.869048 | -0.00536 | 0.009324 | 0.565286 | 1.0755   | 0.026563 | 0         | -0.00499 | 0.008671 | 0.565329 | 0.1349963  | 20 notGWAS |
| 20 | NA | 62406428  | rs6122031 | 20 | 62413323  | C | T | 0.482143 | -0.00929 | 0.009291 | 0.317383 | 1.0711   | 0.026669 | 0         | -0.00867 | 0.008677 | 0.317533 | 0.08513331 | 20 notGWAS |
| 20 | NA | 624       |           |    |           |   |   |          |          |          |          |          |          |           |          |          |          |            |            |
